# 1 **Transgene-Free Ex Utero Derivation of A Human Post-Implantation** 2 **Embryo Model Solely from Genetically Unmodified Naïve PSCs**

3  
4  
5 **Bernardo Oldak<sup>1,7</sup>, Emilie Wildschutz<sup>1,7</sup>, Vladyslav Bondarenko<sup>1,7</sup>, Alejandro Aguilera-Castrejon<sup>1</sup>,**  
6 **Cheng Zhao<sup>2,3</sup>, Shadi Tarazi<sup>1</sup>, Mehmet-Yunus Comar<sup>1</sup>, Shahd Ashoukhi<sup>1</sup>, Dmitry Lokshantov<sup>1</sup>,**  
7 **Francesco Roncato<sup>1</sup>, Sergey Viukov<sup>1</sup>, Eitan Ariel<sup>1</sup>, Max Rose<sup>1</sup>, Nir Livnat<sup>1</sup>, Tom Shani<sup>1</sup>, Carine**  
8 **Joubran<sup>1</sup>, Roni Cohen<sup>1</sup>, Yoseph Addadi<sup>6</sup>, Merav Kedmi<sup>6</sup>, Hadas Keren-Shaul<sup>6</sup>, Sophie Petropoulos<sup>2-</sup>**  
9 **<sup>5</sup>, Fredrik Lanner<sup>2,3</sup>, Noa Novershtern<sup>1</sup> & Jacob H. Hanna<sup>1\*</sup>**

10  
11  
12 <sup>1</sup>Department of Molecular Genetics, Weizmann Institute of Science, Rehovot 76100, Israel

13 <sup>2</sup>Department of Clinical Sciences, Intervention and Technology, Ming Wai Lau Center for Reparative Medicine -  
14 Stockholm node, Karolinska Institutet, Stockholm, Sweden. <sup>3</sup>Division of Obstetrics and Gynecology, Karolinska  
15 Universitetssjukhuset, Stockholm, Sweden.

16 <sup>4</sup>Département de Médecine, Université de Montréal, Montréal Canada

17 <sup>5</sup>Centre de Recherche du Centre Hospitalier de l'Université de Montréal, Axe Immunopathologie, Montréal, Canada

18 <sup>6</sup>Department of Life Sciences Core Facilities, Weizmann Institute of Science, Rehovot 76100, Israel

19 <sup>7</sup>These authors contributed equally. \*Correspondence: Jacob H. Hanna ([jacob.hanna@weizmann.ac.il](mailto:jacob.hanna@weizmann.ac.il))

20

21

22

23

24

25

26

27

28

29

30

## 1 Abstract

2

3 **Our ability to study early human post-implantation development remains highly limited due**

4 **to the ethical and technical challenges associated with intrauterine development of the human embryo**

5 **after implantation. Despite the great progress made on human gastruloids, axiolooids and in vitro**

6 **cultured blastoids, such elegant models do not constitute an integrated Stem cell-derived Embryo**

7 **Models (SEMs) that includes all the key extra-embryonic tissues of the early post-implantation**

8 **human conceptus (e.g., hypoblast, yolk-sac, trophoblasts, amnion, and extraembryonic mesoderm),**

9 **and thus, do not recapitulate post-implantation epiblast development within the context of these**

10 **extra-embryonic compartments. Mouse naïve pluripotent stem cells (PSCs) have recently been shown**

11 **to give rise to embryonic and extra-embryonic stem cells capable of self-assembling into post-**

12 **gastrulation mouse SEMs, while bypassing the blastocyst-like stage, and eventually initiating**

13 **organogenesis *ex utero*. Here, we implement critical adaptations to extend these finding to humans,**

14 **while using only genetically unmodified human naïve PSCs, thus circumventing the need for ectopic**

15 **expression of lineage promoting transgenes. Such integrated human SEMs recapitulate the**

16 **organization of all known compartments of early post-implantation stage human embryos, including**

17 **epiblast, hypoblast, extra-embryonic mesoderm, and trophoblast surrounding the latter layers. The**

18 **organized human SEMs recapitulate key hallmarks of post-implantation stage embryogenesis up to**

19 **13-14 days post-fertilization (dpf, Carnegie stage 6a), such as bilaminar disk formation, epiblast**

20 **lumenogenesis, amniogenesis, anterior-posterior symmetry breaking, PGC specification, primary**

21 **and secondary yolk sac formation, and extra-embryonic mesoderm expansion that defines a**

22 **chorionic cavity and a connective stalk. This new platform constitutes a tractable stem cell-based**

23 **model for experimentally interrogating previously inaccessible windows of human peri- and early**

24 **post-implantation development.**

25

26

27

28

29

30

31

32

33

34

## 1 Introduction

2

3 Our understanding of human early post-implantation development has been limited due to  
4 difficulties in obtaining relevant embryo samples from these early stages of human gestation, and technical  
5 and ethical challenges for *in vitro* development of donated blastocysts towards the post-implantation stages  
6 while preserving the *in vivo* complexity of both embryonic and extra embryonic compartments<sup>1,2</sup>. Most of  
7 our knowledge of these stages has been gained solely from histological and anatomical descriptions in  
8 embryological collections, and the experimental models for mechanistic research are lacking<sup>3,4</sup>. Despite  
9 the important recent advances in culturing the *in vitro* attached human embryos beyond implantation, these  
10 culture systems are restricted in sample number and, overall, do not support normal development of  
11 embryos beyond the initiation of early epiblast lumenogenesis<sup>5-7</sup>.

12

13 The ability to capture human pluripotent stem cells (PSCs) in different developmental states in  
14 culture<sup>8-10</sup> has opened the possibility of investigating early human embryogenesis using 3D stem-cell  
15 derived embryo models. By controlling cellular composition and differentiation conditions, the recently  
16 introduced elegant models such as gastruloids, blastoids, axioids, or amniotic sac embryoids<sup>11-23</sup>  
17 recapitulate some aspects of early mammalian development in a modular manner. Among them, Blastocyst-  
18 like structures (blastoids) are the only currently available human integrated (i.e., comprised of all embryonic  
19 and extra-embryonic lineages) model of the human pre-implantation embryo, containing epiblast, primitive  
20 endoderm (PrE), and trophectoderm (TE)<sup>22-25</sup>. However, so far, the attempts to advance the blastoids  
21 towards post-implantation stages through *in vitro* culture did not progress beyond what has been achieved  
22 with natural human blastocysts<sup>5-7,22-25</sup>. Similarly, mouse blastoids do not develop into bona fide post-  
23 implantation embryos even when transferred *in utero*<sup>26</sup>.

24

25 Recently, mouse PSCs were shown to possess the ability to be coaxed *ex utero* into post-  
26 gastrulation-stage SEMs, by co-aggregation of non-transduced naïve PSCs with naïve PSCs transiently  
27 expressing the transcription factors Cdx2 and Gata4, to promote their priming towards TE and PrE lineages,  
28 respectively<sup>27,28</sup>. Such SEMs do not go through a blastocyst or an *in vitro* implantation-like stages but  
29 develop directly into egg-cylinder shaped SEMs within complex extra-embryonic compartments and are  
30 able to advance beyond gastrulation and reach early organogenesis stages of development as late as day  
31 E8.5<sup>27,28</sup>. These findings establish that naïve pluripotent cells<sup>29-31</sup> can serve as the sole source of embryonic  
32 and extra-embryonic tissues in advanced bona fide “organ-filled” embryo models, and thus may enable the  
33 generation of integrated SEMs from other mammalian species from which naïve PSCs have been stabilized,

1 including humans. Given that conditions for human naive pluripotency have been continually improved  
2 and optimized<sup>32–38</sup>, here we sought to test whether and how an equivalent approach could be implemented  
3 with human naive PSCs to obtain human post-implantation SEMs that unequivocally acquire anatomical  
4 compartments of pre-gastrulating human embryo with lineage marker expression and an adequate  
5 emergence of the key developmental milestones.

6

## 7 **Optimizing human naive PSC priming towards extra-embryonic lineages competent** 8 **for post-implantation SEM formation**

9

10 In mouse, deriving SEMs that contain critical embryonic and extraembryonic compartments  
11 requires optimal conditions and high-quality rapid induction of Primitive endoderm (PrE) and  
12 Trophectoderm (TE) from naive pluripotent stem cells (PSC), which was successfully achieved by ectopic  
13 expression of Gata4 and Cdx2, respectively<sup>27,28,39,40</sup>. The latter feat<sup>27</sup> offered the crucial and exclusive  
14 platform for us to demonstrate and unleash the self-organizing capacity of mouse stem cells to generate  
15 post-gastrulation bona fide synthetic embryos with both organs and extra-embryonic compartments in a  
16 unique ex utero set-up and only by starting from naive PSCs. This latter fact is of added importance, since  
17 it showed that the establishment of pluripotent stem cells only, may be sufficient to make advanced embryo-  
18 like structures in the petri dish from many mammals, including humans, without the need to derive TSC or  
19 PRE/XEN lines from human embryo derived material, some of which are not yet established in humans or  
20 did not prove competent to generate post-implantation mouse SEMs.

21

22 Hence, we first set out to establish a similar platform to obtain extraembryonic lineages through  
23 transient expression of these transgenes in human naive PSCs (**Fig. 1a**), while bearing in mind that the early  
24 post-implantation pre-gastrulation human, but not mouse, embryo already contains an extra embryonic  
25 mesoderm compartment (ExEM)<sup>41–47</sup>. To generate DOX (Doxycycline) inducible human PSCs for GATA4  
26 or GATA6, regulators of PrE in mouse<sup>48,49</sup> and of Pre and ExEM lineages in humans<sup>50</sup>, we used a  
27 PiggyBac system carrying M2Rtta and transcription factor of interest (**Extended Data Fig. 1a**).  
28 Monoclonal and polyclonal human ESC and iPSCs lines were validated for GATA4 or GATA6 expression  
29 upon DOX addition (**Extended Data Fig. 1b**). We aimed to use FACS staining for cell surface expression  
30 of PDGFR $\alpha$ , which marks both PrE and ExEM lineages in humans<sup>50</sup>, as an initial screening point for  
31 identifying optimal conditions to rapidly and efficiently induced PrE and/or ExEM cells, which will be  
32 followed by secondary characterization and validation. While Gata4 induction (iGata4) in mouse naive  
33 2i/LIF conditions yielded dramatic upregulation of PDGFR $\alpha$ + cell fraction after 48 hours of DOX



1 supplementation (**Extended Data Fig. 1c**)<sup>51</sup>, induction of GATA4 and GATA6 expression in human naive  
2 PSCs cultured in HENSM conditions, resulted <10% PDGFRa+ cells even after 6 days of follow-up (**Fig.**  
3 **1b, Extended Data Fig. 1d**). Since WNT stimulation by GSK3B inhibition via CHIR99021 (CH) has been  
4 shown to be the key stimulant for mouse and human PrE induction<sup>52-54</sup>, and given that CH is included in  
5 mouse, but not in recent human naïve media conditions<sup>35,55,56</sup>, we thought that HENSM conditions during  
6 the induction phase might not be suitable for human cells. Hence, we screened for other conditions to  
7 facilitate the induction of PDGFRa+ cells from naive human PSCs (**Fig. 1a**). The recently described mouse  
8 PrE-derivation conditions (termed C10F4PDGF)<sup>54</sup>, resulted in very low yield of PDGFRa induction  
9 (Fig.1c). RACL induction media (RPMI based medium supplemented with ACTIVIN A, CHIR99021 and  
10 LIF)<sup>57</sup> which has been used to prime human naïve PSCs towards PrE and ExEM state<sup>50,58</sup>, or NACL media  
11 (DMEM/F12/Neurobasal N2B27-based) that stabilizes naïve Endoderm (nEnd) cells generated in RACL  
12 conditions<sup>57</sup>, also led to low levels of PDGFRa+ cell fraction even after six days of induction in RACL  
13 (**Fig. 1c, middle**) or NACL (**Extended Data Fig. 1e**).

14  
15 Since ACTIVIN A is not required for priming cells towards PrE in mouse<sup>54</sup> and inhibits human  
16 naïve PSC in vitro differentiation into ExEM cells<sup>50</sup>, we omitted it from RACL condition (now termed  
17 RCL). Remarkably, RCL media resulted in up to 60% PDGFRa+ cells in iGATA4 cells and up to 80%  
18 PDGFRa+ from iGATA6 cells within 3-6 days (**Fig. 1c, right**). The slightly improved outcome when using  
19 Gata6 overexpression is consistent with previous reports placing Gata6 as the most upstream regulator of  
20 PrE identity in mouse and human cells<sup>48,59</sup>. Remarkably however, high efficiencies of PDGFRa+ cell  
21 formation was evident in RCL conditions from isogenic wild type (WT) cells without exogenous expression  
22 of GATA6 (**Fig. 1d**), indicating that the transient transgene expression is not required for efficient  
23 PDGFRa+ induction in human naïve PSC. Further optimization showed that 3 days of induction in RCL  
24 condition followed by 3 days incubation in basal N2B27 conditions yielded comparable results (**Fig 1d –**  
25 **right, Extended Data Fig. 1g**). Notably, incubating naïve PSCs in N2B27 media also yielded PDGFRa+  
26 cells albeit at significantly lower levels (**Fig 1d, left**), and thus we focused on using RCL conditions for  
27 further characterization analysis. The B27 supplement devoid of insulin in RCL was utilized herein as it  
28 yielded slightly higher efficiency in PDGFRa+ cell induction compared to B27 with insulin (**Extended**  
29 **Data Fig. 1f**), consistent with previous reports<sup>57</sup>.

30  
31 Our next step was to test for existence of PDGFRa+ PrE and/or ExEM cells in our RCL induction  
32 protocol and to distinguish between them. Both immunostaining and RT-PCR analysis validated  
33 endogenous expression of PrE marker genes in RCL conditions, including SOX17 which marks only the

1 PrE fraction, alongside GATA4, GATA6, and NID2 genes (**Extended Data Fig. 2 a, b**)<sup>57</sup>. Markers of  
2 definitive endoderm like GSC or HHEX were not induced from naïve PSCs in RCL conditions (**Extended**  
3 **Data Fig. 3a**) thus excluding definitive endoderm cell formation<sup>57</sup>. Applying RCL conditions on human  
4 isogenic primed PSCs yield predominant definitive endoderm marker expression (GSC or HHEX)  
5 (**Extended Data Fig. 1h**), consistent with previous findings<sup>57</sup>. Immunostaining results for SOX17 and  
6 BST2 markers that distinguish between PrE or ExEM lineages<sup>52,60</sup>, respectively, confirmed the co-  
7 emergence of PrE and ExEM from naïve PSCs under the same RCL induction protocol (with or without  
8 GATA6 overexpression) (**Fig. 1e, Extended Data Fig. 3b**). GATA4 positively marked both SOX17+ PrE  
9 and BST2+ ExEM populations as expected (**Extended Data Fig. 3c**)<sup>50</sup>. BST2+ ExEM cell identity was  
10 further validated by upregulation of FOXF1 protein which marks ExEM cells, but not PrE cells or residual  
11 PSCs (**Extended Data Fig. 3d**)<sup>61,62</sup>. Thus, we adopted RCL pre-treatment of naïve PSCs for co-  
12 aggregation experiments with other lineages (**Fig. 2b**).

13  
14 In parallel, we set out to find optimal conditions for deriving cells from the trophectoderm (TE)  
15 lineage that can adequately aggregate with the other lineages and develop into post-implantation stage  
16 human SEMs<sup>63</sup>. Overexpression of Cdx2, a master regulator of TE lineage, can lead to formation of TSC  
17 lines in mice<sup>39,64</sup>. Moreover, its overexpression in mouse naïve PSCs has been shown to be efficient in  
18 generating TSCs that remained viable and correctly integrated upon coaggregation with mouse naïve PSCs  
19 and iGata4 cells and generated both chorionic and ectoplacental cone placental lineages<sup>27,28</sup> (**Extended**  
20 **Data Figure 4a-b**). Cdx2 has also been shown to be transiently expressed in the TE of the human  
21 blastocysts and blastoids<sup>6,7,22,65</sup>. Therefore, we generated DOX inducible CDX2 human ESC and iPSC  
22 lines using a similar PiggyBac approach (**Extended Data Fig. 4c, d**), which were also subjected to lentiviral  
23 labeling with a constitutively expressed tdTomato marker to better track cell viability and integration  
24 patterns (**Extended Data Fig. 4e**). Remarkably, human iCDX2 cells pre-treated with DOX for 1 – 4 days  
25 in either naïve HENSM or in different validated human TE/TSC induction conditions: PALY medium  
26 (N2B27 supplemented with PD0325901, A83-01, and Y-27632)<sup>22</sup>, BAP(J) induction medium  
27 (DMEM/F12 based medium with ALK4/5/7 inhibitor A83-01, FGF2 inhibitor PD173074, and BMP4  
28 substituted with JAK inhibitor I after 24h)<sup>36,66</sup>, or TSC maintenance medium (TSCm)<sup>67</sup>, did not  
29 meaningfully contribute and expand within the aggregates generated with induced PrE/ExEM and PSCs.  
30 This can be judged by the loss of CK7+ or tdTomato-positive cells in early aggregates (**Extended Data**  
31 **Fig. 4f, h**), likely due to a drastically reduced viability of iCDX2 cells upon treatment with DOX in different  
32 conditions and clones used (**Extended Data Fig. 4i**), which was not encountered in mouse cells<sup>27,28,68</sup>.

1 iCDX2 cells also expressed low levels of trophoblast markers when compared to WT non-transgenic  
2 cells (**Extended Data Fig. 4g**)

3  
4 In the mouse SEM model, established embryo derived TSC lines can substitute the iCdx2-induced  
5 PSCs during aggregations without compromising the outcome<sup>27,69</sup>. Therefore, we then proceeded to test  
6 the established TSC lines derived from both naïve and primed hPSC<sup>70,71</sup>. To be able to trace cells after  
7 aggregation, TSC lines were either labelled with tdTomato via lentiviral transduction (**Extended Data Fig.**  
8 **5a**) or stained for CK7 expression. In all employed aggregation conditions with either primed (pTSC)  
9 (**Extended Data Fig. 5**) or naïve PSC derived TSC lines (nTSC) (**Extended Data Fig. 6**), the TSCs did  
10 not generate an outer layer surrounding the aggregate, but rather formed focal clumps (**Extended Data Fig.**  
11 **5b – e; Extended Data Fig. 6a – d**). The inability of human TSCs to integrate in putative SEMs, as opposed  
12 to mouse TSCs, might stem from the fact that mouse TSC lines are Cdx2+ and correspond to earlier stages  
13 of trophoblast development, than those isolated from human naïve or primed TSCs which are CDX2-  
14 negative<sup>70–74</sup>.

15  
16 Recent studies suggest that GATA3 might have an important role for human TE induction<sup>75</sup>,  
17 thereby, we also established and tested induced GATA3 (iGATA3) human PSCs lines (**Extended Data**  
18 **Fig. 7a–c**) and compared them to differentiation conditions using isogenic genetically unmodified cells.  
19 RT-qPCR analysis showed higher expression levels of CDX2 and TACSTD2 in the non-transduced group  
20 under BAP(J) conditions (**Extended Data Fig. 7d**). Immunofluorescence staining revealed that although  
21 GATA3 overexpression induced endogenous expression of GATA2 TE marker, the cells did not uniformly  
22 express TFAP2C, CDX2, and CK7, while in the absence of transgene overexpression we observed higher  
23 and uniform expression of TFAP2C, CDX2, and higher occurrence of CK7 positive cells under BAP(J)  
24 conditions (**Extended Data Fig. 7e, f**). Flow cytometry analysis for TACSTD2 (marker of early and late  
25 TE) and ENPEP (expressed only in the late TE) showed the highest percentage of a double positive  
26 population in non-transduced cells under BAP(J) conditions (**Fig. 1f; Extended Data Fig. 7g, right**)<sup>73</sup>.  
27 Addition of BMP4 on the first day of induction showed homogeneous double positive population while  
28 exclusion of BMP4 showed that almost half of the population was ENPEP negative (**Extended Data Fig.**  
29 **7g, right**), consistent with a previous report<sup>36</sup>. Notably, following the induction and aggregation with naïve  
30 PSCs and PrE/ExEM, iGATA3 cells remained viable but did not surround the aggregates (**Fig. 1g, left**). In  
31 contrast, TE derived from genetically unmodified naïve PSC under the same BAP(J) protocol, uniformly  
32 surrounded the aggregates (**Fig. 1g, right**), which is a critical criterion expected to be fulfilled in integrated  
33 SEM<sup>76</sup>. It is possible that the high ectopic expression produced by the PiggyBac system of GATA3 or  
34 CDX2, in addition to the endogenous levels induced by the media used, leads to unfavorably high levels of

1 such factors which might derail the differentiation outcome, and is consistent with the findings in mouse  
2 SEMs that cautioned from using highly expressing Cdx2 transgenic clones when generating mouse  
3 TE/TSCs<sup>76,77</sup>. The ability to derive relevant extra-embryonic lineages from genetically unmodified WT  
4 human naïve PSCs are without the need for transgene overexpression are in line with the recent studies  
5 demonstrating that human naïve pluripotent cells can be more easily coaxed to give rise to early progenitors  
6 of PrE cells and TSCs when compared to mouse PSCs, which so far require ectopic transcription factor  
7 overexpression<sup>35,36,58,74</sup>. The latter is consistent with the observation that enhancers<sup>78</sup> of key TE and PrE  
8 regulators (GATA3, GATA6, GATA4) are accessible in human, but not mouse naïve PSCs while being  
9 transcriptionally inactive in both (**Extended Data Figure 8**).

## 11 **Human Post-Implantation SEM self-assembled exclusively from non-transgenic naïve PSCs**

13 Having established fast and efficient *in vitro* induction of the three extraembryonic lineages  
14 comprising the pre-gastrulating natural human embryo, we proceeded to test their capacity to form embryo-  
15 like structures solely from naïve pluripotent stem cells (nPSC) (**Fig. 2a**). To this end, we calibrated the  
16 aggregation conditions, such as cell numbers needed and ratios within cell mixtures (**Extended Data Fig.**  
17 **9a-c**), and the aggregation and growth media composition for different stages of SEM development  
18 (**Extended Data Fig. 10**). Unlike for mouse where FBS presence in the first 3 days of SEM formation was  
19 critical<sup>27,79</sup>, serum free conditions were found favorable for human SEM (**Extended Data Fig. 10b, c**).  
20 The protocol starting with 120 cells aggregated at the ratio 1:1:3 (nPSC: PrE/ExEM: TE) in basal N2B27  
21 conditions supplemented with BSA, which was found critical to reduce human aggregate stickiness  
22 (**Extended Data Fig 11a**)<sup>80</sup>, for three days resulted in optimal aggregation, validated by the presence of  
23 epiblast and extra-embryonic lineages in the aggregates via immunostaining (**Extended Data Fig. 12a**). To  
24 further support unrestricted growth of the SEM and prevent TE attachment to the 2D surface, which disrupts  
25 the morphology after day 3 of the protocol, we had to continue our culture using orbital shaking conditions  
26 and optimal medium volume per well (**Extended Data Fig. 11b-d**)<sup>27</sup>. The composition of the Ex-Utero  
27 Culture Media 2 (EUCM2) was adapted from the mouse SEMs protocol<sup>27</sup>, while using here incremental  
28 FBS concentrations, ranging from 20% at day 3, 30% at day 4-6, and 50% at day 6-8, which were found  
29 most optimal for human SEM growth (**Fig. 2b, Extended Data Fig. 12a-b**). We did not observe an  
30 improved outcome when using roller-culture applied after day 6 with the same media composition,  
31 compared to orbital shaking placed in static incubators (**Extended Data Fig. 11e**)<sup>27</sup>, which is consistent  
32 with observations in mice where roller culture platform was needed particularly for late gastrulation and  
33 organogenesis stages<sup>81</sup>.

1  
2 To study the development of our human SEMs in further detail and with an adequate reference, we  
3 mostly relied on the data from the Virtual Human Embryo Project based on the Embryo Carnegie Stages as  
4 the most detailed and relevant source available to date <sup>82,83</sup> (see Methods). During eight days of *ex utero*  
5 culture, the aggregates grew extensively, forming a 3D spherical structure with evident tissue compartments  
6 and inner cavities (**Fig. 2c**), which we then aimed to characterize in more detail by immunofluorescence  
7 (**Video S1**). Strikingly, human SEM did not only express the respective lineage markers, but also  
8 established the structures morphologically characteristic of *in utero* implanted embryos (**Fig. 2d, f**). From  
9 the beginning of the *ex utero* culture, SEMs became surrounded by the Trophoblast (Tb) compartment,  
10 marked by GATA3, CK7, and SDC1 that marks syncytiotrophoblast (STB) (Days 3, 4; **Fig. 2d, left;**  
11 **Extended Data Fig. 12a – c**), which is reminiscent of human early *in utero* development by 8 dpf (day  
12 post-fertilization) or Carnegie Stage 5 (CS5) (**Fig. 2a, left**). At this stage, the implanting embryo starts to  
13 become surrounded by a layer of syncytiotrophoblast (STB), which directly invades maternal endometrium  
14 and supports future histotrophic nutrition of the embryo. Notably, the co-aggregation protocol devised  
15 herein does not result in a blastocoel cavity formation nor in a condensed ICM-like structure, as opposed  
16 to human and mouse blastoid models (**Extended Data Fig. 13a-h**), indicating that human SEMs do not go  
17 through a blastocyst-like stage, in agreement with observations in mouse SEM protocol (**Extended Data**  
18 **Fig. 13i-j**) <sup>27,79,84,85</sup>. The efficiency of correctly organized human SEM was estimated at day 6 to be 2.9%  
19 of the starting aggregates as judged by co-immunofluorescence for lineage markers and meeting  
20 morphology criteria (see Methods) (**Fig. 2e, Extended Data fig 12c-d**). We note that the human SEMs  
21 show a large degree of asynchrony, with up to 2 days difference in developmental staging for SEMs found  
22 at day 6-8, leading to some more advanced and some earlier structures when evaluating SEMs at a specific  
23 time point. Starting the human SEM protocol with human primed, rather than naïve, PSCs did not generate  
24 equivalent SEMs (**Extended Data Fig. 9d**), as also seen in mouse models <sup>27,86</sup>.

25  
26 In human and non-human primates (NHP), the inner cell mass segregates into two lineages, the  
27 epiblast (Epi), formed by columnar cells expressing OCT4 <sup>5–7,87</sup>, and the hypoblast located underneath the  
28 Epi (Hyp, comprised of cuboidal cells expressing SOX17, GATA6, GATA4, PDGFRa) <sup>88–90</sup> (CS4-5a, **Fig.**  
29 **2a**). Importantly, in our human SEM, Epi and PrE cells segregated into two distinct compartments,  
30 differentially expressing the respective lineage marker genes (OCT4 and SOX17) (**Fig. 2d**). Both Epi and  
31 Hyp were surrounded by the Tb, marked by CK7 starting from day 3 (**Fig. 2d, Extended Data Fig. 12a**),  
32 and SEMs drastically advanced morphologically by day 6 (**Extended Data Fig. 12b**). In particular, the Epi  
33 initiated formation of the amniotic cavity (AC), whilst the hypoblast formed a yolk sac (YS) cavity,

1 establishing a bilaminar structure in between (**Fig. 2d, middle; Extended Data Fig. 12b**) reminiscent of  
2 the 9-10 dpf human embryo (CS5b, **Fig. 2a**).

3  
4 The early post-implantation pre-gastrulating human embryo already contains some extraembryonic  
5 mesoderm (ExEM)<sup>41–47,91</sup>. The ExEM contributes to all fetal membranes and participates in formation of  
6 blood and placental vasculature<sup>91,92</sup>. ExEM tissue becomes abundant between the primary yolk sac (PYS)  
7 and the Tb by CS5a, forming a chorionic cavity (ChC) underneath the PYS by CS5c (11 dpf, **Fig. 2d –**  
8 **middle scheme**). The latter was also observed upon close examination of day 6 SEMs, revealing the  
9 presence of a cavity formed by an additional tissue layer between the YS and the Tb, that corresponds to  
10 ChC, similar to what has been characterized in natural human embryos corresponding to these stages (**Fig.**  
11 **2c, d**). Later on, the ExEM expands allowing the remodeling of the PYS into becoming what is termed the  
12 secondary yolk sac (SYS) and formation of a connective stalk (St), the structure that crosses through the  
13 chorionic cavity and holds the bilaminar disc to the chorion and later forms the umbilical cord (Florian,  
14 1930). In human SEMs, we also observed 3D expansion of all the above mentioned lumina and growth of  
15 the extraembryonic tissues (**Fig. 2c-d, f**), suggesting differentiation and remodeling of the PYS into SYS  
16 alongside ExEM expansion, and formation of a connective stalk (**Fig. 2d, f; Video S1; Extended Data Fig.**  
17 **14**).

18  
19 By 11-12 dpf (CS5c) in human embryos, the embryonic disk segregates into a ventral  
20 pseudostratified epiblast and a dorsal squamous amnion (Am) (**Fig. 2a, right panel**). The bilaminar epiblast  
21 will give rise to the embryo proper, whereas the amnion will comprise the protective membrane surrounding  
22 the fetus until birth<sup>94</sup>. Strikingly, starting from day 6 and until day 8 of the *ex utero* culture (D6 – D8  
23 SEMs), the dorsal segment of the epiblast acquired squamous morphology resembling the amnion-like  
24 layer, and the bilaminar structure adapted a disk shape (**Fig. 2d, f; Extended Data Fig. 14; Video S1**),  
25 resembling the key hallmark of the *in utero* human post-implantation development in preparation for  
26 gastrulation. Altogether, our approach exploits the developmental plasticity of genetically unmodified  
27 transgene-free human naïve PSCs, demonstrating their capacity to self-assemble into early post-  
28 implantation human embryo models that comprise both embryonic and extraembryonic compartments, as  
29 we characterize and validate further below.

30  
31 **Human SEMs undergo epiblast morphogenesis and form a bilaminar disk, amnion and**  
32 **PGCs**

33



1 We then aimed to characterize development of key lineages in SEMs in more detail. As the epiblast  
2 is derived from initially naïve PSCs, we checked whether they undergo priming after co-aggregation with  
3 other lineages and being placed in N2B27 basal conditions. Indeed, shortly after co-aggregation, we noted  
4 loss of expression of naïve marker genes (DNMT3 and STELLA) that were originally expressed in the  
5 starting naïve PSCs in HENSM conditions (**Fig. 3a**), and upregulation of the primed pluripotency marker  
6 OTX2 by day 3, alongside maintaining the expression of OCT4 and SOX2 pluripotency factors that mark  
7 both naïve and primed pluripotency states (**Fig. 3a, b**)<sup>95,96</sup>. Consistent with developmental progression, by  
8 day 4, PSCs formed an evident epiblast tissue inside the SEM which considerably grew during subsequent  
9 development (**Fig. 3c, Video S2**). Electron micrographs of the *in utero* rhesus monkey embryos indicate  
10 Epi polarization approximately at the time of implantation<sup>97</sup>. *In vitro* attached and cultured (IVC) human  
11 blastocysts showed Epi polarization and lumenogenesis (evident by apical Podocalaxyn localization)  
12 starting from 10 dpf<sup>5</sup>, while in our SEM, the Epi established apicobasal polarity from day 6, as judged by  
13 the apical localization of phosphorylated Erzin, Podocalaxyn (**Fig. 3e**), and aPKC (**Extended Data Fig.**  
14 **15a**), as well as alignment of the Epi cells towards the emerging cavity (**Extended Data Fig. 15b**). The  
15 timing of lumenogenesis at day 6 also corresponded to a significant increase in the Epi cell number (**Fig.**  
16 **3d**), in agreement with the histological descriptions of the *in utero* human embryo<sup>82</sup>.

17  
18 Early emergence of the anterior-posterior (AP) axis is prevalent in mammals when a proportion of  
19 Epi cells initiates expression of BRACHYURY (T) at the prospective posterior side of the embryonic disk  
20<sup>98</sup>. We also checked for the expression of BRACHYURY (T) in human SEMs and identified a  
21 T/BRACHYURY-positive population of Epi cells in the posterior part of the SEM epiblast (**Fig. 3f,**  
22 **Extended Data Fig 15d**). The emergence of the anterior visceral endoderm (AVE), which constitutes the  
23 anterior signaling center for epiblast patterning, was seen by the expression of CER1 in the Epi-adjacent  
24 part of the VE from day 6 (**Extended Data Fig. 15c, d**). The previously known vesicular staining pattern  
25 of CER1<sup>99,100</sup> was evident in human SEMs (**Extended Data Fig. 15c**). Co-immunostaining for these  
26 markers further supported establishment of the AP axis and symmetry breaking by day 8 in human SEMs,  
27 where T/BRA-positive Epi cells were found in the region opposite to Cer1-positive AVE (**Fig. 3f**).

28  
29 From day 6 on, the Epi exhibited patterning of early amniotic sac formation with a dorsal squamous  
30 cell population corresponding to the putative amnion, and ventral columnar pseudostratified epiblast cells  
31 (**Extended Data Fig. 15e, f**). Co-immunostaining for TFAP2A and ISL1 in day 8 SEMs, revealed their co-  
32 localization in multiple squamous dorsal cells, also depleted of SOX2 expression, confirming their amnion  
33 identity by localization, morphology, and gene expression (**Fig. 3g; Video S3**)<sup>101–104</sup>. Based on the cell

1 morphology and localization, amnion can be distinguished from the rest of the Epi between 10 and 12 dpf  
2 of human *in utero* development<sup>82</sup>. Moreover, by day 8 in SEM, the Epi acquired an apparent disk shape  
3 with an enlarged amniotic cavity, while the amnion formed a thinner squamous shaped epithelium highly  
4 resembling *in utero* embryo morphology as documented in Carnegie collection at CS6a (**Fig. 3h – k, Video**  
5 **S3**). Lastly, we asked whether advanced *in utero*-like development of the embryonic disk would also lead  
6 to induction of early primordial germ cells (PGCs)<sup>105,106</sup>, as was seen in mouse SEMs derived from naïve  
7 PSCs<sup>27</sup>. Co-immunostaining for several PGC markers identified a rare population of cells positive for  
8 OCT4, SOX17, and BLIMP1 in the dorsal Epi region of the SEM at day 8 (**Fig. 3l; Extended Data Fig.**  
9 **15g**), which unequivocally constitutes a specific signature of human PGCs<sup>107–109</sup>.

10

### 11 **Human SEMs recapitulate development of yolk sac and scaffolding of the chorion cavity by** 12 **the extra-embryonic mesoderm.**

13

14 The yolk sac starts forming from the hypoblast between CS4 and CS5 in human. The part of  
15 hypoblast located underneath the epiblast (forming a characteristic bilaminar disc), belongs to the visceral  
16 endoderm (VE) and is a dynamic signaling center for epiblast patterning. It is connected to the parietal  
17 endoderm (PE), forming the inner cavity, primary yolk sac (PYS), which becomes reorganized during  
18 development<sup>42,46</sup>. Eventually, yolk sac serves multiple functions for the growing embryo, supplying  
19 nutrients, and the blood cell progenitors during the embryonic period until the placenta takes over<sup>42</sup>.  
20 Formation of the yolk sac cavity was frequently seen in structures with all segregated lineages and became  
21 more prominent at day 6 of the *ex utero* development (**Fig. 4**). Once formed, SOX17-positive yolk sac was  
22 comprised of the columnal VE in the Epi proximity, and the squamous PE lining the opposing side of the  
23 cavity (**Fig. 4a – c**), recapitulating VE and PE cell morphology in PYS of CS5c natural embryos (**Fig. 4c**).  
24 Both VE and PE acquired apicobasal polarity, as judged by the apical localization of aPKC (**Extended**  
25 **Data Fig. 16a; Video S4**), which agrees with the electron micrographs of the hypoblast cell morphology  
26 in implantation stage rhesus monkey embryos<sup>97</sup>. Consistent with polarity, cell shape, and localization in  
27 natural embryos, SOX17-positive hypoblast also co-expressed primitive endoderm markers GATA6 and  
28 GATA4 (**Fig. 4d, e; Extended Data Fig. 16d**).

29

30 Next, we aimed to characterize the above mentioned OCT4-negative and SOX17-negative cell  
31 population beneath the yolk sac (**Fig. 2d**). Interestingly, these cells had mesenchymal rather than epithelial  
32 morphology, extending cell protrusions towards the surrounding tissues and forming an intermediate mesh-  
33 like 3D structure (**Extended Data Fig. 16b**). We then checked the expression of multiple lineage-specific



1 transcription factors, differentially marking ExEM vs. YS during the relevant stages in marmoset embryos  
2 <sup>90</sup>. The ExEM cells expressed GATA6 and GATA4, but not SOX17 (**Fig. 4e; Extended Data Fig. 16d, e**),  
3 consistent with the ExEM expression profile from marmoset embryos <sup>90</sup> (**Extended Data Fig. 16c**) and  
4 human PSC in vitro derived ExEM cells <sup>50</sup>. The observed lower GATA6 level in ExEM cells compared to  
5 PrE cells (**Fig. 4e, Extended Data Fig. 16d**), is also in agreement with the expression for those lineages in  
6 the *in utero* marmoset embryos <sup>90</sup> (**Extended Data Fig. 16c**). Immunostaining for additional mesenchymal  
7 markers, such as BST2 <sup>50</sup>, VIM <sup>87,110</sup> and FOXF1 <sup>62</sup>, which allow distinguishing ExEM from PrE, further  
8 validated the ExEM Identity of these cells in day 6 – 8 SEMs (**Fig. 4f-g, Extended Data Fig. 16e-f; Video**  
9 **S5**). Hence, we concluded that the inner cavity of the ExEM represents the chorionic cavity, which is formed  
10 by remodeling of a mesh like population of mesenchymal cells predominantly visible starting from day 6  
11 SEMs that corresponds to the human extraembryonic mesoderm.

12  
13         Histological descriptions of human and NHP embryos suggest the remodeling of the PYS cavity  
14 by the ExEM expansion with a subsequent pinching off and vesiculation of the PYS remnants, resulting in  
15 the formation of the secondary yolk sac (SYS) <sup>46</sup>. In some of the day 8 SEMs, BST2 and FOXF1 positive  
16 cells formed a complex filamentous meshwork with multiple cavities, contributing to the SEM complex  
17 architecture (**Fig. 4h, i; Extended Data Fig. 17**). Closer examination of these structures revealed clusters  
18 of SOX17 positive cells entrapped between ExEM cells, suggesting residual PYS cells after the tissue  
19 remodeling (**Fig. 4j-k; Extended Data Fig. 17**). Moreover, an ExEM cell population connecting the  
20 bilaminar disk to the trophectoderm could be seen in day 8 SEMs, resembling a connective stalk structure  
21 (**Fig. 4h-I, Fig. 2d, Extended Data Fig. 14**), which contributes to the future umbilical cord in natural  
22 human embryos <sup>93</sup>.

23

## 24 **Trophoblast integration and maturation in human SEMs**

25

26         *In utero*, the human embryo develops surrounded by the trophoblast, which is essential for truly  
27 integrated experimental models of early implantation-stage development. The early days of trophoblast  
28 development during implantation are partially characterized in human *in vivo*. The fusion of trophoblast  
29 leads to formation of an outer syncytium, morphologically seen shortly after implantation on the earliest  
30 Carnegie data. Immunofluorescence analysis shows that the majority of human SEMs generated with our  
31 protocol are surrounded by the trophoblast with very high efficiency (79-84%), expressing multiple  
32 trophoblast marker genes, such as GATA3, CK7, and SDC1, the latter being characteristic for syncytium  
33 (**Fig. 5a; Extended Data Fig. 18a-d**) <sup>36</sup>. Marker gene expression and cell morphology further indicated

1 that the outer trophoblast layer is formed by syncytiotrophoblast, confirming the development of post-  
2 implantation trophoblast in human SEMs (**Fig. 5a; Extended Data Fig. 18a-d**). Notably, SDC1 is not  
3 expressed on the starting TE cells upon BAP(J) induction prior to the aggregation, indicating that  
4 maturation of the TE cells occurs in the aggregates (**Extended Data Fig. 7e**).

5  
6 The lacunar phase of trophoblast development begins around 14 dpf, when the fluid-filled spaces  
7 form within the trophoblast syncytium, merging and partitioning the trophoblast into trabeculae<sup>111</sup>, later  
8 contributing to the placental villi (**Fig. 5b**). Remarkably, we observed multiple cavities with variable sizes  
9 forming inside the syncytiotrophoblast and were predominantly located at the SEM periphery (**Fig 5b-d, e**  
10 **top panel; Video S6**), which resembled the trophoblast lacunae on the embryo periphery in utero at CS5c  
11 (**Fig. 5d**).

12  
13 Another important function of the trophoblast syncytium is production of the hormones, such as  
14 human chorionic gonadotropin beta (HCGB), which maintains multiple physiological aspects of pregnancy.  
15 The immunostaining for HCGB demonstrated abundance of the hormone protein in surrounding trophoblast  
16 cells of the SEM, enriched inside the intracellular vesicles<sup>36</sup> (**Fig. 5c; Extended Data Fig. 18e**). We  
17 additionally confirmed its secretion by detection of soluble HCG in media in which day 7 SEMs were  
18 placed for 24h until day 8 (**Extended Data Fig. 18g**). Lastly, we checked whether the syncytium in our  
19 SEMs is multinuclear, as it is typically seen during early placental development<sup>112</sup>. Phase-images alongside  
20 co-immunostaining of the trophoblast marker SDC1 enabled us to see clearer the trophoblast cell shape  
21 forming a layer of thick outer syncytium (**Fig. 5e, bottom**). Co-immunostaining with F-ACTIN, that helps  
22 define individual cell membrane boundaries, and DAPI, showed that the trophoblast syncytium indeed has  
23 multiple nuclei (**Fig. 5f; Extended Data Fig. 18f**). Collectively, these findings confirm proper integration,  
24 maturation, and localization of Tb cells in our SEMs.

## 25 26 **scRNA-seq analysis validates human SEM cellular composition and identity**

27  
28 To further validate and examine the milieu of cell types present in the human SEMs generated  
29 herein in a more unbiased manner, we performed a single cell transcriptomic analysis by Chromium 10X  
30 scRNA-seq on selected day 4, 6 and 8 SEMs. We analyzed ~4,000-8000 cells from pooled high-quality  
31 SEMs manually selected at these experimental timepoints. After quality control and strict filtering, a total  
32 of 12,190 single cells were used for subsequent analyses (**Extended Data Fig. 19a-c**). Uniform Manifold  
33 Approximation and Projection (UMAP) analysis using Seurat package identified a total of 13 separate cell  
34 clusters (**Fig. 6a**). Cluster annotation was performed based on expression (+) or lack-of expression (-) of

1 previously defined lineage-specific markers that allowed us to annotate all 13 identified cell clusters (**Fig.**  
2 **6 b,c**): Epiblast (Epi – in total four clusters: OCT4+, SOX2+), Yolk-Sac/Hypoblast (YS/Hb – in total three  
3 clusters: SOX17+, APOA1+, LINC00261 in addition to GATA6+, GATA4+, PDGFRA+), Extra embryonic  
4 mesoderm (ExEM – in total four clusters: FOXF1+, VIM+, BST2+, in addition to GATA6+, GATA4+,  
5 PDGFRA+), amnion (Am – one cluster: ISL1+, GABRP+, VTCN1+), and trophoblast (Tb - one cluster:  
6 GATA3+, SDC1+, CPM+) (**Fig. 6a,b**).

7  
8 From the four annotated Epi clusters (all expressing CD24 primed pluripotency marker alongside  
9 OCT4 (POU5F1) and SOX2 (**Extended Data Figure 20a- top row**), we subclassified two of them. The  
10 first one, which we termed Posterior epiblast cluster (cluster 4), was marked by upregulation of TBXT  
11 (BRACHYURY/T), co-expression of MIXL1, EOMES, MESP1 and WNT8A (**Extended Data Fig. 20a,**  
12 **second row**), which are all markers of epithelial to mesenchymal transition (EMT) process, known to  
13 accompany upregulation of brachyury during peri-gastrulation in mammalian species<sup>113</sup>. The second Epi  
14 subcluster (cluster 7) we termed as “committed epiblast” as it was marked by upregulation of ZIC2, ZEB2  
15 and VIM lineage commitment marker expression, and absence of NANOG while maintaining OCT4 and  
16 SOX2 pluripotency markers (**Extended Data Fig. 20a, bottom row**). Rare PGCs  
17 (POU5F1+PRDM1+SOX17+ cells) (n=27) could be also identified within epiblast clusters, most of them  
18 (n=19) in cluster 4 (**Fig. 6d**). The fact that PGCs did not create their own subcluster likely results from their  
19 relative scarcity within SEMs, as was observed in mouse SEMs<sup>76,114</sup>. However, these markers are definitive  
20 for human PGC identity<sup>115</sup> and confirm our immunostaining based detection results for human PGCs in  
21 SEMs (**Fig. 3I**). Although we had technical problems in maintaining high trophoblast viability and recovery  
22 following SEM enzymatic dissociation, we still observed a well separated cluster expressing lineage  
23 markers of trophoblast identity (Tb- cluster 12) (**Extended Data Fig 20b**). While amnion cells can share  
24 certain markers with Tb (like GATA3 and TFAP2A)<sup>87,101</sup>, they formed a separate cluster which also  
25 expressed amnion markers like ISL1, GABRP and VTCN1, that are specific to amnion but not to Tb  
26 (**Extended Data Fig. 20c**)<sup>27</sup>. The latter is consistent with amnion immunostaining results in human SEMs  
27 shown herein (**Fig. 3g**). It has been hypothesized that human amnion might be a significant source of BMP4,  
28 analogous to the extra embryonic ectoderm in mice that serves as a signaling secreting source of Bmp4 and  
29 Furin secretion<sup>87,103,116</sup>. We note that in our scRNA-seq data BMP4 and FURIN are expressed in a fraction  
30 of human SEM derived amnion cells (**Extended Data Fig. 20d**).

31  
32 Among the three different yolk-sac (YS) clusters that commonly expressed GATA4, GATA6,  
33 PDGFRA and APOA1 (clusters 3,5 and 9), we found that recently identified markers of secondary yolk-  
34 sac (SYS) in marmoset<sup>90</sup>, TTR, APOB and GSTA1, are expressed more specifically only in cluster 9,

1 supporting its subclassification as SYS (**Extended Data Fig. 21a, Fig. 6a**). STC1, LHX1 are absent in SYS  
2 (cluster 9), but not in primary yolk-sac (clusters 3 and 5) also consistent with findings in marmoset.<sup>90</sup> Lack  
3 of uniform HHEX and GSC among most cells in all YS clusters, is consistent with primitive, rather than  
4 definitive, endoderm identity for these three YS related clusters (**Extended Data Fig. 21a**)<sup>52</sup>. The co-  
5 expression of DKK1 and LHX1 detected via scRNA-seq alongside CER1 expression among some of the  
6 SOX17+ cluster 3 YS/Hb cells, supports the validity of AVE cell identity in SEMs (**Extended Data Fig.**  
7 **21a – black arrows in second row**). Among the four identified ExEM clusters, based on FOXF1 and BST2  
8 expression (**Fig. 6b**), HAND1, LEF1 and BMP4 were also expressed consistent with  
9 mesenchymal/mesodermal like identity (**Extended Data Fig. 21b**). However, we noted that ExEM clusters  
10 0 and 6, but not ExEM cluster 2 and 8, expressed significantly higher levels of extra cellular matrix related  
11 genes (COL3A, COL1A1, COL1A2, COL6A2 and FIBRONECTIN1 (FN1)) (**Extended Data Fig. 21b-c**)  
12 suggesting the possibility that that ExEM clusters 2 and 8 might represent a relatively earlier and less mature  
13 ExEM lineage identity. While ExEM cluster 8 cells express CER1, DKK1 and LHX1 AVE markers, they  
14 lack other key VE/AVE markers like SOX17 and APOA1 and thus were not annotated as AVE, but rather  
15 as EXEM cells as they predominantly express mesenchymal signature (**Extended Data Fig. 21a – second**  
16 **row; b-first row**). The latter is consistent with CER1, DKK1 and LHX1 being co-expressed also in extra-  
17 embryonic mesodermal cells as detected in primate<sup>90</sup> and gastrulating human embryo datasets<sup>117</sup>.

18  
19 We next conducted a comparison analysis of the transcriptional profile of cells in the human SEMs  
20 dataset to an integrated human embryonic reference<sup>101</sup> consisting of 5 human embryonic data sets spanning  
21 *in vitro* cultured human blastocysts<sup>24,118,119</sup>, 3D- *in vitro* cultured human blastocysts until pre-gastrulation  
22 stages<sup>120</sup>, and a Carnegie Stage 7 (CS7) 16-19dpf human gastrula<sup>117</sup> (**Fig. 6e**). UMAP projection confirmed  
23 the annotated identity of the SEM clusters and validated their resemblance to the transcriptome and cell  
24 type composition of early post-implanted human embryos, including those derived following *in vitro*  
25 attached growth (**Fig. 6e; Extended Data Fig. 19d, e**). Projection of SEMs cells onto the human embryonic  
26 reference further highlighted that the transcriptional profile of cells differed from human pre-implantation  
27 embryos as expected, and all cells corresponded to a post-implanted lineage (Fig. 6e). This analysis  
28 validated the detection of post-implantation Epi, YS, ExEM and Tb, as well as emergence of other  
29 transcriptomic states, such as amnion, Hb/YS and posterior Epi (**Fig. 6e; Extended Data Fig. 19d, e**).  
30 Overall, despite of the known limitations of cross-dataset, cross-platform comparisons, the single cell  
31 transcriptomic analysis presented above supports the conclusion that human SEMs recapitulate lineage  
32 differentiation of the early human post-implantation embryo.

33

## 34 Discussion

1  
2           Studying early human post-implantation development is crucial for understanding the basis of  
3 normal human embryogenesis as well as developmental birth defects, since around a third of human  
4 pregnancies fail between implantation and the fourth week of gestation <sup>121</sup>. Moreover, it is becoming  
5 increasingly clear that devising and optimizing protocols for 2D *in vitro* human ESC and iPSC  
6 differentiation into mature cell types, would greatly benefit from understanding the key mechanical,  
7 transcriptional, and signaling pathways active during early embryogenesis, to further improve the quality  
8 and efficiency of differentiation protocols <sup>122</sup>. Such research endeavors would require large numbers of  
9 donated human embryo derived materials from early post-implantation stages but justified ethical barriers  
10 and the scarcity of such samples, make conducting the mechanistic human embryo-based research ethically  
11 and technically challenging. Given the capacity to generate stem cells from human embryonic and  
12 extraembryonic components, generating a human stem-cell derived model capable of mimicking the key  
13 developmental milestones occurring during the early post-implantation stages is becoming a necessary key  
14 element of a growing toolbox of SEMs<sup>1,2</sup>.

15  
16           Here, we readapted an equivalent approach to that recently described in mice <sup>27,28</sup> and generated  
17 self-organizing human post-implantation SEMs exclusively from naïve PSCs, but without the need to  
18 genetically modify or overexpress exogenous lineage factors for priming the naïve PSCs towards the three  
19 different extra-embryonic lineages prevalent at these developmental stages, contrary to what is currently  
20 still inevitable in mouse SEM derivation protocols <sup>27,28</sup>. The latter finding further underscores the self-  
21 organization capability of naïve pluripotent stem cells to generate both embryonic and all extra-embryonic  
22 compartments <sup>36,50,57</sup>, including the ExEM found in human, but not mouse, early pre-gastrulation stages.  
23 The human SEMs generated herein mimic the 3D architecture and key developmental landmarks of *in utero*  
24 developed natural human embryos from day 7-8 to day 13-14 post-fertilization (Carnegie stage 5a-6a). We  
25 observed proper spatial allocation of cell lineages into defined embryonic and extra-embryonic  
26 compartments in the complete absence of fertilization or interaction with maternal tissues and without the  
27 need of providing external targeted signaling pathway induction during the self-organization of the  
28 aggregated cells.

29  
30           The fact that human (and mouse) SEM formation bypasses the blastocyst-like stage and that the *ex*  
31 *vivo* protocols for growing natural human blastocysts into the authentic 14 dpf stage are still lacking, makes  
32 donated fetal materials from 7-14 dpf as the only relevant control for benchmarking the SEM describe  
33 herein. Obviously, obtaining new 7-14 dpf human embryo samples is not a viable option from both technical  
34 and ethical reasons. However, this limitation is partially mitigated by the available Carnegie and other

1 embryo atlas collections<sup>82,83</sup>, as well as the ability to compare human development to NHP embryo models  
2 and datasets. Moreover, we emphasize that we are only trying to make a reproducible embryo model with  
3 recognizable recapitulation of the key milestones and the critical embryonic structures, which will be  
4 helpful for research purposes even if it does not entirely resemble the natural human embryo. At the level  
5 of structure, our human SEM resembles the situation in utero.

6

7 Naïve pluripotent stem cell growth conditions typically utilize FGF/MEK signaling inhibition,  
8 which leads to the loss of imprinting after extended passaging<sup>123,124</sup>, perturbing the developmental potential  
9 of such cells and thus might partially underlie the low efficiency yield and SEM quality. This risk may  
10 possibly be mitigated in the future by using naïve conditions with titrating down the concentration of  
11 FGF/MEK pathway inhibitors or using alternative naïve conditions that do not target this pathway<sup>123,125</sup>. At  
12 this moment, the reduced efficiency and heterogeneity observed during the formation of human SEMs is a  
13 complicating factor that needs to be overcome to facilitate the use of such platforms as viable experimental  
14 set-ups. Nevertheless, the emergence of well-defined complete structures suggests that this will likely be  
15 possible. It is plausible that upon further experimentation and mechanistic understanding of self-  
16 organization, the efficiency and variability in SEM formation can be improved in the future. It is also likely  
17 that alternative *ex utero* culture platforms, aggregation strategies, or growth conditions will yield similar or  
18 enhanced results relative to the ones reported herein with human SEMs.

19

20 Testing of whether human SEMs described here can develop further towards completing  
21 gastrulation and initiating organogenesis as achieved with mouse SEMs, may be of critical experimental  
22 importance and may offer insights into previously inaccessible windows of early human development<sup>1,2</sup>.

23

24

25

26

27

28

29

30

31

32

33

34



1 **Acknowledgments:** J.H.H lab was funded by Pascal and Ilana Mantoux; Flight Attendant Medical  
2 Research Institute (FAMRI); MBZUAI-WIS Program, ISF; Minerva, Israel Cancer Research Fund (ICRF),  
3 Kimmel Stem Cell Research Center, and a sponsored research program by Renewal Bio Ltd. F.L. lab is  
4 supported by the Ming Wai Lau Center for Reparative Medicine, Ragnar Söderbergs Stiftelse, Wallenberg  
5 Academy Fellow, Center for Innovative Medicine and Karolinska Institutet SFO Stem Cells and  
6 Regenerative Medicine. S.P. lab is supported by the Swedish Research Council, Swedish Society for  
7 Medical Research. S.P. holds the Canada Research Chair in Functional Genomics of Reproduction and  
8 Development (950-233204),

9  
10 **Author contributions:** B.O and E.W established the SEM aggregation conditions and protocols for ex  
11 utero culture, designed and conducted most of the wet lab work and contributed on manuscript elaboration.  
12 B.O established the human stem cell conditions, and inductions. E.W and V.B conducted most embryo  
13 immunostaining and confocal imaging. V.B made light sheet microscopy analysis and helped writing the  
14 manuscript. B.O. generated cell lines with assistance from S.V and optimized the final SEM protocol.  
15 A.A.C conducted some aggregation experiments and roller culture adaptation for the system,  
16 immunostaining and microscopy and sample preparation for 10X scRNA-seq experiments. M.Y.C helped  
17 on human stem cell culture expansion and optimizations. C.Z conducted the scRNAseq comparative  
18 analysis to previous human and NHP datasets, under the supervision of F.L and S.P. S.T contributed on  
19 optimization of lineage inductions. R.C generated MEF and other critical reagents for stem cell  
20 maintenance. S.A and D.L conducted immunostainings and RT-PCR. F.R, C.J, M.R assisted in  
21 immunostainings. N.L assisted on lentivirus production and flow cytometry experiments. E.A supervised  
22 flow cytometry and sorting experiments. T.S helped in bioinformatic analysis. S.V generated plasmids.  
23 A.A.C, M.K. and H.K.S performed RNA library preparation and sequencing. S.A provided input on  
24 optimizing light sheet microscopy experimentation and analysis. N.N. – conducted and supervised  
25 bioinformatics analyses. J.H.H. conceived the idea for the project, supervised data analysis and manuscript  
26 writing.

27  
28 **Declaration of interests:** J.H.H has submitted patent applications relevant to the findings reported herein  
29 and is a chief scientific adviser of Renewal Bio Ltd. that has licensed technologies described herein.

30  
31  
32  
33  
34

## 1 **Figure Legends**

2

3 **Figure 1. Optimizing human naïve PSC differentiation towards extra-embryonic lineages competent**  
4 **for early post-implantation SEM generation. a**, left, scheme of the tested induction (iGATA4, iGATA6,  
5 iCDX2, iGATA3) and media conditions for generating the three different needed extraembryonic lineages  
6 from naïve pluripotent stem cells (nPSC). Right, scheme of the early human post-implantation embryo with  
7 the epiblast (cyan), hypoblast (yellow), ExEM (grey), and trophoblast (magenta) compartments. **b**, Flow  
8 Cytometry (FACS) plots of PDGFRa-APC versus SSC for PrE/ExEM induction using iGATA4 with DOX  
9 in HENSM after 6 days (right) and the control condition of naïve cells (WT cells without iGATA4, left). **c**,  
10 from left to right, FACS plots of PDGFRa-APC for PrE/ExEM induction using iGATA4 and iGATA6 with  
11 DOX for 6 days in different media conditions as indicated (C10F4PDGF, RACL, RCL). **d**, from left to  
12 right, FACS plots of PDGFRa-APC for PrE/ExEM using WT naïve PSCs induced 6 days in different media  
13 conditions (N2B27, RCL, and RCL for 3 days followed by 3 days of N2B27). **e**, immunofluorescence  
14 images of WT nPSCs induced in RCL media for SOX17 (yellow) and BST2 (red). Two distinct cell  
15 populations emerge with mutually exclusive expression pattern (outlined); scale bar, 100  $\mu$ m. **f**, FACS plots  
16 of ENPEP against TACSTD2 for trophoctoderm (TE) lineage induction of HENSM naïve PSCs in BAP(J)  
17 regimen for 3 days. **g**, immunofluorescence images of day 6 SEM aggregates stained for OCT4 (cyan),  
18 SOX17 (yellow) and SDC1 (magenta). Aggregates made with iGATA3 in DOX for 72h in BAP(J), showed  
19 no outer surrounding trophoblasts in the obtained aggregates (left). In contrast, WT nPSCs in BAP(J)  
20 showed very high efficiency in yielding aggregates with outer layer of surrounding trophoblast (marked by  
21 SDC1 – magenta). Scale bars 100  $\mu$ m. RACL **R**PMI based medium with **C**HIR99021, **A**CTIVIN, and **L**IF;  
22 RCL, **R**PMI based medium with **C**HIR99021 and **L**IF without **A**CTIVIN; HENSM, **H**uman **E**nhanced  
23 **N**àive **S**tem cell **M**edia; BAP(J), DMEM/F12 based medium with ALK4/5/7 inhibitor **A**83-01, ERKi/MEKi  
24 **P**D0325901, and **B**MP4 substituted with **J**AK inhibitor I after 24h.

25

26 **Figure 2. Self-assembly of human Post-Implantation SEM exclusively from non-transgenic naïve**  
27 **PSCs. a**, anatomical sections taken from the Carnegie collection and schemes of the human embryo  
28 development between 7 and 14 days post-fertilization (dpf); left to right, Carnegie Stages (CS) CS5a (7-8  
29 dpf), CS5b (9-10 dpf), CS5c (11-12 dpf), and CS6a (13-14 dpf). **b**, scheme of the protocol for generating  
30 human early post-implantation SEMs. Hypoblast/ExEM (yellow/grey), epiblast (cyan), and trophoblast  
31 (magenta) lineage priming for 3 days from naïve hPSCs in HENSM media is followed by aggregation  
32 (counted as day 0) in Aggrewell 400 at the 1:1:3 nPSC: PrE/ExEM: TE ratio in N2B27. Starting from day  
33 3, SEMs are transferred to non-adherent 6-well plates on a shaker and cultured in *Ex-Utero* Culture Medium  
34 2 (EUCM2) with increasing concentrations of FBS until day 8 (see Methods). **c**, representative brightfield



1 images of SEMs growing between days 0 and 8 showing formation of the inner embryonic structures, which  
2 were defined based on the lineage-specific immunofluorescence (see **Extended Data Figure 12b**). Scale  
3 was maintained to show the growth. **d**, from left to right, immunofluorescence images of SEMs from days  
4 4, 6, and 8 of the protocol, showing OCT4 (cyan), SOX17 (yellow), CK7 (magenta), and nuclei (DAPI,  
5 white), labeling different embryonic structures (marked with arrows). **e**, quantification of the SEM  
6 derivation efficiency across three independent experimental replicates. **f**, 3D reconstruction of the day 8  
7 SEM shown in **d** (right) with segmented epiblast, (OCT4, cyan), hypoblast (SOX17, yellow), CK7  
8 (magenta) and nuclei (DAPI). Bottom, segmentation of the epiblast and hypoblast shown in 0 and 90°  
9 degrees of rotation. See also **Video S1**. Epi, epiblast; AC, amniotic cavity; Am, amnion; TE, trophoctoderm;  
10 Tb, trophoblast; PrE, primitive endoderm; Hb, hypoblast; PYS, primary yolk sac; VE, visceral endoderm;  
11 PE, parietal endoderm; SYS, secondary yolk sac; ExEM, extraembryonic mesoderm; ChC, chorionic  
12 cavity; Sk, stalk; L, lacunae. Scale bars, 50 μm.

13

14 **Figure 3. Human SEMs undergo epiblast morphogenesis and form a bilaminar disk with amnion and**  
15 **PGCs. a**, immunofluorescence images of naïve PSCs in HENSM medium, showing expression of OCT4  
16 (cyan), DNMT3L (green, top), STELLA (green, middle), but not OTX2 (red). **b**, immunofluorescence  
17 images of Day 3 SEMs in N2B27 showing expression of OCT4 (cyan) and OTX2 (red), but not DNMT3L  
18 (green, top) or STELLA (green, middle). **c**, immunofluorescence images of SEMs developing from day 4  
19 to day 8 showing epiblast (OCT4, cyan), hypoblast (SOX17 or GATA6, yellow), and trophoblast (CK7,  
20 SDC1 or GATA3, magenta). Right, zoom into the epiblast. Single- and double- asterisks mark proamniotic  
21 and amniotic cavities, respectively. **d**, quantification of epiblast growth by counting cell numbers in day 4,  
22 6, and 8 SEMs. p-values, two-sided Mann-Whitney U-test. **e**, immunofluorescence images of day 6 SEMs  
23 showing apical cell markers: phospho-Ezrin/Radixin/Moesin (ph-ERM, red; top), Podocalaxyn (PODXL,  
24 red; bottom), and F-actin (green). **f**, immunofluorescence image, showing Anterior-Posterior (A-P) axis,  
25 marked by expression of T/BRA (red) and CER1 (green) on the opposite sides of the SEM in day 8. Right,  
26 zoom into the epiblast (OCT4, cyan). **g**, immunofluorescence image, showing amnion, marked by co-  
27 expression of TFAP2A (magenta) and ISL1 (green) in SOX2-negative cells (cyan) of the day 8 SEM. Right,  
28 zoom into the epiblast region; arrows point at the amnion cells. **h**, immunofluorescence image, showing  
29 putative amnion in day 7 SEM, characterized by squamous OCT4-positive cells; OCT4 (cyan), DAPI  
30 (white). **i**, histological sections from the Carnegie collection of the human embryo at Carnegie Stage (CS)  
31 CS5c highlighting the start of amnion (Am) formation. **j**, immunofluorescence image, showing amnion in  
32 day 8 SEMs, characterized by squamous cells expressing TFAP2A (magenta), but not SOX2 (cyan); nuclei  
33 (DAPI, white). See also **Video S2**. **k**, histological sections taken from the Carnegie collection of the human  
34 embryo at Carnegie Stage (CS) CS6 highlighting amnion (Am) located dorsally to the bilaminar disk. **l**,

1 immunofluorescence images (Z slices 22 and 26, top and bottom, respectively) of day 8 SEM, showing  
2 progenitor germ cells (PGCs) with co-expression of OCT4 (cyan), SOX17 (yellow), and BLIMP1 (red).  
3 Right, zoom into the individual PGCs, marked with arrows. Inset, brightfield image, embryo perimeter is  
4 outlined. Single- and double- asterisks mark proamniotic and amniotic cavities, respectively. Scale bars, 50  
5  $\mu\text{m}$ , 25  $\mu\text{m}$  (e, right), 10  $\mu\text{m}$  (l, right).

6  
7 **Figure 4. Human SEMs recapitulate development of yolk sac lumenogenesis and extra-embryonic**  
8 **mesoderm scaffolding. a**, immunofluorescence image, showing yolk sac (YS) parietal (PE) and visceral  
9 (VE) endoderm (SOX17, yellow) in day 6 SEM. Nuclei (DAPI, blue), F-actin (white). Right, zoom into  
10 cuboidal VE and squamous PE cells. See also **Video S4. b**, quantification of cell aspect ratio (height/width)  
11 in VE (n = 14) and PE (n = 12) cells. **c**, Histological section taken from the Carnegie collection of the  
12 human embryo at Carnegie Stage 5c with a primitive yolk sac (PYS), cuboidal visceral endoderm (VE, top  
13 right), and squamous parietal endoderm (PE, bottom right). **d**, immunofluorescence images of day 6 SEMs  
14 showing epiblast (OCT4, cyan), hypoblast (SOX17, GATA6, yellow), and trophoblast (CK7, GATA3,  
15 magenta); nuclei (DAPI, white). Right, 2x zoom into the yolk sac (YS) region with extraembryonic  
16 mesoderm (ExEM). White arrows point at the VE and PE. **e**, immunofluorescence image of day 6 SEM  
17 showing formation of chorionic cavity (ChC) surrounded by ExEM (outlined) expressing GATA6 (red) and  
18 not SOX17 (yellow); nuclei (DAPI, white). Note lower expression levels of GATA6 in ExEM relative to  
19 YS cells. **f**, immunofluorescence image of day 6 SEM showing expression of BST2 in the cell membrane  
20 (red) in ExEM underneath the YS (SOX17, yellow); OCT4 (cyan), nuclei (DAPI, white). Right, zoom into  
21 the ExEM region. **g**, immunofluorescence image of day 8 SEM showing expression of VIM (red) in ExEM  
22 underneath the YS (SOX17, yellow); OCT4 (cyan), nuclei (DAPI, white). Right, zoom into the ExEM  
23 region. The boundaries between the YS, ExEM, and trophoblast (Tb) are outlined. See also **Video S5. h**,  
24 schematic of the 14 dpf human embryo showing ExEM in grey; Am, amnion; Sk, stalk; SYS, secondary  
25 yolk sac. **i**, brightfield and immunofluorescence images of day 8 SEM in different Z slices (Z 42 and 67)  
26 showing FOXF1 (green), GATA6 (red), and OCT4 (cyan). Arrows point to epiblast (Epi), ChC, ExEM,  
27 YS, Sk, and a secondary yolk sac (SYS); scale bar, 100  $\mu\text{m}$ . **j**, immunofluorescence image of day 8 SEM  
28 with a cavitated ExEM marked by BTS2 (white), and SYS; OCT4 (cyan), SOX17 (yellow). Red arrows  
29 point at the SOX17+ PYS cell remnants. See also sequential sections from the same SEM in **Extended**  
30 **Data Fig. 17. k**, histological section taken from the Carnegie collection of the human embryo at Carnegie  
31 Stage 6 showing filamentous ExEM and the secondary yolk sac (SYS). Scale bars, 50  $\mu\text{m}$ , 10  $\mu\text{m}$  (zoom:  
32 a, c, f).

33  
34

1 **Figure 5. Trophoblast compartment integration and maturation in human SEMs.** **a**, top,  
2 immunofluorescence images of day 6 SEMs showing epiblast (OCT4, cyan), hypoblast (SOX17 or GATA6,  
3 yellow), and trophoblast (GATA3, CK7 or SDC1, magenta). Bottom, single-channel images of the  
4 trophoblast, surrounding the SEMs. **b**, scheme of the 11-12 dpf human embryo showing multinucleated  
5 syncytiotrophoblast (magenta) with lacunae. **c**, left, maximum intensity projection image of day 6 SEMs  
6 showing HCGB expression in the outer cells; F-ACTIN (red). Right, immunofluorescence image of the  
7 same SEM showing intracellular lacunae (marked with asterisks) inside the outer syncytiotrophoblast cell  
8 layer; nuclei (DAPI, white). **d**, histological section and 3D reconstruction (top right) from the Carnegie  
9 collection of a human embryo at Carnegie Stage (CS) 5c, showing lacunae in the syncytiotrophoblast  
10 (asterisks). **e**, brightfield and immunofluorescence images of two different Z planes (number 3 and 11, top  
11 and bottom panels, respectively) of day 6 SEMs showing epiblast (OCT4, cyan), hypoblast (SOX17, or  
12 GATA6, yellow), and trophoblast (SDC1, magenta). Top row - Lacunae are outlined and marked with  
13 asterisks. Right, zoom into the lacunae (top). Bottom row - the outer syncytiotrophoblast layer (bottom), its  
14 thickness is marked with brackets. **f**, immunofluorescence image of day 6 SEM showing CK7 (magenta),  
15 F-ACTIN (red), and nuclei (DAPI, white). Bottom, zoom into the multinucleated syncytiotrophoblast cell;  
16 arrows point at multiple nuclei inside the single cell. Scale bars, 50  $\mu$ m, 10  $\mu$ m (e, zoom).

17

18 **Figure 6. scRNA-seq analysis validates key cell type identity comprising the human SEM.**

19 **a**, UMAP plot displaying individual human SEM derived cells. Points are colored according to their  
20 assigned cell cluster. All 13 clusters representing multiple cell types were identified based on known marker  
21 genes and overlap with gene signatures, as indicated. ExEM: Extra-embryonic Mesoderm; YS: Yolk-Sac;  
22 Hb: Hypoblast; SYS: Secondary Yolk Sac; Am: Amnion; Tb: Trophoblast. **b**, Normalized expression of  
23 key marker genes projected on SEM UMAP. Cell type cluster highlighted is indicated in red, along with  
24 the corresponding cluster number. **c**, Dot-plot illustrating the expression of key marker genes across the 13  
25 clusters. Cell types as in (A) and (B). Color shade indicates average expression. Dot size indicates the  
26 percentage of cells in the cluster which express the marker highlighted. **d**, left: POU5F1+PRDM1+SOX17+  
27 cells (n=27) can be identified in Epi clusters, with majority located in cluster 4 (n=19). Right: Normalized  
28 expression heatmap of PGC markers (SOX17, PRDM1, NANOS3, NANOG, POU5F1). 9 cells were  
29 positive for POU5F1, PRDM1, SOX17 and NANOS3, again confirming their identity as human PGCs. **e**,  
30 Left: UMAP projection of integrated human embryonic reference <sup>101</sup> consisting of 5 human embryonic data  
31 sets spanning in vitro cultured human blastocysts <sup>24,118,119</sup>, 3D- in vitro cultured human blastocysts until pre-  
32 gastrulation stages <sup>120</sup>, and a Carnegie Stage 7 (CS7) 16-19dpf human gastrula <sup>117</sup>. The color of each data  
33 point corresponds to the cell annotations retrieved from the respective publication. Right: The grey data  
34 points represent embryonic reference cells, as in the left panel. Each colored triangle represents the

1 projection position of representing neighborhood nodes from SEM cells onto the human embryonic  
2 reference UMAP space.

3  
4  
5  
6  
7  
8  
9  
10  
11  
12  
13  
14  
15  
16  
17  
18  
19  
20  
21  
22  
23  
24  
25  
26  
27  
28  
29  
30  
31  
32  
33  
34

## 1 **Extended Data Figure Legends**

2 **Extended Data Figure 1. Optimization of extra embryonic lineage induction using transient**  
3 **overexpression of GATA4 and GATA6. a**, scheme of the donor plasmid vector used for genomic  
4 integration of the DOX-inducible iGATA4 or iGATA6 overexpression in human PSCs. **b**, Representative  
5 immunofluorescence images of mono- and polyclonal iGATA4 (left) and iGATA6 (right) WIBR3 hESC  
6 (W3) clones, showing uniform expression of GATA4 (green) and GATA6 (green) only in response to DOX;  
7 nuclei (DAPI, blue). Scale bars, 50  $\mu$ m. **c**, Flow Cytometry (FACS) plots of PDGFRa-PE/Cy7 marking  
8 primitive endoderm (PrE) induction from mouse embryonic stem cells (ESC) using iGata4 with DOX for  
9 48 hours in 2i/Lif medium (right) versus the control condition (without DOX). **d**, FACS plots of PDGFRa-  
10 APC for putative PrE/ExEM induction from human naïve pluripotent stem cells (nPSCs) using iGATA6  
11 with DOX in different media (N2B27 and HENSM) as indicated. **e**, Representative FACS plot of PDGFRa-  
12 APC for putative PrE/ExEM induction from iGATA4 nPSCs in NACL media. **f**, Representative FACS  
13 plots of PDGFRa-APC for putative PrE/ExEM PrE induction of wild type (WT, non-genetically modified)  
14 nPSCs in RCL media with B27 with insulin (left) or B27 without insulin (right). **g**, Representative FACS  
15 plots of PDGFRa-APC for putative PrE/ExEM induction from human nPSCs after three days in RCL  
16 medium (conventional 2D conditions) followed by three days of RCL in aggregation setting (3D -left) or  
17 N2B27 (right). **h**, qRT-PCR gene expression (normalized by GAPDH and ACTIN) of the endodermal  
18 markers for PrE/ExEM induction in RCL medium starting from naïve (blue) vs primed (red) human PSC.  
19 Naïve human PSCs maintained in HENSM (white) were used as a reference control (set as 1). (DE) - definitive  
20 endoderm.

21  
22 **Extended Data Figure 2. Immunostaining for PrE signature in naïve PSC derived cells in RCL**  
23 **conditions. a, b**, immunofluorescence images of WT and iGATA6 naïve PCS cells with and without DOX  
24 induced in RCL media for 3 or 6 days as indicated (**a** and **b**, respectively), showing expression of the  
25 indicated PrE markers (red), including SOX17, and nuclei (DAPI, blue). Scale bars, 100  $\mu$ m.

26  
27 **Extended Data Figure 3. Optimization of PrE/ExEM induction protocol from human naïve PSCs. a**,  
28 RT-qPCR gene expression (normalized by GAPDH and ACTIN) of the endodermal marker genes, in RCL  
29 (yellow), RACL (blue), NACL (dark blue), and N2B27 (grey) media conditions versus naïve PCSs used as  
30 reference control (white). PrE-/ExEM and definitive endoderm (DE)-specific genes are separately  
31 underlined. **b**, immunofluorescence images iGATA6 nPSCs induced in RCL media for 6 days (with or  
32 without DOX), showing expression of SOX17 (yellow), BST2 (red), and GATA4 (green) (see also **Fig.**  
33 **1e**). In both set-ups, BST2-positive (ExEM) and SOX17 – positive (PrE) cell populations are mutually  
34 exclusive. Scale bars, 200  $\mu$ m. **c**, immunofluorescence images of WT WIBR3 (W3) nPSCs induced in RCL

1 media for 6 days, showing expression of GATA4 (green), FOXF1 (blue), and BST2 (white); nuclei (DAPI,  
2 white; left panel). As expected, GATA4 marks both SOX17+ PrE and BST2+ ExEM populations. Scale  
3 bars, 500  $\mu$ m. **d**, left, immunofluorescence images of iGATA6 nPSCs induced with DOX in RCL media  
4 for 3 days (top) and 6 days (bottom). **d**, Immunofluorescence images of WT nPSCs in RCL media for 6  
5 days (bottom). SOX17 (yellow), BST2 (red), nuclei (DAPI, white). Scale bars, 100  $\mu$ m. Please note that  
6 the BST2+ cells are GATA4+/FOXF1+, excluding the possibility that they represent residual pluripotent  
7 cells in the RCL induced cultures.

8

9 **Extended Data Figure 4. Testing Tb induction using transient overexpression of CDX2 in human**  
10 **naïve PSCs. a**, relative proportion of the indicated cell types among extra-embryonic cells of mouse natural  
11 embryos grown in utero or ex utero and in day 8 mouse SEMs generated from iCdx2 mouse naïve ESCs  
12 (and not embryo derived mouse TSC lines)<sup>76</sup>. Three pooled samples are presented: *in utero* natural embryos  
13 (n = 2401 cells), *ex utero* natural embryos (n = 1382), and mouse iCdx2 day 8 SEMs (n = 6249). The cell  
14 types: Chorion, Intermediate-Chorion, Chorion Progenitors, Uncommitted Ectoplacental-Cone Cells  
15 (EPC), Trophoblast Giant Cells (TGC) progenitors, parietal trophoblast giant cells (pTGC), spiral artery  
16 associated trophoblast giant cells (SpA-TGC), and junctional zone spongiotrophoblast cells (SpT-Gly)  
17 based on previously published similar analysis and annotations<sup>77</sup>. **b**, frequencies of the cell types presented  
18 in **(a)**, showing a significant reduction of TGC-progenitors and pTGCs in *ex utero* embryos (natural and  
19 SEM), compared to *in utero* embryos. Shaded area represents 95% confidence interval. This analysis  
20 confirmed that naïve PSCs derived TSC lineage following Cdx2 overexpression under optimized conditions  
21 developed in<sup>76</sup>, can contribute to both the chorionic and ectoplacental cone lineages in mouse SEMs  
22 generated exclusively from mouse naïve PSCs. **c**, scheme of the donor plasmid vector used for genomic  
23 integration of the DOX-inducible CDX2 overexpression in human PSCs. **d**, immunofluorescence images  
24 of iCDX2 cells, showing CDX2 (green) expression only in response to DOX; nuclei (DAPI, blue). Scale  
25 bars, 50  $\mu$ m. **e**, images of iCDX2 (left) and WT (right) human W3 ESCs in HENSM conditions, showing  
26 live fluorescence of tdTomato (red) after transfection with lentiviral particles carrying the fluorophore.  
27 Scale bars, 50  $\mu$ m. **f**, top, the scheme of the experiment, where naïve PSCs and Hypoblast/ExEM induced  
28 cells were aggregated with iCDX2 cells, induced by DOX for 48h in three different media, PALY (N2B27  
29 supplemented with PD0325901, A83-01, hLIF, and Y-27632)<sup>22</sup>, TSCm<sup>70</sup>, and BAP(J) (DMEM/F12 based  
30 medium with ALK4/5/7 inhibitor A83-01, FGF2 inhibitor PD0325901, and BMP4 substituted with JAK  
31 inhibitor I after 24h). **f**, bottom, immunofluorescence images showing no surrounding trophoblast in  
32 aggregates with iCDX2 cells, regardless of the media conditions; epiblast (OCT4, cyan), hypoblast  
33 (GATA4, SOX17, yellow), trophoblast (CK7, SDC1, magenta), nuclei (DAPI, blue). Scale bars (from left  
34 to right), 100  $\mu$ m, 100  $\mu$ m, 50  $\mu$ m. **g**, RT-qPCR gene expression (normalized by GAPDH and ACTIN) of



1 iCDX2 (blue) and WT (red) cells in TSCm conditions for one, three, and six days versus naïve PSCs  
2 maintained in HENSM conditions and used as a reference control (white). **h**, top, the scheme of the  
3 experiment, in which naïve PSCs and Hypoblast/ExEM induced cells were aggregated with WT or iCDX2  
4 tdTomato-labelled nPSC induced towards trophoblast (TE) in PALY media with or without DOX as  
5 indicated. **h**, bottom, brightfield and live fluorescence images of day 4 – 7 aggregates showing localization  
6 of the trophoblast. Scale bar, 200  $\mu\text{m}$ . **i**, Phase contrast microscopy images showing iCDX2 cells induced  
7 for 72h in different media (HENSM, BAP(J), TSCm) with or without DOX, showing reduced viability upon  
8 iCDX2 transgene overexpression. In all conditions, 750,000 iCDX2 cells were seeded in 10 cm Matrigel  
9 coated plates, and DOX induction was started 24h after seeding. Scale bar, 100  $\mu\text{m}$ .

10

11 **Extended Data Figure 5. Testing SEM aggregations with human conventional trophoblast stem cell**

12 **lines. a**, scheme depicting aggregation protocol of epiblast (naïve hPSCs in HENSM media) and PrE/ExEM  
13 cells with tdTomato-expressing validated human TSC line derived from human primed ESCs (termed  
14 pTSC). **b**, brightfield images and live fluorescence of tdTomato (red) in aggregates with labeled TSCs;  
15 scale bar, 200  $\mu\text{m}$ . Right, zoom into the several SEMs with tdTomato signal. Scale bar, 50  $\mu\text{m}$ . The  
16 aggregates with TSCs do not form a uniformly surrounding TB layer, but rather remain as isolated clumps.  
17 **c**, immunofluorescence images of day 8 aggregates, showing OCT4 (cyan), SDC1 (magenta), and TSCs,  
18 labelled by tdTomato; nuclei (DAPI, white). Scale bar, 50  $\mu\text{m}$ . White arrows highlight TSC isolated clumps.  
19 **d**, sequential aggregation of nPSCs (in HENSM) with tdTomato-expressing primed PSC derived TSC line  
20 on the first or second days of the aggregation protocol. **e**, brightfield images and live fluorescence of  
21 tdTomato (red) in day 5 and 8 aggregates with TSCs, added on the first (top) or second (bottom) days of  
22 aggregation; scale bar, 200  $\mu\text{m}$ . Right, zoom into the several SEMs with tdTomato signal. Scale bar, 50  
23  $\mu\text{m}$ . The aggregates with TSCs do not form a uniformly surrounding TB layer, but rather remain as isolated  
24 clumps.

25

26 **Extended Data Figure 6. Testing SEM aggregations with naïve PSC derived human trophoblast stem**

27 **cell lines. a**, immunofluorescence images validating correct expression of TSC marker genes in colonies of  
28 a WIBR3 (W3) naïve hESC derived TSC line (termed nTSC). CK7, TFAP2C, GATA3, CDX2 (all in  
29 green); DAPI (blue). Scale bar, 100  $\mu\text{m}$ . **b**, scheme for aggregation protocol of naïve pluripotent stem cells  
30 (nPSCs) in HENSM media, naïve-derived trophoblast stem cells (nTSCs), and nPSCs induced in RCL  
31 towards PrE/ExEM for 3 days. **c**, immunofluorescence images showing rare expression of CK7, GATA3,  
32 and SDC1 (red) trophoblast markers in the aggregates. nuclei (DAPI, white); Left column scale bar, 500  
33  $\mu\text{m}$ ; Right, zoom into several aggregates with CK7 expression; scale bar, 100  $\mu\text{m}$ . **d**, immunofluorescence  
34 image from (**upper left panel in c**), showing Epi (OCT4, cyan) and PrE (SOX17, yellow) with CK7 (red);

1 nuclei (DAPI, white). Zoom ins from the indicated regions are shown. Although some aggregates express  
2 lineage markers, they do not organize into embryoid-like structures and are not uniformly surrounded by  
3 the trophoblast compartment. Scale bar, 500  $\mu\text{m}$ ; bottom, 100  $\mu\text{m}$ .

4

5 **Extended Data Figure 7. Evaluating trophoblast induction using transient overexpression of GATA3**

6 **in human naïve PSCs. a**, scheme of the donor plasmid vector used for genomic integration of the DOX-

7 inducible iGATA3 overexpression transgene. **b**, immunofluorescence images of iGATA3 cells, showing

8 uniform GATA3 expression (green) only in response to DOX; nuclei (DAPI, blue). Scale bars, 100  $\mu\text{m}$ . **c**,

9 brightfield images of WT (top) and iGATA3 (bottom) cells after incubation in BAP(J) media for three days.

10 Scale bar, 200  $\mu\text{m}$ . **d**, qRT-PCR gene expression (normalized by GAPDH and ACTIN) of the trophoblast

11 markers for WT naïve pluripotent stem cells (nPSCs) in BAP(J) media (purple) and iGATA3 nPSC cells

12 induced by DOX in BAP(J) media (yellow), versus nPSCs maintained in HENSM media and used as a

13 reference control (set as 1) (white). **e**, immunofluorescence images showing different patterns of expression

14 of trophoblast marker genes in the wild type (WT) nPSCs incubated in BAP(J) media for three days (top)

15 versus iGATA3 cells, induced by DOX in BAP(J) media (bottom). GATA3 (magenta), TFAP2C (magenta),

16 GATA2, CDX2, SDC1, and HCGB (all in green), nuclei (DAPI, blue). Scale bar, 100  $\mu\text{m}$ . **f**,

17 immunofluorescence images showing uniform expression of CK7 in colonies of WT nPSCs incubated in

18 BAP(J) media for three days (top), whereas colonies of iGATA3 cells induced by DOX in BAP(J) media

19 express CK7 heterogeneously, with most of them being negative for CK7. Scale bar, 100  $\mu\text{m}$ . **g**, from left

20 to right, FACS plots of ENPEP versus TACSTD2 for trophoblast (Tb) priming using iGATA3 induction in

21 different media (AP(J) with and without DOX, BAP(J) with and without DOX), and using WT nPSC

22 priming to trophectoderm in AP(J) and BAP(J) regimens. Percentage of double positive population is

23 indicated. This result shows that transient expression of the GATA3 transgene is not required for Tb

24 differentiation and that it can be achieved with BAP(J) media using WT nPSCs as starting cells.

25

26 **Extended Data Figure 8. Enhancer accessibility of extra-embryonic lineage master regulators**

27 **GATA3, GATA4 and GATA6 in human but not mouse naïve PSCs.** ATAC-seq and RNA-seq of

28 GATA3, GATA4 and GATA6 genes in human vs. mouse, as measured in naïve PSCs and in multiple

29 differentiated cell types (as indicated). HENSM conditions were used for human naïve PSCs. Known

30 enhancers are marked in grey bars at the bottom. Putative enhancers are marked in red or green: (1) green

31 indicates potential enhancers that are already open in naïve stem cells, (2) red indicates enhancers that are

32 closed in naïve pluripotent stem cells, but open in at least one differentiated cell state. Putative enhancers

33 in the approximate regions of the genes were manually selected. Open regions that overlap with promoter

34 or exon were excluded from the analysis. RNA-seq of the indicated genes in naïve PSCs are shown. The



1 latter shows that while Gata6, Gat3 and Gata4 master regulators of extra-embryonic lineage  
2 differentiation<sup>63,127</sup> are not transcribed in mouse and human naïve PSCs, their enhancers are predominantly  
3 more accessible in human naïve PSCs, but not in mouse naïve PSCs.

4

5 **Extended Data Figure 9. Optimization of the cell numbers co-aggregated for conducive human SEM**

6 **formation exclusively from human naïve PSCs. a**, scheme of the protocol: induced PrE/ExEM cells

7 (yellow), WT naïve pluripotent stem cells (nPSCs) maintained in HENSM medium (cyan), and WT nPSC

8 induced towards trophoblast with BAP(J) medium (magenta) were aggregated on Aggrewell 400 platform

9 at different ratios in N2B27 and grown as indicated in the scheme until day 6. **b**, left, brightfield images of

10 day 6 SEMs, aggregated from total 60 cells at 1:1:3 (nPSC: PrE/ExEM: TE) cell ratio, showing mostly

11 small and fragmented aggregates. Right, brightfield images of day 6 SEMs, aggregated from total 120 cells

12 at 1:1:3 (nPSC: PrE/ExEM: TE) cell ratio, showing lower fragmentation tendency and more frequent

13 formation of bigger aggregates (this condition was chosen for SEM generation). Scale bar, 1000  $\mu$ m; zoom,

14 125  $\mu$ m. **c**, immunofluorescence images of day 6 SEMs showing epiblast (OCT4, cyan), hypoblast (SOX17,

15 yellow), and trophoblast (SDC1, magenta); nuclei (DAPI, white). Left, Day 6 SEMs aggregated from total

16 132 cells at 4:2:7 (nPSC: PrE/ExEM :TE) cell ratio, or , right, from total 160 cells at 2:1:5 (nPSC:

17 PrE/ExEM :TE) cell ratio showing inadequate organization of SEMs, when compared to optimized

18 conditions (120 cells at 1:1:3 nPSC: PrE/ExEM: TE) as shown in **Extended Data Figure 12c**. Scale bars,

19 100  $\mu$ m. **d**, left, scheme of the experiment testing the capacity of cells, differentiated from human WIBR3

20 primed PSCs, to form equivalent SEMs to those obtained from isogenic naïve PSCs expanded in HENSM

21 conditions. Right, immunofluorescence images of day 6 SEMs showing OCT4 (cyan), SOX17 (yellow),

22 CK7 (magenta), and nuclei (DAPI, white). Scale bar, 200  $\mu$ m. The resulting aggregates when starting with

23 isogenic primed PSCs, did not present organization and maturation of the key embryonic and extra-

24 embryonic compartments as seen when starting with naïve PSCs (please compare to **Fig. 2**).

25

26 **Extended Data Figure 10. Optimization of the aggregation conditions for human SEM generation**

27 **from naïve PSCs. a**, scheme of the protocol: PrE/ExEM induced cells in RCL medium (yellow), WT naïve

28 pluripotent stem cells (nPSCs) maintained in HENSM medium (cyan), and iGATA3 trophoblast cells

29 induced with DOX in BAP(J) medium (magenta) were aggregated in different media in Aggrewell 400

30 plate at 1:1:3 (nPSC: PrE/ExEM: TE) ratio and cultured until day 6. **b**, from bottom to top, representative

31 brightfield images of day 2 and 4 SEM, aggregated in DMEM-F12:Neurobasal (1:1) supplemented with

32 20% FBS or N2B27, CMRL 1066 base medium supplemented with 20% FBS or N2B27, CMRL

33 supplemented with N2B27 and extra-added 3 mg/ml D-Glucose, and DMEM F12: Neurobasal (3:1).

34 Although addition of FBS is beneficial for SEM growth, FBS impairs aggregation by day 4, and the best

1 aggregation efficiency was consistently observed in DMEM-F12:neurobasal supplemented with N2B27  
2 without FBS. **c**, representative brightfield images showing of SEM morphology at day 6 after aggregation  
3 in DMEM-F12:Neurobasal and CMRL supplemented with 20% FBS. Addition of FBS impaired formation  
4 of the aggregates while N2B27 conditions allowed better human PSC derived aggregate growth. Scale bars,  
5 200  $\mu\text{m}$ .

6  
7 **Extended Data Figure 11. Optimization of human SEM culture conditions.** **a**, brightfield images of day  
8 2 SEM aggregates inside the Aggrewell 400 plate; addition of BSA to the aggregation medium prevents  
9 attachment of the aggregates to the plate edges (white arrows). Scale bar, 400  $\mu\text{m}$ . Optimal BSA  
10 concentration chosen for further experimentation highlighted by a green box. **b**, growth of SEMs in 6-well  
11 non-adherent plates without shaking leads to their attachment to the plate and disruption of morphology.  
12 Scale bar, 200  $\mu\text{m}$ . **c**, scheme of the experiment in which volume of the culture media on the non-adherent  
13 6-well dish, using orbital shaking (day 4-8), was optimized. **d**, brightfield images of multiple SEMs showing  
14 that the rate of their clumping with each other is dependent on the media volume (1 – 6 ml). The optimal  
15 suspension condition is outlined in green (3ml). Scale bar, 200  $\mu\text{m}$ . **e**, top, the scheme of roller culture test,  
16 where aggregates were generated as described (see Methods), cultured until day 6 on a shaker, followed by  
17 roller culture in EUCM2 50% FBS 20% O<sub>2</sub> 5% CO<sub>2</sub>. Bottom, immunofluorescence images of day 7 SEMs  
18 in this regimen, showing Epi (OCT4, cyan), hypoblast (SOX17, yellow), and trophoblast (CK7, magenta);  
19 nuclei (DAPI, white), brightfield (BF); scale bar, 200  $\mu\text{m}$ . Right, example of the SEM in which epiblast,  
20 hypoblast, and trophoblast are adequately compartmentalized; scale bar, 50  $\mu\text{m}$ .

21  
22 **Extended Data Figure 12. Characterization of epiblast, hypoblast, and trophoblast lineages in SEMs.**  
23 **a**, from left to right, representative merged brightfield (BF) and immunofluorescence images of day 3 SEMs  
24 showing three lineages, epiblast (OCT4, cyan), hypoblast (SOX17, yellow), and trophoblast (SCD1,  
25 magenta) merged with a nuclei channel (DAPI, white). **b**, representative merged brightfield and  
26 immunofluorescence images of multiple day 6 SEMs, showing epiblast (OCT4, cyan), hypoblast (SOX17,  
27 yellow), and trophoblast (CK7, magenta) merged with a nuclei channel (DAPI, white). **c**,  
28 immunofluorescence images of day 6 SEMs with segregated Epi (OCT4, cyan) and hypoblast (SOX17,  
29 yellow), and surrounded by trophoblast (CK7, magenta, outlined). Left panel shows a wide field image to  
30 identify adequate structures (dotted square). Right panel zooms into the structure of interest **d**,  
31 immunofluorescence images of common examples of mis-developed day 6 SEMs with no trophoblast (1),  
32 or no epiblast and hypoblast (2), or no epiblast (3). Epiblast (OCT4, cyan), hypoblast (SOX17, yellow), and  
33 trophoblast (SDC1, magenta); nuclei (DAPI, white). Scale bars, 50  $\mu\text{m}$ , 200  $\mu\text{m}$  (c right, d right).

34

1 **Extended Data Figure 13. Human and mouse SEMs bypass blastocyst-like stage.** a, scheme showing  
2 the distinction between human SEM (top) and human blastoid (bottom) aggregation protocols: as opposed  
3 to blastoids, SEMs do not form a blastocoel cavity. Epiblast (cyan), hypoblast (yellow), trophoblast  
4 (magenta). **b**, representative brightfield image of a blastoid with blastocoel cavity (BC). Scale bar, 100  $\mu\text{m}$ .  
5 **c**, representative examples of brightfield images of day 3 and day 4 SEMs showing no blastocoel cavity.  
6 Scale bar, 200  $\mu\text{m}$ . **d**, brightfield images of day 4 human blastoids with a BC cavity. Scale bar, 200  $\mu\text{m}$ . **e**-  
7 **f**, enlarged brightfield (BF) images of the SEMs showing no blastocoel cavity at day 3 or day 4 human  
8 SEMs (**f**). Scale bar, 100  $\mu\text{m}$ ; zoom in, 50  $\mu\text{m}$ . **g-h**, brightfield and immunofluorescence images of day 3  
9 (**g**) and day 4 (**h**) human SEMs showing developmental progression of epiblast (OCT4, cyan), hypoblast  
10 (SOX17, yellow), and trophoblast (CK7, magenta); nuclei (DAPI, white). Scale bars, 50  $\mu\text{m}$  **i**, scheme  
11 showing mouse SEM (also known as sEmbryo) aggregation with murine stem cells as described in <sup>27</sup>. **j**,  
12 immunofluorescence images showing epiblast (OCT4, magenta), hypoblast (SOX17, red), and  
13 trophectoderm (CDX2, green); Like human SEMs, mouse SEMs (sEmbryo models) do not form a BC.  
14 Notably mouse SEMs are predominantly surrounded by the PrE, rather than TE by Day 2 of the protocol.  
15 Scale bars, 50  $\mu\text{m}$ ; zoom in, 20  $\mu\text{m}$ .

16  
17 **Extended Data Figure 14. 3D structure of a human SEM at day 8.** **a**, individual Z-planes of the 3D  
18 immunofluorescence image of day 8 human SEM. Epiblast (OCT4, cyan), hypoblast (SOX17, yellow), and  
19 trophoblast (CK7, magenta); nuclei (DAPI, white). AC, amniotic cavity; Am, amnion; ExEM,  
20 extraembryonic mesoderm; SYS, secondary yolk sac; ChC, chorionic cavity; STB, syncytiotrophoblast. Z-  
21 step, 20  $\mu\text{m}$ ; scale bar, 50  $\mu\text{m}$ . See also **Video S1**.

22  
23 **Extended Data Figure 15. Characterization of the epiblast in human SEM.** **a**, immunofluorescence  
24 image of day 6 SEM showing aPKC (green), OCT4 (cyan), F-ACTIN (red), nuclei (DAPI, white). Scale  
25 bars, 50  $\mu\text{m}$ , 12.5  $\mu\text{m}$  (zoom in, right). **b**, left, immunofluorescence image of day 6 SEM showing OCT4  
26 (cyan), F-ACTIN (red), and pHERM (green); alignment of epi cells in a single 2D plane is marked with  
27 dashed lines; asterisk, pro-amniotic cavity. Scale bar, 25  $\mu\text{m}$ . **b**, right, the angle between the epiblast cell  
28 axis and the pro-amniotic cavity was quantified; the plot shows the radial histogram of the angle values.  
29 The latter shows predominant alignment of epi cells towards the center of the emerging cavity. **c**,  
30 immunofluorescence image of day 6 SEM showing CER1 (green) localization inside the intracellular  
31 vesicles; OCT4 (cyan), nuclei (DAPI, white). Right, zoom into hypoblast, arrows mark apical side of the  
32 visceral endoderm cells with CER1 vesicles. Scale bar, 50  $\mu\text{m}$ , 12.5  $\mu\text{m}$  (4x zoom in, right). **d**,  
33 immunofluorescence image of day 6 SEM showing T/Bra expression (red); OCT4 (cyan), nuclei (DAPI,  
34 white). Right, zoom into the posterior epiblast, arrows mark individual T/Bra-positive cells. Scale bar, 50

1  $\mu\text{m}$ , 12.5  $\mu\text{m}$  (4x zoom in, right). **e**, immunofluorescence image of day 6 SEM showing F-ACTIN (white)  
2 and nuclei (DAPI, blue). Right, zoom into epiblast with squamous cells (sEpi) in the top and  
3 cylindrical/columnar cells (cEpi) in the bottom parts of the epiblast. Scale bar, 50  $\mu\text{m}$ ; zoom in, 25  $\mu\text{m}$ . **f**,  
4 immunofluorescence image of day 6 SEM showing F-ACTIN (white) and OCT4 (cyan). Right, zoom into  
5 epiblast with squamous cells in the top and cylindrical cells in the bottom parts of the epiblast. Scale bar,  
6 50  $\mu\text{m}$ ; zoom in, 25  $\mu\text{m}$ . **g**, brightfield and immunofluorescence images of day 8 SEM showing NANOG  
7 (cyan), SOX17 (yellow), and nuclei (DAPI, white). Right, zoom onto PGCs in day 8 human SEMs, co-  
8 expressing NANOG and SOX17 (cells marked with arrows). Scale bars, 50  $\mu\text{m}$ .

9

10 **Extended Data Figure 16. Characterization of hypoblast and extraembryonic mesoderm in human**  
11 **SEMs. a**, immunofluorescence image of day 6 SEM showing apical polarity of the visceral and parietal  
12 hypoblast (SOX17, yellow); aPKC (heat gradient), F-ACTIN (white). Scale bar, 50  $\mu\text{m}$ ; zoom in, 10  $\mu\text{m}$ .  
13 See also **Video S3. b**, immunofluorescence image of day 6 SEM showing mesenchymal-like cells  
14 underneath the yolk sac; OCT4 (cyan), F-ACTIN (red), and nuclei (DAPI, white). Right, zoom into the  
15 region underneath the yolk sac, shown in different Z-planes (number 50, 60, and 70). Arrows point at the  
16 cells between yolk sac and the trophoblast compartments. Scale bar, 50  $\mu\text{m}$ ; zoom in, 25  $\mu\text{m}$ . See also  
17 **Video S2. c**, heatmap of GATA6 and SOX17 gene expression across extraembryonic tissues in marmoset,  
18 corresponding to the Carnegie stages (CS) 5-7), extracted from previously published study related gene  
19 expression dataset <sup>90</sup>. Am, amnion; Tb, trophoblast; VE, visceral endoderm; SYS, secondary yolk sac;  
20 ExEM, extraembryonic mesoderm. **d**, immunofluorescence image of day 6 SEM showing OCT4 (cyan),  
21 GATA4 (red), SOX17 (yellow), and nuclei (DAPI). Right, zoom on ExEM cells expressing GATA4, but  
22 not SOX17. YS, yolk sac. Scale bar, 50  $\mu\text{m}$ ; zoom in, 10  $\mu\text{m}$ . **e**, immunofluorescence images of day 6 SEMs  
23 showing chorionic cavity surrounded by ExEM (outlined), negative for SOX17 (yellow), but expressing  
24 BST2 (top, red) and GATA6 (bottom, red); OCT4 (cyan), nuclei (DAPI, white). Scale bar, 50  $\mu\text{m}$ . **f**, left,  
25 immunofluorescence image of Z slice from day 8 SEM and the zoom into the ExEM region showing VIM  
26 (red) expression and nuclei (DAPI, white). Right, merged brightfield and maximum intensity projection  
27 showing VIM (red) expression. Scale bar, 50  $\mu\text{m}$ ; zoom in, 10  $\mu\text{m}$ .

28

29 **Extended Data Figure 17. 3D structure highlighting the ExEM in human SEM at day 8. a**, individual  
30 Z-planes of the 3D immunofluorescence image of day 8 human SEM showing OCT4 (cyan), SOX17  
31 (yellow), and BST2 (white). Epi, epiblast; YS, yolk sac; ExEM, extraembryonic mesoderm; SYS,  
32 secondary yolk sac; Z-step, 20  $\mu\text{m}$ ; scale bar, 50  $\mu\text{m}$ .

33

34 **Extended Data Figure 18. Characterization of the trophoblast compartment in human SEM. a**,

1 brightfield image overlaid with the immunofluorescence of day 8 SEM showing the outer trophoblast  
2 (CK7, magenta) surrounding the entire SEM. Right, zoom into the multinucleated trophoblast layer. Scale  
3 bars, 50  $\mu$ m. **b**, the maximum intensity projection (Maxi. Proj.) of the immunofluorescence image of day 8  
4 SEM showing trophoblast (GATA3, magenta) and nuclei, (DAPI, white). Scale bar, 50  $\mu$ m. **c**,  
5 quantification of the percentage SEMs surrounded by trophoblast lineage (generated from WT naïve PSCs  
6 following 3 day BAP(J) protocol), as judged by the expression of SDC1, CK7, and GATA3 of day 6, across  
7 two independent experimental replicates. The total number of SEMs used for quantification are: SD1  
8 (n1=525 and n2=769); CK7 (n1=299 and n2=466) and GATA3 (n1=150 and n2=337). **d**, representative  
9 immunofluorescence images of multiple day 6 SEMs showing epiblast (OCT4, cyan), hypoblast (SOX17  
10 and GATA6, yellow), and trophoblast (SDC1 and GATA3, magenta) surrounding the SEMs; nuclei (DAPI,  
11 white), that were used for calculation presented in (c). Scale bar, 200  $\mu$ m. **e**, immunofluorescence image of  
12 day 6 SEM showing HCGB (green) and CK7 (magenta) staining. HCGB positive syncytiotrophoblast cells  
13 (right, zoom) are highlighted. nuclei (DAPI, white), F-actin (white, right zoom). Arrows point at the outer  
14 syncytiotrophoblast cell surface. Scale bars, 50  $\mu$ m. **f**, immunofluorescence image of a human SEM  
15 showing multinucleated HCGB-positive syncytiotrophoblast; HCGB (green), F-ACTIN (red), nuclei  
16 (DAPI, white). Arrows point at multiple nuclei inside the same single cell as validated following F-actin  
17 staining. Scale bars, 50  $\mu$ m. **g**, pregnancy test run on spent medium of the day 8 SEMs (Day 8- right)  
18 compared to unspent medium as a negative control (CTR-left) which shows the secretion of HCGB from  
19 the syncytiotrophoblast of day7-8 human SEM to the culture medium.

20

### 21 **Extended Data Figure 19. Human SEM UMAP quality assessment of scRNA-seq experiment.**

22 **a**, Violin plots indicating the number of genes, the unique molecular identifiers (UMIs), and the percentage  
23 of mitochondrial reads obtained per sample prior to filtering. **b**, Violin plots indicating the number of genes  
24 and the unique molecular identifiers (UMIs) obtained per cluster, after filtering cells with less than 1000  
25 identified genes. **c**, UMAP plot displaying individual cells of the different SEM samples as indicated. Left:  
26 Colors indicate different samples. Right: Colors indicate the 13 identified clusters as indicated in **Fig. 6a**.  
27 The number of single cells in each sample is indicated. **d**, UMAP projection of the assembled human  
28 embryonic reference dataset with color indicating data source (related to **Fig. 6e**). **e**, Highlights the projected  
29 SEMs cells on the embryonic reference UMAP space stratified by the corresponding raw Seurat clusters.  
30 The grey data points represent embryonic reference cells or unselected neighborhood nodes, while each red  
31 triangle corresponds to the projection of representative neighborhood nodes from each SEM raw cluster  
32 onto the UMAP space (related to **Fig. 6e**).

33

### 34 **Extended Data Figure 20. Identification and validation of specific cell sub-types in human SEMs.**

1 **a**, UMAP of the four annotated epiblast clusters (1,4,7 & 11) alongside normalized expression of key  
2 marker genes. From the four Epi clusters we subclassified 2 of them. The first we termed Posterior epiblast  
3 cluster (#4) was marked by upregulation of TBXT (Brachyury), MIXL1, EOMES, MESP1 and WNT8a  
4 which are markers of EMT. The second we termed as “committed epiblast” cluster (#7) and was marked  
5 by ZIC2, ZEB2, VIM lineage commitment marker expression and absence of NANOG while maintaining  
6 OCT4 and SOX2 expression. **b**, Normalized expression of key trophoblast marker genes projected on SEM  
7 UMAP. Trophoblast (Tb) cluster (number 12) is highlighted in red. **c**, Normalized expression of key amnion  
8 marker genes projected on human SEM related UMAP. Amnion cluster (number 10) is highlighted in red.  
9 **d**, Expression of BMP4 and/or FURIN in Amnion (Am) and Trophoblast (Tb) clusters.

10

11 **Extended Data Figure 21. Identification of Primary and Secondary Yolk-sac, and Extra-Embryonic**  
12 **Mesoderm lineages.**

13 **a**, Normalized expression of key Yolk-Sac (YS) marker genes projected on SEM UMAP. GATA4, GATA6,  
14 PDGFRA & APOA1 are expressed both in primary and secondary yolk-sac. TTR, APOB & GSTA1 are  
15 expressed more specifically in the secondary Yolk-sac consistent with findings in marmoset<sup>90</sup>. STC1,  
16 LHX1 are absent in secondary yolk-sac cluster, but not in primary yolk-sac consistent with findings in  
17 marmoset<sup>90</sup>. The co-expression of DKK1 and LHX1 detected via scRNA-seq alongside CER1 expression  
18 among some of the cluster 9 SOX17+ YS cells (arrows) marks AVE cells. **b**, Normalized expression of  
19 key extra-embryonic mesodermal genes projected on SEM UMAP. Cells in all four ExEM clusters (0, 2, 6  
20 and 8) express general mesodermal genes such as HAND1, LEF1 and BMP4, while only cells in clusters 0  
21 and 6 express typical extra cellular matrix related genes such as collagen genes and POSTN. **c**, differentially  
22 expressed genes between extra-embryonic mesoderm (ExEM) clusters 2 and 8 vs. (ExEM clusters 0 and 6.  
23 Most significant differentially expressed genes (adjusted p-value < 0.05 &  $\text{asb}(\log_2\text{Fold-change}) > 1$ ) are  
24 marked in red. Clusters 2 and 8, termed Early ExEM cells, expressed much lower level of extra cellular  
25 matrix related genes and remodeling enzymes, indicative of their putative relatively less mature cellular  
26 state.

27

28

29

30

31

32

33

34

35



1 **Supplementary Spreadsheet Legends**

2

3 **Supplementary Spreadsheet 1. Summary of the microscopy parameters used for imaging in**

4 **this study.** The spreadsheet provides information of the type of the microscope, used detection

5 objectives, laser lines, and the voxel size for acquisition of the images published herein.

6

7 **Supplementary Spreadsheet 2 - PCR primers used in this study.**

8 Primer names, DNA sequences from 5' to 3' end, and the cited reference (when relevant).

9

10 **Supplementary Spreadsheet 3. Human SEM scRNA-seq analysis related gene expression**

11 **list.**

12 Top markers (average  $\log_2(\text{Fold-change}) > 0.25$ ) of each of the 13 cell clusters in human SEMs,

13 as identified by Seurat package.

14

15

16

17

18

19

20

21

22

23

24

25

26

27

28

29

## 1 **Supplementary Video Legends**

2

### 3 **Video S1. 3D reconstruction of the human SEM at day 8.**

4 The video shows 3D rendering of the embryonic and extraembryonic tissue structures comprising day 8  
5 human SEM. Immunofluorescence for epiblast (OCT4, cyan), yolk sac (SOX17, yellow), trophoblast (CK7,  
6 magenta), and nuclei (DAPI, white). 0 – 8 sec, 3D view of the SEM shape and the outer trophoblast with  
7 enlarged multinuclear cells (also seen on the slices from 22 sec). 8 – 22 sec and 39 – 42 sec, 3D segmentation  
8 of the epiblast (cyan) and hypoblast (yellow) is shown with the DAPI immunofluorescence signal on the  
9 background. 22 sec – 38 sec, slicing through the 3D volume showing the inner structure of the SEM with  
10 bilaminar disk with amnion, connected to the outer trophoblast, the yolk sac with the cavity, and the  
11 surrounding connective tissues with extensive intercellular space. Immunofluorescence signal and tissue  
12 segmentation are outlined. The image was acquired with Zeiss Z7 light-sheet microscope (see Methods)  
13 and processed with Imaris v10.0.0.

14

### 15 **Video S2. 3D reconstruction of the human SEM at day 6 demonstrating pro-amniotic cavity** 16 **formation within the epiblast.**

17 3D reconstruction of the human SEM at day 6 shows 3D shape of the day 6 SEM (0 – 12 sec) and early  
18 formation of the proamniotic cavity in the center of the epiblast (12 – 18 sec). Immunofluorescence for  
19 OCT4 (epiblast, cyan), F-actin (red), and nuclei (DAPI, white). The image was acquired with Zeiss LSM  
20 800 microscope (see Methods) and processed with Imaris v10.0.0.

21

### 22 **Video S3. 3D reconstruction of the human SEM at day 8 shows embryonic disk and amnion** 23 **formation.**

24 3D reconstruction of the human SEM at the day 8, showing embryonic disk (SOX2, cyan) and amnion  
25 (TFAP2C, magenta). The segmentation of epiblast (cyan) and amnion (pink) is denoted as the semi-  
26 transparent outline together with the immunofluorescence signal. 17 – 21 sec, human SEM epiblast has a  
27 disk shape. The image was acquired with Zeiss Z7 light-sheet microscope (see Methods) and processed  
28 with Imaris v10.0.0.

29

### 30 **Video S4. 3D reconstruction of the human SEM at day 6 shows yolk sac morphology.**

31 3D reconstruction of the human day 6 SEM showing yolk sac development (marked by SOX17, yellow). 5  
32 – 18 sec, zoom into the visceral and parietal yolk sac cells having columnar and squamous cell shape,  
33 respectively, and apical cell polarity (aPKC, green). F-actin (red), nuclei (DAPI, white). The image was  
34 acquired with Zeiss LSM 700 microscope (see Methods) and processed with Imaris v10.0.0.



1  
2  
3  
4  
5  
6  
7  
8  
9  
10  
11  
12  
13  
14  
15  
16  
17  
18  
19  
20  
21  
22  
23  
24  
25  
26  
27  
28  
29  
30  
31  
32  
33  
34

**Video S5. 3D reconstruction of the human SEM at day 8 shows extraembryonic mesoderm cells integration underneath the yolk sac.**

3D reconstruction of the human SEM at the day 8 showing extraembryonic mesoderm cells located underneath the yolk sac (yellow) and marked by expression of VIM (red). OCT4 (epiblast, cyan), nuclei (DAPI, grey). The image was acquired with Zeiss LSM 700 microscope (see Methods) and processed with Imaris v10.0.0.

**Video S6. 3D reconstruction of human SEM at day 8 shows development of the syncytial trophoblast and lacunae formation.**

3D reconstruction of the human SEM at the day 8 showing development of the syncytial trophoblast, expressing both SDC1 (magenta) and HCGB (green) with multiple lacunae. F-actin (red), nuclei (DAPI, grey). 11 – 19 sec, slicing through the 3D volume showing inner structure of the multiple trophoblast lacunae. The image was acquired with Zeiss LSM 700 microscope (see Methods) and processed with Imaris v10.0.0.

## 1 **Methods**

### 3 **Ethics**

4 All experiments reported herein involving human PSCs were conducted following obtaining Weizmann  
5 Institute IRB approval (1868-2) to generate human Stem cell-derived Embryo Models (termed “SEMs” or  
6 “Stembroids”) from WIBR1, WIBR2 and WIBR3 human ESC lines <sup>128</sup> and from iPSC lines following  
7 obtaining donor informed consent to make genetically unmodified iPS lines from donated blood (Weizmann  
8 Institute IRB approval – 1871-2). All the experiments reported herein follow the latest ISSCR guidelines  
9 released in 2021<sup>126</sup>. This study does not involve derivation of new human ESC lines, does not use any  
10 newly obtained samples from fetal abortions, and does not use any newly donated human blastocysts.  
11 Further, this study does not involve in utero transfer of any human SEMs into any other species, consistent  
12 with ISSCR guidelines and Israeli legislation. Finally, all the human SEMs described herein do not  
13 correspond to developmental stages beyond 14 dpf.

### 15 **Data reporting**

16 No statistical methods were used to predetermine sample size. Samples were randomly allocated when  
17 placed in the different growth conditions. Other experiments were not randomized. The investigators were  
18 not blinded to allocation during experiments and outcome assessment since there was no relevant scientific  
19 reason to do so.

### 21 **Stem cell lines**

22 The following already established human ESC lines were used: WIBR3 (WT female), WIBR2 (WT  
23 female) and WIBR1 (WT male) human ES lines <sup>128</sup>. Genetically unmodified JH33 and JH22 human  
24 induced pluripotent stem cell (iPSC) lines made from a healthy adult Caucasian/Middle Eastern male were  
25 also used to generate human SEMs. Previously established mouse Tet-ON iGata4 KH2-WT ESC line was  
26 used for comparing induction efficiency of PDGFRa<sup>+</sup> cells <sup>27</sup>. All cell lines were routinely checked for  
27 Mycoplasma contaminations every month (Lonza–MycoAlert), and all samples analyzed in this study were  
28 not contaminated.

### 30 **Human naïve ESC in vitro culture conditions**

31 Golden stocks of human ESCs were cultured on feeder layer of irradiated mouse embryonic  
32 fibroblast (MEFs) and maintained in conventional human FGF/KSR primed conditions. FGF/KSR  
33 conditions on MEF substrate: DMEM-F12 (Invitrogen 10829) supplemented with 20% Knockout Serum  
34 Replacement (Invitrogen 10828-028), 1mM GlutaMAX (Gibco 35050061), 1% nonessential amino acids

1 (BI 01-340-1B), 1% Sodium-pyruvate (BI 03-042-1B), 1% Penicillin-Streptomycin (BI 03-031-1B) and 8  
2 ng/mL bFGF (Peprotech 100-18B-1MG).

3  
4 To reprogram primed PSCs to a naïve state, human PSCs were maintained and expanded as in  
5 Bayerl et al<sup>35</sup>, in serum-free HENSM on plates coated with 1% Matrigel (corning 356231) or MEF/gelatin-  
6 coated plates. At least three passages in HENSM conditions were applied before cells were used for  
7 experiments. Human naïve ESC lines were used for up to 10 passages in HENSM conditions. For  
8 maintenance of ESCs in naïve HENSM conditions, cells were passaged every 3-5 days using TrypLE (Gibco  
9 12604054). Naïve and primed hPSCs were expanded and induced into different lineages in a 5% CO<sub>2</sub>  
10 incubator at 5% O<sub>2</sub> at 37C.

11  
12 **Generation of iGATA4, iGATA6, iCDX2 and iGATA3 human ESCs clones**

13 To generate Tet-ON inducible lines, we employed a PiggyBac plasmid expressing cDNA insert adba  
14 transposase vector of choice under the control of a doxycycline-inducible promotor (a kind gift from Volker  
15 Busskamp, Addgene plasmid #104454). The donor vector carries M2Rtta and a site for cDNA insert of  
16 transcription factor of interest. We used this vector to generate 4 different DOX inducible lines in WIBR3  
17 WT human female ESCs: human iCDX2 or human iGATA3 (to promote human PSC differentiation  
18 towards trophoctoderm) and human iGATA4 or human iGATA6 (to promote human primitive endoderm/  
19 extra embryonic mesoderm priming from human PSCs). Puromycin selection was applied for  
20 approximately 6-8 days. Resistant clones were picked and cultured for downstream characterization.  
21 Insertion was validated by immunostaining after DOX (2µg/ml) induction of the gene of interest. Transgene  
22 expression was verified to be specifically detected only after DOX addition in the corresponding lines.  
23 Detailed generation, characterization and validation of these lines can be found on (Extended Data Figure  
24 1, 3, 7). Generation of fluorescent labeled WIBR3 iCDX2 line was made after transduction with lentivirus  
25 constitutively expressing tdTomato protein. For lentivirus generation, HEK293T cells were plated on 10  
26 cm dishes filled with 10 ml DMEM 10% FBS and Pen/Strep, at a density of 5.5 million cells per plate. On  
27 the next day, cells were transfected with Second-generation lentiviral vectors (Addgene 8455 and 8455),  
28 using X-tremeGENE 9 transfection reagent, along with 16 µg of the target plasmid for the transduced  
29 fluorescent protein (tdTomato). The supernatant containing the virus was collected 48hr following  
30 transfection, filtered using 0.45µm filter and concentrated by ultracentrifugation. Human PSCs were plated  
31 in mTESR medium on Matrigel coated 6-well plates at low density, next day they were transduced with  
32 lentivirus in the presence of protamine sulfate (10 µg/ml) for 6 hours, afterwards medium was exchanged.  
33 After 2 days, the infected human ESCs were expanded for 1 passage and the positive population was sorted  
34 using FACS and further expanded for experimentation.

1

## 2 **Derivation of a stable human TSC line from human ESCs**

3 TSC lines were produced from Naïve (HENSM) (nTSC) and primed conditions (pTSC) according  
4 to Okae et al and Viukov et al, respectively <sup>70,71</sup>. Briefly, human naïve WIBR3 ESCs were expanded at  
5 least 3 passages in naïve or primed conditions and then transferred into TSC media (TSCm) on 1% Matrigel  
6 (corning 356231) -coated plates. After 3 passages, stable TSC lines could be established and could be  
7 passaged 70 times <sup>129,130</sup>. Cells were expanded in a 5% CO<sub>2</sub> incubator at 5% O<sub>2</sub>. For maintenance, human  
8 TSC were passaged with TrypLE (Gibco 12604054) when reached 70%-80% confluency. Immunostaining  
9 was performed to confirm human TSC identity: human TSC cells were negative for CDX2, and positive  
10 for Cytokeratin7 (CK7) GATA3 and TFAP2C, consistent with previous reports. Only confirmed lines were  
11 used for SEM experiments. Human TSC media (TSCm) used herein was previously described in <sup>70</sup> with  
12 slight modifications: 470 ml DMEM/F12 (Invitrogen 21331), 5 ml Commercial N2 supplement (Invitrogen  
13 17502048), 10 ml B27 supplement (Invitrogen 17504-044), 5 mL Sodium Pyruvate (Biological Industries  
14 03-042-1B), 5 mL Penicillin/Streptomycin (Biological Industries 03-033-1B) 5ml (Biological Industries  
15 03-033-1B), 5 mL GlutaMAX (Invitrogen 35050061), 5 mL NEAA (Biological Industries 01-340-1B), 50  
16 µg/ml L-ascorbic acid 2-phosphate (Sigma A8960), 50ng/ml Human EGF (Peprotech AF-100-15), 0.75- 1  
17 µM TGFRI A83-01 (Axon 1421), 2 µM GSK3i CHIR99021 (Axon Medchem 1386), and 5 µM ROCKi  
18 Y27632 (Axon 1683).

19

## 20 **Derivation of human trophectoderm (TE) from human naïve PSCs for SEM generation**

21 Human TE cells were obtained from human naïve PSCs expanded in human HENSM conditions  
22 for at least 3 passages, 24 hours before the induced cells were plated in HENSM on 1% Matrigel (corning  
23 356231) -coated plates supplemented with 10 µM ROCKi Y27632 (Axon 1683), next day the protocol was  
24 started. The 3-day protocol for human TE induction was previously described and is adapted from Io et al<sup>36</sup>  
25 as follows: BAP(J) media was used for 72 hours. This medium consisted on 2 µM TGFRI A83-01 and 2  
26 µM MEKi/ERKi PD0325901 base, which was complemented the first 24h with 10ng/ml Human  
27 recombinant BMP4 (Peprotech) and then substituted with for 1µM JAK inhibitor I (Calbiochem 420099)  
28 on day 2 and 3. The base medium consisted on: 470 ml of 1:1 mix of Neurobasal (Invitrogen 21103-049)  
29 and DMEM/F12 (Invitrogen 21331), 5 ml penicillin-streptomycin (Biological Industries 03-033-1B), 5 ml  
30 GlutaMAX (Invitrogen 35050061), 5 ml NEAA (Biological Industries 01-340-1B), 5 ml Sodium Pyruvate  
31 (Biological Industries 03-042-1B), 10 ml B27 supplement (Gibco 17504-044), 5 ml N2 supplement  
32 (Invitrogen 17502048), 2 µM TGFRI A83-01 (Axon Medchem A83-01), 2 µM MEKi/ERKi PD0325901  
33 (Axon Medchem 1408). WT human naïve PSCs or iCDX2/iGATA3 cell lines were tested for human TE

1 induction in the presence or absence of DOX as indicated. All the process was incubated in a 37C incubator  
2 with 5% O<sub>2</sub> and 5% CO<sub>2</sub>.

### 3 4 **Primitive Endoderm (PrE) and Extra-Embryonic Mesoderm (ExEM) induction from human naïve** 5 **PSCs**

6 Pre/ExEM cells were induced from human naïve PSCs expanded in HENSM conditions for at least 3  
7 passages as described above. For induction HENSM cells were plated on gelatin-MEF coated plates the  
8 day before induction with 10 µM ROCKi Y27632, next day medium was changed to RCL for 72h<sup>131</sup>. RCL  
9 is composed of: 480 ml RPMI media (GIBCO 21875-03), 10 ml B27 minus insulin supplement (Invitrogen  
10 A18956-01), 1 mM GlutaMAX (Invitrogen), 1 % penicillin-streptomycin (Invitrogen), 3 µM CHIR (Axon  
11 Medchem 1386) and 10 ng/ml LIF (Peprotech 300-05). RCL medium contains the same composition as  
12 RACL but without adding recombinant Activin. WT human naïve PSCs or iGATA4/iGATA6 cell lines  
13 were employed for induction in the presence or absence of DOX as indicated. All the process was incubated  
14 in a 37C incubator with 5% O<sub>2</sub> and 5% CO<sub>2</sub>.

### 15 16 **Generation of human stem cell embryo models (SEMs)**

17 A step-by-step detailed protocol will be accompanying this work upon final publication. Briefly, To generate  
18 SEMs from human naïve PSCs, three starting cell mixtures were co-aggregated using AggreWell 24-well  
19 plate 400 (STEMCELL Technologies 34415):

- 20 1) Naïve PSC (nPSC) WT cells cultured in HENSM medium in a 5% CO<sub>2</sub> incubator at 5% O<sub>2</sub> at  
21 37C.
- 22 2) For the primitive endoderm and extra-embryonic mesoderm compartments (PrE/ExEM), naïve  
23 WT cells were plated on irradiated MEF (mouse embryonic fibroblast conditions)/Gelatin  
24 coated plates in HENSM supplemented with ROCKi 10 µM (Axon Medchem 1683). The next  
25 day, cells were washed with PBS twice (without harvesting), and HENSM was replaced by  
26 RCL medium. RCL was kept for 72h with 24h medium exchanges in a CO<sub>2</sub> incubator at 5%  
27 O<sub>2</sub> at 37C.
- 28 3) For the trophectoderm lineage, naïve WT cells were plated on feeder free conditions (Matrigel)  
29 in HENSM supplemented with ROCKi 10 µM. The next day, cells were washed with PBS  
30 twice (without harvesting), and HENSM was replaced with BAP medium for 24 hours,  
31 following by replacement with APJ for another 48 hours in a 5% CO<sub>2</sub> incubator at 5% O<sub>2</sub> at  
32 37C (termed BAP(J) protocol).

33

1 Co-aggregation was defined as time point 0 of the protocol. 12-24h before aggregation all donor  
2 cells were supplemented with ROCKi 10  $\mu$ M (Axon Medchem 1683). At the day of aggregation (day 0),  
3 AggreWell 400 24-well plate preparation was done according to manufacturer instructions. Briefly, 500  $\mu$ l  
4 of anti-adherence rinsing solution (STEMCELL Technologies 07010) was added to each well, the plate  
5 was centrifuged at 2,000g for 5 minutes and incubated 30 min at room temperature. Subsequently, rinsing  
6 solution was removed and the plate was washed with PBS. Each well was filled with 500  $\mu$ L of aggregation  
7 medium and kept at 37° C for medium equilibration. Aggregation medium (BSA supplemented N2B@7  
8 media) consisted in 500ml 1:1 mix of Neurobasal (Invitrogen 21103-049) and DMEM/F12 (Invitrogen  
9 21331), 5 ml penicillin-streptomycin (Biological Industries 03-033-1B), 5 ml GlutaMAX (Invitrogen  
10 35050061), 5 ml NEAA (Biological Industries 01-340-1B), 5 ml Sodium Pyruvate (Biological Industries  
11 03-042-1B), 10 ml B27 supplement (Invitrogen 17504-044), 5 ml N2 supplement (Invitrogen 17502048),  
12 1 ml  $\beta$ -mercaptoethanol 50mM (Gibco 31350-010), 2.25ml of BSA solution 35% (Merck 9048-46-8).

13  
14 The three cell populations were collected with TrypLE (Thermo Fisher 12604054) (3 minutes for  
15 the HENSM and RCL-induced cell populations, and 5 minutes for the BAP(J)-induced cells) at 37° C,  
16 Afterwards TrypLE was removed with vacuum and the cells were incubated for two minutes at room  
17 temperature and cells were subsequently collected with PBS. Cells were centrifuged at 1300 rpm for 3-5  
18 minutes and resuspended in aggregation medium. Next, RCL-induced cells were plated on gelatinized  
19 tissue culture plates on MEF medium consisting on 500ml DMEM (Gibco 41965-039) 20% FBS (Sigma,  
20 F7524-500ml), 5 ml penicillin-streptomycin (Biological Industries 03-033-1B), 5 ml GlutaMAX  
21 (Invitrogen 35050061), 5 ml NEAA (Biological Industries 01-340-1B), 5 ml Sodium Pyruvate (Biological  
22 Industries 03-042-1B), for MEF depletion for 30 minutes at 37° C. At the end of MEF depletion, the  
23 supernatant was collected and passed through a 70 $\mu$ M cell strainer, and all three cell types were centrifuged  
24 separately and resuspended and passed through a 70  $\mu$ M cell strainer in N2B27 medium. The three cell  
25 fractions were counted and combined as follows in an Aggrewell 400 plate: Ratio of 1:1:3 (HENSM: RCL:  
26 BAPJ) or (Epi: PrE/ExEM: TE) = 28800 Epi (HENSM) cells, 28800 Pre/ExEM (RCL) cells, and 86400 TE  
27 (BAPJ) cells per 24-well . Cell number per single microwell = 120 cells. Cells were prepared on a 2x  
28 concentration with 20  $\mu$ M ROCKi, 500  $\mu$ l of cell-mix suspension was gently added drop wise to each well  
29 of the AggreWell plate (1ml final volume 10 $\mu$ M final ROCKi concentration). The plate was centrifuged at  
30 100g for 3 minutes and incubated at 37 °C in hypoxic conditions (5% O<sub>2</sub> and 5% CO<sub>2</sub>)

31  
32 Next day (day 1), 900  $\mu$ L of medium were gently removed from each well and replaced with 1 ml  
33 of pre-equilibrated aggregation (N2B27-BSA) medium. The same volume of medium was replaced at day  
34 2. At aggregation day 3, aggregates were gently transferred to 6-well cell suspension culture plates (Greiner,



1 657185) filled with 3 ml of pre-equilibrated EUCM2 (20% FBS) per well and placed on an orbital shaker  
2 rotating at 60 rpm (Thermo Scientific 88881102 + 88881123) located inside a 5% CO<sub>2</sub> incubator in 20%  
3 O<sub>2</sub>. On day 4, 2 ml of medium were gently removed per well and were replaced with 2 ml of pre-heated  
4 EUCM 2 (with 30% FBS). Same procedure was repeated on day 5, refreshing with 2 ml of EUCM2. After  
5 6 days, 2 ml of medium were gently removed per six-well and were replaced with 2 ml of pre-heated  
6 EUCM2 with 50% FBS. Same procedure was repeated at day 7 and cultures were finished at day 8 post-  
7 aggregation. Alternatively, human SEMs can be cultured from day 6 to 8 using the roller culture platform  
8 adapted to an electronic gas regulator module using EUCM2 50% FBS with similar outcome. EUCM2 is  
9 formulated as follows: Advanced DMEM/F12 (GIBCO 21331-020), extra added 1 mM Sodium pyruvate  
10 (Sigma-Aldrich, S8636), 0.5% CMRL media (GIBCO 11530037), extra added 1 mg/mL D(+)-Glucose  
11 Monohydrate (J.T. Baker - 0113) (e.g. add 500mg per 500mL media), 1 mM GlutaMAX (GIBCO,  
12 35050061), 1% penicillin streptomycin (Biological Industries – Sartorius 03-031-1B), 1x of ITS-X  
13 supplement (Thermo Fisher Scientific 51500-056), 8 nM B-estradiol (Sigma-Aldrich, E8875), 200 ng/ml  
14 progesterone (Sigma-Aldrich, P0130), 25 μM N-acetyl-L-cysteine (Sigma-Aldrich, A7250), 20-50% FBS  
15 (Sigma Aldrich F7524 – heat inactivated and filtered) as indicated in **Fig. 2b**. Culture media was pre-heated  
16 for at least an hour by placing it inside a CO<sub>2</sub> incubator at 37°C.

17

### 18 **Human blastoid generation and PALLY/PALY conditions**

19 Human blastoids were generated according to Kagawa et al<sup>22</sup> with few modifications. WIBR3 hESCs were  
20 grown in HENSM for at least 3 passages on feeder free conditions (1% Matrigel coated plates) and were  
21 used for generating human blastoids. After 3 days of growth of naïve PSC were harvested and counted and  
22 55 cells were seeded per microwell (total of 66,000 cells were seeded per 24-well in 1 ml of medium)  
23 AggreWell 400 24-well (Stemcell Technologies cat 34415) in N2B27-BSA supplemented with 10 μM  
24 ROCKi Y27632. The next day medium was changed to PALLY consisting of N2B27 base with 1 μM  
25 MEKi/ERKi PD0325901 (Axon Medchem 1408), 1 μM TGFRi A83-01 (Axon Medchem A83-01), 1 μM  
26 LPA (Tocris, 3854), LIF 10ng/ml and 10 μM ROCKi Y27632. This medium was repeated on day 2, but on  
27 day 3 medium was changed for LY (1 μM LPA (Tocris, 3854) and 10 μM ROCKi Y27632) for another  
28 48h. Afterwards human blastoids were manually selected and collected for further analysis. The entire  
29 was conducted in 5% O<sub>2</sub> and 5% CO<sub>2</sub> conditions.

30

### 31 **Mouse SEM generation**

32 Mouse SEM aggregations were made according to Tarazi et al<sup>27</sup>. Mouse animal experiments  
33 pertained only to mouse SEM and were performed according to the Animal Protection Guidelines of  
34 Weizmann Institute of Science and approved by the following Weizmann Institute IACUC (#01390120-1,

1 01330120-2, 33520117-2). Mouse aggregation medium was also tested for human SEMs but was found  
2 inappropriate. Mouse aggregation medium (mouse AM) consisted of 1x DMEM (GIBCO-41965)  
3 supplemented with 20% FBS (Sigma), 1 mM GlutaMAX (GIBCO, 35050061), 1% penicillin streptomycin  
4 (Biological Industries – Sartorius 03-031-1B), 1% Sodium Pyruvate (Biological Industries – Sartorius 03-  
5 042-1B), 1% non-essential amino acids (Biological Industries – Sartorius 01-340-1B) and 0.1 mM  $\beta$ -  
6 mercaptoethanol (Thermo 31350010).

7

## 8 **Morphological evaluation of human early development and efficiency calculations**

9 Assessment of appropriate human development was performed by careful analysis of available *in-*  
10 *utero* histological embryo collections (predominantly Carnegie collection), taking in account different  
11 epithelium morphology and structure organization through different stages of development. Furthermore,  
12 available work on primate development was employed as a reference for anatomical structure<sup>132–134</sup>,  
13 specific markers of each of the compartments was inferred from previous ex-utero human development  
14 works<sup>135,136</sup>, in-vitro differentiation protocols and primate existing databases<sup>132</sup>.

15 Most of human histological descriptions and figures used for this paper are mentioned in the virtual  
16 human embryo website (<https://www.ehd.org/virtual-human-embryo/>) and available human embryology  
17 textbooks (Langman, Larsen, Carlson).

18 All human in utero data and figures included in this study were made only from Carnegie  
19 collections after obtaining the appropriate copyright approvals (in process). Only SEMs presenting all the  
20 previously defined features were considered as properly developed. Percentage of human SEMs generation  
21 is calculated based on the number of properly developed structures observed per random fields of view at  
22 a specific time point on independent experiments, while always relying on immunofluorescence to  
23 corroborate the 3-lineage contribution.

24

## 25 **Quantification and Statistical Analysis**

26 Statistical analyses of real time PCRs were performed in QuantStudio software v1.3 and visualized  
27 in GraphPad Prism 7. Visualization and statistical analyses of the cell numbers and SEM efficiencies were  
28 performed with Python 3.8.5 software using scipy and seaborn libraries. Boxplot graphs indicate medians  
29 with interquartile ranges, the whiskers mark distribution range. The barplots show average values plus s.d.  
30 The dots mark individual numerical values used for visualization of the data distributions and analyses.  
31 Significant difference between two samples was evaluated by the two-sided Mann-Whitney test for non-  
32 normally distributed data.  $p < 0.05$  was considered as statistically significant.

33

## 34 **Immunofluorescence**

1 Cells were fixed in 4% paraformaldehyde in PBS at RT for 10 minutes. Samples were then  
2 washed 3 times in PBS, permeabilized in PBST (PBS with 0.1% Triton X-100) for 10 min, blocked in  
3 PBS/0.05% Tween/5% fetal bovine serum/1% bovine serum albumin for 1h and incubated with primary  
4 antibodies diluted in blocking solution at 4°C overnight. Subsequently, cells were washed in PBS/0.05%  
5 (three times, 5 min each) and incubated with Alexa Fluor (488, 568 and/or 647)-conjugated secondary  
6 antibodies (Jackson ImmunoResearch) diluted in blocking solution (1:200). Samples were counterstained  
7 with 1 µg/ml DAPI for 10 min at RT, washed with PBS three times (5 min each) and mounted with Shandon  
8 Immuno-Mount (Thermo Scientific). The antibodies and dilutions employed for cell immunofluorescence  
9 were the following: Rabbit polyclonal anti-Cdx2 (Cell Signaling Cat# 3977) 1:200; Mouse monoclonal  
10 anti-Cdx2 (Biogenex Cat# MU392A-UC) 1:200; Rabbit polyclonal anti Gata4 (Abcam Cat# Ab84593)  
11 1:120; Rabbit monoclonal anti-Foxa2 (Abcam Cat# Ab108422) 1:100; Goat polyclonal anti-Sox17 (R&D  
12 Cat# AF1924) 1:200; Mouse monoclonal anti-Oct4 (clone C-10) (Santa Cruz Cat# SC-5279) 1:200; Rabbit  
13 monoclonal Cdx2 (Abcam Cat# ab76541) 1:200; Goat Monoclonal Tfp2c (R&D Cat# AF5059) 1:200;  
14 Rabbit monoclonal Cytokeratin 7 (Abcam Cat# ab181598) 1:200; Rabbit monoclonal Cytokeratin 7  
15 (Abcam Cat# ab68459) 1:200; Rabbit monoclonal Nanog (Abcam Cat# ab109250) 1:200; Mouse  
16 monoclonal Gata3 (Invitrogen Cat# MA1-028) 1:200; Goat polyclonal Gata3 (R&D Cat# AF2605) 1:200;  
17 Mouse monoclonal HCG-Beta (Abcam Cat# ab9582) 1:200; Rabbit monoclonal Gata6 (Cell signaling Cat#  
18 5951) 1:200; Goat polyclonal Oct3/4 (R&D Cat# AF1759) 1:200; Goat polyclonal Gata6 (R&D Cat#  
19 AF1700) 1:200; Rabbit monoclonal Syndecan1 (Abcam Cat# ab128936) 1:500; Rabbit monoclonal  
20 PDGFR-A (Abcam Cat# ab134123) 1:100; Goat polyclonal Nidogen2 (R&D Cat# AF3385) 1:100.

21

## 22 **Flow cytometry**

23 Flow cytometry analysis were done on a BD FACS-Aria III. Cells were harvested with TrypLE  
24 and washed once with PBS afterwards they incubated for half an hour with conjugated primary antibodies  
25 (5ul) on 100ul PBS/0.5% BSA. The primary antibodies used are as follows: Mouse monoclonal TROP2-  
26 488 labeled (R&D Cat# FAB650G); Mouse monoclonal TROP2-PE labeled (R&D Cat# FAB60P); Mouse  
27 monoclonal CD249 (ENPEP)-BV421 labeled (BD Cat# 744872); Rat monoclonal anti mouse CD140a  
28 (PDFGR-a)-PE/Cy7 labeled (BioLegend Cat# 135912); Mouse monoclonal anti human CD140a (PDFGR-  
29 a)-PE/Cy7 labeled (BioLegend Cat# 323508); Mouse monoclonal anti human CD140a (PDFGR-a)-APC  
30 labeled (BioLegend Cat# 323512). FSC and SSC singlets were gated, and only single cells were considering  
31 for all analyses. An unstained control was employed to determine the negative/positive populations for all  
32 antibodies, ensuring that 100% of the unstained population was allocated on the negative area of the  
33 histogram/dot plot.

34

## 1 **Confocal microscopy**

2 The immunofluorescence images were acquired using a Zeiss LSM 700, as well as a LSM 800  
3 inverted confocal microscopes (Zeiss), both equipped with 405 nm, 488 nm, 555 nm and 635 nm solid state  
4 lasers, using a Plan-Apochromat 20× air objective (numerical aperture 0.8) or an EC Plan Neofluar 10× air  
5 objective (numerical aperture 0.3). For a detailed description of the imaging parameters, see **Table S1**.  
6 Images and maximum intensity projections were processed using Fiji <sup>137</sup>, Zen 2 blue edition software 2011  
7 (Zeiss), and Adobe Illustrator CC.

## 8 **Light-sheet microscopy**

9 The immunofluorescence images were acquired using Zeiss Z7 light-sheet microscope, equipped  
10 with 405 nm, 488 nm, 561 nm, and 638 nm lasers, using a single water 20x Plan-Apochromat (numerical  
11 aperture 1.0) detection objective (Zeiss) and two air 10x Plan-Apochromat (numerical aperture 0.2)  
12 illumination objectives (Zeiss). The single sample was imaged at a time, mounted in 1% low-melting  
13 temperature agarose inside the imaging chamber filled with PBS. Light-sheet volumes along the Z-axis  
14 were acquired in a dual scanning mode, using a pivot scan. Light-sheet thickness was set to 3.77 μm, and  
15 laser power in the 1 – 50% range was applied. Frame size, 1920x1920 px, exposure time, 50 msec. The  
16 light-sheets for left- and right-side illuminations were adjusted independently inside the sample volume for  
17 each channel based on the signal intensity in the focal plane of the detection lens. See also **Table S1**.

## 18 **Electronically controlled ex utero roller culture platform**

19 Human SEMs can be kept in the ex utero electronically controlled roller culture platform after day  
20 6 <sup>138</sup> which provides continuous flow of oxygenating gas. The system consists of an electronic gas  
21 modulating unit (Arad Technologies) adapted to the roller culture unit from B.T.C. Engineering, – Cullum  
22 Starr Precision Engineering Ltd - UK)<sup>139</sup>, as previously described <sup>138</sup>. On day 7, all human SEMs from one  
23 well of the 6-well plate were picked and transferred to glass culture bottles (50-100 structures per bottle)  
24 containing 4 mL of fresh EUCM2 50% FBS. The bottles were placed on the rolling culture system, rotating  
25 at 30 revolutions per minute at 37°C, and continuously gassed with an atmosphere of 21% O<sub>2</sub>, 5% CO<sub>2</sub> at  
26 6.5-8 pounds per square inch (psi). Bottles were kept inside glass culture bottles rotating on a spinning  
27 wheel allocated inside a “precision” incubator system (BTC01 model with gas bubbler kit - by B.T.C.  
28 Engineering, – Cullum Starr Precision Engineering Ltd - UK). (BTC 04). Gas flows from the gas mix box  
29 through the inlet into the humidifier water bottle, and then to the inside of the bottles in the rotating drum.  
30 The rate of bubbles created inside an outlet-test tube filled with water is used to monitor speed of the gas  
31 flow. The bubble rate was adjusted using the valve on the lid of the water bottle to the first point where  
32 continuous bubbling is observed, which generally corresponds to 0.06-0.1 psi and 50-75ml/min gas flow.  
33  
34

1 A black cloth was used cover the incubator to provide protection against phototoxicity. 2 ml of EUCM2  
2 with 50% FBS was used in the roller culture for human SEMs at these stages.

### 4 **RNA extraction & RT-PCR analysis**

5 Total RNA was isolated using RNeasy mini kit (Qiagen) following manufacturer instructions.  
6 After, 1 µg of total RNA was reverse transcribed using a High-Capacity Reverse Transcription Kit (Applied  
7 Biosystems). RT-PCR was performed in triplicate using SYBR Green PCR Master Mix (Qiagen) and run  
8 on Viiia7 platform (Applied Biosystems). Values were normalization to Actin and/or Gapdh across all  
9 experiments. Data are presented as fold difference compared to reference sample, which is set as 1. RT-  
10 PCR primer list used listed in **Table S2**.

### 12 **Chromium 10X single cell RNA sequencing**

13 Human SEMs grown ex utero were manually selected and harvested for single cell RNA  
14 sequencing (**Table S3**) using the Chromium Next GEM Single Cell 3' platform (V3.1). All human SEMs  
15 analyzed by scRNA-seq were generated by co-aggregating WT WIBR3 naïve ESC lines grown in HENSM  
16 with RCL-induced or BAPJ-induced WT cells. All SEMs samples were processed including  
17 extraembryonic compartments without any dissection. SEMs were dissociated with Trypsin-EDTA solution  
18 C (0.05%) for 10 minutes (Biological Industries; 030501B). Trypsin was neutralized using media with 10%  
19 FBS, and cells were washed and resuspended in 1x PBS with 400 µg/ml BSA. Cell suspension was filtered  
20 with a 100 µm cell strainer to remove cell clumps. Cell viability of at least 90% was determined by trypan  
21 blue staining for all samples. Cells were diluted at a final concentration of 1000 cells/µL in 1x PBS with  
22 400 µg/ml BSA. scRNA-seq libraries were generated using the 10x Genomics Chromium v3.1 Dual Index  
23 system (5000 cell target cell recovery) and sequenced using Illumina NovaSeq 6000 platform according to  
24 the manufacturer's instructions.

### 26 **10X Single cell RNA-seq analysis**

27 10x Genomics data analysis was performed using Cell Ranger 7.1.0 software (10x Genomics) for  
28 pre-processing of raw sequencing data, and Seurat 4.3.0 for downstream analysis. To filter out low-  
29 expressing single cells, possible doublets produced during the 10x sample processing, or single cells with  
30 extensive mitochondrial expression, we filtered out cells with under 1000 expressing genes, over 8,000  
31 expressing genes and over 15% mitochondrial gene expression. Seurat integrated analysis and anchoring  
32 of all individual samples was performed and then normalized by log-normalization using a scale-factor of  
33 10,000. The top 2,000 variable genes were identified by the variance stabilizing transformation method,  
34 and subsequently scaled and centered. Principal components analysis was performed for dimensional

1 examination using the ‘elbow’ method. The first 10 dimensions showed the majority of data variability.  
2 Therefore, UMAP dimensional reduction was performed on the first 10 dimensions in all samples. Clusters  
3 were detected using Seurat Find Clusters function, with resolution parameter =0.5. Dot-plot describing  
4 expression and prevalence of specific genes was generated using Seurat DotPlot() function. Projection of  
5 selected genes on SEM UMAP was generated with Seurat FeaturePlot() function.

## 6 7 **Projection on Human Embryo Reference**

8 The human embryo reference was built by integrating previously published datasets consisting of 5 human  
9 embryonic data sets spanning in vitro cultured human blastocysts<sup>24,118,119</sup>, 3D- in vitro cultured human  
10 blastocysts until pre-gastrulation stages<sup>120</sup>, and a Carnegie Stage 7 (CS7) 16-19dpf human gastrula<sup>117</sup>, as  
11 previously described<sup>101</sup> (manuscript in final preparation). The raw counts for cells of human SEMs were  
12 aggregated within neighborhood nodes as calculated by Milo (Dann et al 2022) resulting in 945 nodes,  
13 followed by projecting the summed counts matrix onto the assembled Human embryo reference (**Fig. 6e**).

## 14 15 **Mouse Extra-embryonic annotation analysis**

16 Rhox5 positive cells (>1 counts) were chosen for the analysis of extra-embryonic tissue. The cells were  
17 annotated based on marker genes as previously conducted in<sup>77</sup>, such that if at least 4 markers (3 in the case  
18 of SpA-TGC and SpT-Gly) were expressed (>0 counts), the cell was annotated in that category. 26% of the  
19 annotated cells, were annotated by multiple categories. The markers are as following: Chorion (Irx4, Esx1,  
20 Id1, Id3, Phlda2, Klfh13), Chorion progenitors (Sox3, Dusp6, Nat8l, Bmp4, Sox2, Esrrb, Eomes),  
21 Intermediate Chorion (Ascl2, Fgfr2, Cited1, Gjb3, Ndr1, Irx2, Irx3), uncommitted EPC (Chsy1, Gjb3,  
22 Krt19, Lgals1, Cald1, Ctsl), SpA-TGC (Ctla2a, Pecam1, Ramp3, Igfbp7, Nos3), SpT-Gly (Dlx3, Car2,  
23 Ncam1, Pcdh12, Tpbpa), TGC-progenitors (Adm, Fos11, Hand1, Trpm5, Maged2, Prl5a1), p-TGC (Star,  
24 Serpinb9d, Hsd3b6, Rhox6, Cts7) as in<sup>77</sup>. R ggplot was used to generated scatter plot, along with  
25 geom\_smooth(method="lm").

## 26 27 **Mouse and Human IGV Analysis**

28 Bulk ATAC-seq and RNA-seq profiles in the proximity of selected genes (GATA3, GATA4, GATA6)  
29 are presented using IGV genome browser. Mouse datasets were taken from published datasets<sup>140-142</sup> and  
30 <https://www.ncbi.nlm.nih.gov/geo/query/acc.cgi?acc=GSE181053>, and so were human datasets<sup>125,143,144</sup>.  
31 Mouse enhancers were taken from<sup>141</sup>, human enhancers were taken from GeneHancer<sup>145</sup>. Open regions  
32 that overlap with promoter or exon were excluded from the analysis. Potential enhancers in these regions  
33 were manually curated.

34



## 1 **Data and code availability**

2 All scRNA-seq data are deposited under GEO: **XXXXXXXXXX**

3 Any other information required to reanalyze the data reported in this work is available upon request from  
4 the corresponding authors upon request authors.

5

## 6 **References**

7

- 8 1. Rossant, J. & Tam, P. P. L. Opportunities and Challenges with Stem Cell-Based Embryo  
9 Models. *Stem Cell Reports*, (2021).
- 10 2. Rossant, J. & Tam, P. P. L. New Insights into Early Human Development: Lessons for  
11 Stem Cell Derivation and Differentiation. *Cell Stem Cell* **20**, 18–28 (2017).
- 12 3. Ma, H. *et al.* Correction of a pathogenic gene mutation in human embryos. *Nature* **548**, 1–  
13 24 (2017).
- 14 4. De Bakker, B. S. *et al.* An interactive three-dimensional digital atlas and quantitative  
15 database of human development. *Science (1979)* **354**, (2016).
- 16 5. Xiang, L. *et al.* A developmental landscape of 3D-cultured human pre-gastrulation  
17 embryos. *Nature* **577**, 537–542 (2020).
- 18 6. Shahbazi, M. N. *et al.* Self-organization of the human embryo in the absence of maternal  
19 tissues. *Nat Cell Biol* **18**, 700–708 (2016).
- 20 7. Deglincerti, A. *et al.* Self-organization of the in vitro attached human embryo. *Nature* **533**,  
21 251–254 (2016).
- 22 8. De Los Angeles, A. *et al.* Hallmarks of pluripotency. *Nature* **525**, 469–478 (2015).
- 23 9. Hackett, J. A. & Surani, M. A. Regulatory principles of pluripotency: from the ground  
24 state up. *Cell Stem Cell* **15**, 416–430 (2014).
- 25 10. Yang, Y. *et al.* Derivation of Pluripotent Stem Cells with In~Vivo Embryonic and  
26 Extraembryonic Potency. *Cell* **169**, 243--257.e25 (2017).
- 27 11. Sanaki-Matsumiya, M. *et al.* Periodic formation of epithelial somites from human  
28 pluripotent stem cells. *Nat Commun* **13**, (2022).
- 29 12. Yamanaka, Y. *et al.* Reconstituting human somitogenesis in vitro. *Nature* **614**, 509–520  
30 (2023).
- 31 13. Miao, Y. *et al.* Reconstruction and deconstruction of human somitogenesis in vitro.  
32 *Nature* **614**, 500–508 (2023).
- 33 14. Matsuda, M. *et al.* Recapitulating the human segmentation clock with pluripotent stem  
34 cells. *Nature* **580**, 124–129 (2020).
- 35 15. van den Brink, S. C. *et al.* Single-cell and spatial transcriptomics reveal somitogenesis in  
36 gastruloids. *Nature* **582**, 405–409 (2020).
- 37 16. Van Den Brink, S. C. *et al.* Symmetry breaking, germ layer specification and axial  
38 organisation in aggregates of mouse embryonic stem cells. *Development (Cambridge)*  
39 **141**, 4231–4242 (2014).
- 40 17. Turner, D. A. *et al.* Anteroposterior polarity and elongation in the absence of  
41 extraembryonic tissues and of spatially localised signalling in gastruloids: Mammalian  
42 embryonic organoids. *Development (Cambridge)* **144**, 3894–3906 (2017).
- 43 18. Zheng, Y. *et al.* Controlled modelling of human epiblast and amnion development using  
44 stem cells. *Nature* **573**, 421–425 (2019).

- 1 19. Shao, Y. *et al.* Self-organized amniogenesis by human pluripotent stem cells in a  
2 biomimetic implantation-like niche. *Nat Mater* **16**, 419–427 (2017).
- 3 20. Shao, Y. *et al.* A pluripotent stem cell-based model for post-implantation human amniotic  
4 sac development. *Nat Commun* **8**, 1–15 (2017).
- 5 21. Moris, N. *et al.* An in vitro model of early anteroposterior organization during human  
6 development. *Nature* **582**, 410–415 (2020).
- 7 22. Kagawa, H. *et al.* Human blastoids model blastocyst development and implantation.  
8 *Nature* **601**, 600–605 (2022).
- 9 23. Yu, L. *et al.* Blastocyst-like structures generated from human pluripotent stem cells.  
10 *Nature* vol. 591 (2021).
- 11 24. Yanagida, A. *et al.* Naive stem cell blastocyst model captures human embryo lineage  
12 segregation. doi:10.1016/j.stem.2021.04.031.
- 13 25. Liu, X. *et al.* Modelling human blastocysts by reprogramming fibroblasts into iBlastoids.  
14 *Nature* **591**, 627 (2021).
- 15 26. Rivron, N. C. *et al.* Blastocyst-like structures generated solely from stem cells. *Nature*  
16 **557**, 106–111 (2018).
- 17 27. Tarazi, S. *et al.* Post-gastrulation synthetic embryos generated ex utero from mouse naive  
18 ESCs. *Cell* **185**, 3290–3306.e25 (2022).
- 19 28. Lau, K. Y. C. *et al.* Mouse embryo model derived exclusively from embryonic stem cells  
20 undergoes neurulation and heart development. *Cell Stem Cell* **29**, 1445–1458.e8 (2022).
- 21 29. Leitch, H. G. *et al.* Naive pluripotency is associated with global DNA hypomethylation.  
22 *Nat Struct Mol Biol* **20**, 311–316 (2013).
- 23 30. Pastor, W. A. *et al.* TFAP2C regulates transcription in human naive pluripotency by  
24 opening enhancers. *Nat Cell Biol* (2018) doi:10.1038/s41556-018-0089-0.
- 25 31. Kalkan, T. *et al.* Complementary Activity of ETV5, RBPJ, and TCF3 Drives Formative  
26 Transition from Naive Pluripotency. *Cell Stem Cell* (2019)  
27 doi:10.1016/j.stem.2019.03.017.
- 28 32. Gafni, O. *et al.* Derivation of novel human ground state naive pluripotent stem cells.  
29 *Nature* **504**, 282–286 (2013).
- 30 33. Theunissen, T. W. *et al.* Systematic identification of culture conditions for induction and  
31 maintenance of naive human pluripotency. *Cell Stem Cell* **15**, 471–487 (2014).
- 32 34. Bredenkamp, N. *et al.* Wnt Inhibition Facilitates RNA-Mediated Reprogramming of  
33 Human Somatic Cells to Naive Pluripotency. *Stem Cell Reports* **13**, 1083–1098 (2019).
- 34 35. Bayerl, J. *et al.* Principles of signaling pathway modulation for enhancing human naive  
35 pluripotency induction. *Cell Stem Cell* **28**, 1549–1565.e12 (2021).
- 36 36. Io, S. *et al.* Capturing human trophoblast development with naive pluripotent stem cells in  
37 vitro. *Cell Stem Cell* **28**, 1023–1039.e13 (2021).
- 38 37. Takashima, Y. *et al.* Resetting Transcription Factor Control Circuitry toward Ground-  
39 State Pluripotency in Human. *Cell* **158**, 1254–1269 (2014).
- 40 38. Di Stefano, B. *et al.* Reduced MEK inhibition preserves genomic stability in naive human  
41 embryonic stem cells. *Nat Methods* (2018) doi:10.1038/s41592-018-0104-1.
- 42 39. Niwa, H. *et al.* Interaction between Oct3/4 and Cdx2 Determines Trophectoderm  
43 Differentiation. *Cell* **123**, 917–929 (2005).
- 44 40. Fujikura, J. *et al.* Differentiation of embryonic stem cells is induced by GATA factors.  
45 *Genes Dev* **16**, 784–9 (2002).

- 1 41. Saykali, B. *et al.* Distinct mesoderm migration phenotypes in extra-embryonic and  
2 embryonic regions of the early mouse embryo. *Elife* **8**, 1–27 (2019).
- 3 42. Ross, C. & Boroviak, T. E. Origin and function of the yolk sac in primate embryogenesis.  
4 *Nat Commun* 1–14 (2020) doi:10.1038/s41467-020-17575-w.
- 5 43. Arnold, S. J. & Robertson, E. J. Making a commitment: Cell lineage allocation and axis  
6 patterning in the early mouse embryo. *Nat Rev Mol Cell Biol* **10**, 91–103 (2009).
- 7 44. Cui, G. *et al.* Spatial molecular anatomy of germ layers in the gastrulating cynomolgus  
8 monkey embryo. *Cell Rep* **40**, (2022).
- 9 45. Kinder, S. J. *et al.* The orderly allocation of mesodermal cells to the extraembryonic  
10 structures and the anteroposterior axis during gastrulation of the mouse embryo. **114**,  
11 2705–2710 (2017).
- 12 46. Lockett, W. P. *Origin and differentiation of the yolk sac and extraembryonic mesoderm in*  
13 *presomite human and rhesus monkey embryos. American Journal of Anatomy* vol. 152  
14 (1978).
- 15 47. Tam, P. P. L. & Beddington, R. S. P. The formation of mesodermal tissues in the mouse  
16 embryo during gastrulation and early organogenesis. *Development* **99**, 109–126 (1987).
- 17 48. Fujikura, J. *et al.* Differentiation of embryonic stem cells is induced by GATA factors.  
18 *Genes Dev* **16**, 784–789 (2002).
- 19 49. Schrode, N., Saiz, N., Di Talia, S. & Hadjantonakis, A. K. GATA6 levels modulate  
20 primitive endoderm cell fate choice and timing in the mouse blastocyst. *Dev Cell* **29**, 454–  
21 467 (2014).
- 22 50. Pham, T. X. A. *et al.* Modeling human extraembryonic mesoderm cells using naive  
23 pluripotent stem cells. *Cell Stem Cell* **29**, 1346–1365.e10 (2022).
- 24 51. Amadei, G. *et al.* Inducible Stem-Cell-Derived Embryos Capture Mouse Morphogenetic  
25 Events In Vitro. *Dev Cell* **56**, 366–382.e9 (2021).
- 26 52. Linneberg-Agerholm, M. *et al.* Naïve human pluripotent stem cells respond to Wnt, Nodal  
27 and LIF signalling to produce expandable naïve extra-embryonic endoderm. *Development*  
28 *(Cambridge)* **146**, (2019).
- 29 53. Anderson, K. G. V *et al.* Insulin fine-tunes self-renewal pathways governing naive  
30 pluripotency and extra-embryonic endoderm. *Nat Cell Biol* **19**, 1164–1177 (2017).
- 31 54. Ohinata, Y. *et al.* Establishment of mouse stem cells that can recapitulate the  
32 developmental potential of primitive endoderm. *Science (1979)* **375**, 574–578 (2022).
- 33 55. Bredenkamp, N. *et al.* Wnt Inhibition Facilitates RNA-Mediated Reprogramming of  
34 Human Somatic Cells to Naive Pluripotency. *Stem Cell Reports* (2019)  
35 doi:10.1016/j.stemcr.2019.10.009.
- 36 56. Bredenkamp, N., Stirparo, G. G., Nichols, J., Smith, A. & Guo, G. The Cell-Surface  
37 Marker Sushi Containing Domain 2 Facilitates Establishment of Human Naive Pluripotent  
38 Stem Cells. *Stem Cell Reports* 1–23 (2019).
- 39 57. Linneberg-Agerholm, M. *et al.* Naïve human pluripotent stem cells respond to Wnt, Nodal  
40 and LIF signalling to produce expandable naïve extra-embryonic endoderm. *Development*  
41 *(Cambridge)* **146**, (2019).
- 42 58. Linneberg-Agerholm, M. *et al.* Naïve human pluripotent stem cells respond to Wnt, Nodal  
43 and LIF signalling to produce expandable naïve extra-embryonic endoderm. *Development*  
44 *(Cambridge)* **146**, (2019).

- 1 59. Wamaitha, S. E. *et al.* Gata6 potently initiates reprogramming of pluripotent and  
2 differentiated cells to extraembryonic endoderm stem cells. 1239–1255 (2015)  
3 doi:10.1101/gad.257071.114.
- 4 60. Pham, T. X. A. *et al.* Modeling human extraembryonic mesoderm cells using naive  
5 pluripotent stem cells. *Cell Stem Cell* **29**, 1346–1365.e10 (2022).
- 6 61. Yang, R. *et al.* Amnion signals are essential for mesoderm formation in primates. *Nat*  
7 *Commun* **12**, 1–14 (2021).
- 8 62. Mahlapuu, M., Ormestad, M., Enerbäck, S. & Carlsson, P. The forkhead transcription  
9 factor FoxF1 is required for differentiation of extraembryonic and lateral plate mesoderm  
10 The forkhead transcription factor Foxf1 is required for differentiation of extra- embryonic  
11 and lateral plate mesoderm. (2001) doi:10.1242/dev.128.2.155.
- 12 63. Posfai, E. *et al.* Evaluating totipotency using criteria of increasing stringency. *Nat Cell*  
13 *Biol* **23**, 49–60 (2021).
- 14 64. Tanaka, S., Kunath, T., Hadjantonakis, A. K., Nagy, A. & Rossant, J. Promotion of  
15 trophoblast stem cell proliferation by FGF4. *Science* **282**, 2072–2075 (1998).
- 16 65. Sozen, B. *et al.* Reconstructing aspects of human embryogenesis with pluripotent stem  
17 cells. *Nature Communications 2021 12:1* **12**, 1–13 (2021).
- 18 66. Amita, M. *et al.* Complete and unidirectional conversion of human embryonic stem cells  
19 to trophoblast by BMP4. *Proc Natl Acad Sci U S A* **110**, (2013).
- 20 67. Okae, H. *et al.* Derivation of Human Trophoblast Stem Cells. *Cell Stem Cell* **22**, 50–63.e6  
21 (2018).
- 22 68. Niwa, H. *et al.* Interaction between Oct3/4 and Cdx2 determines trophectoderm  
23 differentiation. *Cell* **123**, 917–929 (2005).
- 24 69. Harrison, S. E., Sozen, B., Christodoulou, N., Kyprianou, C. & Zernicka-Goetz, M.  
25 Assembly of embryonic and extraembryonic stem cells to mimic embryogenesis in vitro.  
26 *Science (1979)* **356**, (2017).
- 27 70. Okae, H. *et al.* Derivation of Human Trophoblast Stem Cells. *Cell Stem Cell* **22**, 50–63.e6  
28 (2018).
- 29 71. Viukov, S. *et al.* Human primed and naïve PSCs are both able to differentiate into  
30 trophoblast stem cells. *Stem Cell Reports* **17**, 2484–2500 (2022).
- 31 72. De Santis, R. & Brivanlou, A. H. The treasure inside human naive pluripotency,  
32 generation of trophectoderm and blastoids. *Cell Stem Cell* **28**, 985–987 (2021).
- 33 73. Io, S. *et al.* Capturing human trophoblast development with naive pluripotent stem cells  
34 in vitro. *Cell Stem Cell* **28**, 1023–1039.e13 (2021).
- 35 74. Guo, G. *et al.* Human naive epiblast cells possess unrestricted lineage potential. *Cell Stem*  
36 *Cell* **28**, 1040–1056.e6 (2021).
- 37 75. Gerri, C. *et al.* Initiation of a conserved trophectoderm program in human, cow and mouse  
38 embryos. *Nature* | **587**, 443 (2020).
- 39 76. Tarazi, S. *et al.* Post-gastrulation synthetic embryos generated ex utero from mouse naive  
40 ESCs. *Cell* **185**, 3290–3306.e25 (2022).
- 41 77. Lau, K. Y. C. *et al.* Mouse embryo model derived exclusively from embryonic stem cells  
42 undergoes neurulation and heart development. *Cell Stem Cell* **29**, 1445–1458.e8 (2022).
- 43 78. Long, H. K., Prescott, S. L. & Wysocka, J. Ever-Changing Landscapes: Transcriptional  
44 Enhancers in Development and Evolution. *Cell* **167**, 1–18 (2016).
- 45 79. Amadei, G. *et al.* Embryo model completes gastrulation to neurulation and organogenesis.  
46 *Nature* **610**, 143–153 (2022).

- 1 80. Kagawa, H. *et al.* Human blastoids model blastocyst development and implantation. *600 / Nature* | **601**, (2022).
- 2
- 3 81. Aguilera-Castrejon, A. *et al.* Ex utero mouse embryogenesis from pre-gastrulation to late organogenesis. *Nature* **593**, (2021).
- 4
- 5 82. O’Rahilly, R. & Müller, F. Developmental stages in human embryos: Revised and new measurements. *Cells Tissues Organs* **192**, 73–84 (2010).
- 6
- 7 83. De Bakker, B. S. *et al.* An interactive three-dimensional digital atlas and quantitative database of human development. *Science (1979)* **354**, (2016).
- 8
- 9 84. Sozen, B. *et al.* Self-assembly of embryonic and two extra-embryonic stem cell types into gastrulating embryo-like structures. *Nat Cell Biol* **20**, 979–989 (2018).
- 10
- 11 85. Amadei, G. *et al.* Inducible Stem-Cell-Derived Embryos Capture Mouse Morphogenetic Events In Vitro. *Dev Cell* **56**, 366–382.e9 (2021).
- 12
- 13 86. Blij, S., Parenti, A., Tabatabai-Yazdi, N. & Ralston, A. Cdx2 Efficiently Induces Trophoblast Stem-Like Cells in Na<sup>+</sup>, but Not Primed, Pluripotent Stem Cells. *Stem Cells Dev* 150310073515000--14 (2015).
- 14
- 15
- 16 87. Yang, R. *et al.* Amnion signals are essential for mesoderm formation in primates. *Nature Communications* 2021 12:1 **12**, 1–14 (2021).
- 17
- 18 88. Niu, Y. *et al.* Dissecting primate early post-implantation development using long-term in vitro embryo culture. *Science (1979)* **366**, (2019).
- 19
- 20 89. Ma, H. *et al.* In vitro culture of cynomolgus monkey embryos beyond early gastrulation. *Science (1979)* **366**, (2019).
- 21
- 22 90. Bergmann, S. *et al.* Spatial profiling of early primate gastrulation in utero. *Nature* **609**, 136–143 (2022).
- 23
- 24 91. Bianchi, D. W., Wilkins-Haug, L. E., Enders, A. C. & Hay, E. D. Origin of extraembryonic mesoderm in experimental animals: Relevance to chorionic mosaicism in humans. *Am J Med Genet* **46**, 542–550 (1993).
- 25
- 26
- 27 92. Knöfler, M. *et al.* Human placenta and trophoblast development: key molecular mechanisms and model systems. *Cellular and Molecular Life Sciences* **76**, 3479–3496 (2019).
- 28
- 29
- 30 93. Florian, J. The Formation of the Connecting Stalk and the Extension of the Amniotic Cavity towards the Tissue of the Connecting Stalk in Young Human Embryos. *J Anat* **64**, 454–476 (1930).
- 31
- 32
- 33 94. Sinha, A. A. Ultrastructure of human amnion and amniotic plaques of normal pregnancy. *Zeitschrift für Zellforschung und Mikroskopische Anatomie* **122**, 1–14 (1971).
- 34
- 35 95. Collier, A. J. *et al.* Comprehensive Cell Surface Protein Profiling Identifies Specific Markers of Human Naïve and Primed Pluripotent States. *Cell Stem Cell* 1–41 (2017).
- 36
- 37 96. Sahakyan, A. *et al.* Human Naïve Pluripotent Stem Cells Model X Chromosome Dampening and X Inactivation. *Cell Stem Cell* 1–36 (2016)
- 38
- 39 doi:10.1016/j.stem.2016.10.006.
- 40 97. Enders, A. C., Schlafke, S. & Hendrickx, A. G. Differentiation of the Embryonic Disc , Amnion , and Yolk Sac in the Rhesus Monkey. **185**, 161–185 (1986).
- 41
- 42 98. Sheng, G., Arias, A. M. & Sutherland, A. The primitive streak and cellular principles of building an amniote body through gastrulation. *Science (1979)* **374**, (2021).
- 43
- 44 99. Kyprianou, C. *et al.* Basement membrane remodelling regulates mouse embryogenesis. *Nature* **582**, 253–258 (2020).
- 45



- 1 100. Molè, M. A. *et al.* A single cell characterisation of human embryogenesis identifies  
2 pluripotency transitions and putative anterior hypoblast centre. *Nat Commun* **12**, 1–12  
3 (2021).
- 4 101. Zhao, C. *et al.* Reprogrammed blastoids contain amnion-like cells but not trophectoderm.  
5 *bioRxiv* 2021.05.07.442980 (2021) doi:10.1101/2021.05.07.442980.
- 6 102. Zheng, Y. *et al.* Controlled modelling of human epiblast and amnion development using  
7 stem cells. *Nature* 1–28 (2019).
- 8 103. Sasaki, K. *et al.* The Germ Cell Fate of Cynomolgus Monkeys Is Specified in the Nascent  
9 Amnion. *Dev Cell* 1–38 (2016).
- 10 104. Rostovskaya, M., Andrews, S., Reik, W. & Rugg-Gunn, P. J. Amniogenesis occurs in two  
11 independent waves in primates. *Cell Stem Cell* **29**, 744–759.e6 (2022).
- 12 105. Sasaki, K. *et al.* The Germ Cell Fate of Cynomolgus Monkeys Is Specified in the Nascent  
13 Amnion. *Dev Cell* **39**, 169–185 (2016).
- 14 106. Saitou, M. & Yamaji, M. Primordial germ cells in mice. *Cold Spring Harb Perspect Biol*  
15 **4**, (2012).
- 16 107. Irie, N. *et al.* Article SOX17 Is a Critical Specifier of Human Primordial Germ Cell Fate.  
17 *Cell* **160**, 253–268 (2015).
- 18 108. Hancock, G. V, Wamaitha, S. E., Peretz, L. & Clark, A. T. Mammalian primordial germ  
19 cell specification. 1–12 (2021) doi:10.1242/dev.189217.
- 20 109. Sasaki, K. *et al.* Robust In~Vitro Induction of Human Germ Cell Fate from Pluripotent  
21 Stem Cells. *Cell Stem Cell* **17**, 178–194 (2015).
- 22 110. Mendez, M. G., Kojima, S. & Goldman, R. D. Vimentin induces changes in cell shape,  
23 motility, and adhesion during the epithelial to mesenchymal transition. *The FASEB*  
24 *Journal* **24**, 1838–1851 (2010).
- 25 111. Turco, M. Y. & Moffett, A. Development of the human placenta. 1–14 (2019)  
26 doi:10.1242/dev.163428.
- 27 112. Carter, A. M., Enders, A. C., Pijnenborg, R. & Carter, A. M. The role of invasive  
28 trophoblast in implantation and placentation of primates. (2015).
- 29 113. Lai, X. *et al.* Epithelial-Mesenchymal Transition and Metabolic Switching in Cancer:  
30 Lessons From Somatic Cell Reprogramming. *Front Cell Dev Biol* **8**, (2020).
- 31 114. Amadei, G. *et al.* Embryo model completes gastrulation to neurulation and organogenesis.  
32 *Nature* 2022 610:7930 **610**, 143–153 (2022).
- 33 115. Irie, N. *et al.* SOX17 is a critical specifier of human primordial germ cell fate. *Cell* **160**,  
34 253–268 (2015).
- 35 116. Pfeffer, P. L. Alternative mammalian strategies leading towards gastrulation: losing polar  
36 trophoblast (Rauber’s layer) or gaining an epiblast cavity. *Philosophical Transactions of*  
37 *the Royal Society B* **377**, (2022).
- 38 117. Tyser, R. C. V. *et al.* Single-cell transcriptomic characterization of a gastrulating human  
39 embryo. *Nature* 2021 600:7888 **600**, 285–289 (2021).
- 40 118. Petropoulos, S. *et al.* Single-Cell RNA-Seq Reveals Lineage and X Chromosome  
41 Dynamics in Human Preimplantation Embryos. *Cell* 1–33 (2016).
- 42 119. Meistermann, D. *et al.* Integrated pseudotime analysis of human pre-implantation embryo  
43 single-cell transcriptomes reveals the dynamics of lineage specification. *Cell Stem Cell* **28**,  
44 1625–1640.e6 (2021).
- 45 120. Xiang, L. *et al.* A developmental landscape of 3D-cultured human pre-gastrulation  
46 embryos. *Nature* 2019 577:7791 **577**, 537–542 (2019).



- 1 121. Jarvis, G. E. & Saunders, P. embryo mortality in natural human reproduction : What the  
2 data say [ version 2 ; referees : 1 approved , 2 approved with reservations ] Referee Status :  
3 (2017) doi:10.12688/f1000research.8937.1.
- 4 122. Bock, C. *et al.* Reference Maps of human ES and iPS cell variation enable high-  
5 throughput characterization of pluripotent cell lines. *Cell* **144**, 439–452 (2011).
- 6 123. Choi, J. *et al.* Prolonged Mek1/2 suppression impairs the developmental potential of  
7 embryonic stem cells. *Nature* **548**, 219–223 (2017).
- 8 124. Pastor, W. A. *et al.* Naive Human Pluripotent Cells Feature a Methylation Landscape  
9 Devoid of Blastocyst or Germline Memory. *Cell Stem Cell* (2016)  
10 doi:10.1016/j.stem.2016.01.019.
- 11 125. Bayerl J *et al.* Principles of Signaling Pathway Modulation for Enhancing Human Naïve  
12 Pluripotency Induction. *Cell Stem Cell AOP*, 1–17 (2021).
- 13 126. Hyun, I. *et al.* ISSCR guidelines for the transfer of human pluripotent stem cells and their  
14 direct derivatives into animal hosts. *Stem Cell Reports* **16**, 1409–1415 (2021).
- 15 127. Gerri, C. *et al.* Initiation of a conserved trophoctoderm program in human, cow and mouse  
16 embryos. *Nature* 2020 587:7834 **587**, 443–447 (2020).
- 17 128. Lengner, C. J. *et al.* Derivation of pre-X inactivation human embryonic stem cells under  
18 physiological oxygen concentrations. *Cell* **141**, 872–883 (2010).
- 19 129. Viukov, S. *et al.* Human primed and naïve PSCs are both able to differentiate into  
20 trophoblast stem cells. *Stem Cell Reports* **17**, 2484–2500 (2022).
- 21 130. Okae, H. *et al.* Derivation of Human Trophoblast Stem Cells. (2018)  
22 doi:10.1016/j.stem.2017.11.004.
- 23 131. Linneberg-Agerholm, M. *et al.* Naïve human pluripotent stem cells respond to Wnt, Nodal  
24 and LIF signalling to produce expandable naïve extra-embryonic endoderm. *Development*  
25 (*Cambridge*) **146**, (2019).
- 26 132. Bergmann, S. *et al.* Spatial profiling of early primate gastrulation in utero. *Nature* 2022  
27 609:7925 **609**, 136–143 (2022).
- 28 133. Ma, H. *et al.* In vitro culture of cynomolgus monkey embryos beyond early gastrulation.  
29 *Science* (1979) **366**, (2019).
- 30 134. Niu, Y. *et al.* Dissecting primate early post-implantation development using long-term in  
31 vitro embryo culture. *Science* (1979) **366**, (2019).
- 32 135. Deglincerti, A. *et al.* Self-organization of the in vitro attached human embryo. *Nature* vol.  
33 533 251–254 Preprint at <https://doi.org/10.1038/nature17948> (2016).
- 34 136. Xiang, L. *et al.* A developmental landscape of 3D-cultured human pre-gastrulation  
35 embryos. *Nature* **577**, 537–542 (2020).
- 36 137. Schindelin, J. *et al.* Fiji: An open-source platform for biological-image analysis. *Nature*  
37 *Methods* vol. 9 676–682 Preprint at <https://doi.org/10.1038/nmeth.2019> (2012).
- 38 138. Aguilera-Castrejon, A. *et al.* Ex utero mouse embryogenesis from pre-gastrulation to late  
39 organogenesis. *Nature* **593**, 119–124 (2021).
- 40 139. Morriss, G. M. & New, D. A. T. Effect of oxygen concentration on morphogenesis of  
41 cranial neural folds and neural crest in cultured rat embryos. *J Embryol Exp Morphol* Vol.  
42 **54**, 17–35 (1979).
- 43 140. Sheban, D. *et al.* SUMOylation of linker histone H1 drives chromatin condensation and  
44 restriction of embryonic cell fate identity. *Mol Cell* **82**, 106-122.e9 (2022).
- 45 141. Argelaguet, R. *et al.* Multi-omics profiling of mouse gastrulation at single-cell resolution.  
46 *Nature* 2019 576:7787 **576**, 487–491 (2019).

- 1 142. Hada, M. *et al.* Highly rigid H3.1/H3.2-H3K9me3 domains set a barrier for cell fate  
2 reprogramming in trophoblast stem cells. *Genes Dev* **36**, 84–102 (2022).  
3 143. Viukov, S. *et al.* Human primed and naïve PSCs are both able to differentiate into  
4 trophoblast stem cells. *Stem Cell Reports* **17**, 2484–2500 (2022).  
5 144. Wu, J. *et al.* Chromatin analysis in human early development reveals epigenetic transition  
6 during ZGA. *Nature 2018 557:7704* **557**, 256–260 (2018).  
7 145. Fishilevich, S. *et al.* GeneHancer: genome-wide integration of enhancers and target genes  
8 in GeneCards. *Database* **2017**, 1–17 (2017).  
9  
10  
11  
12  
13

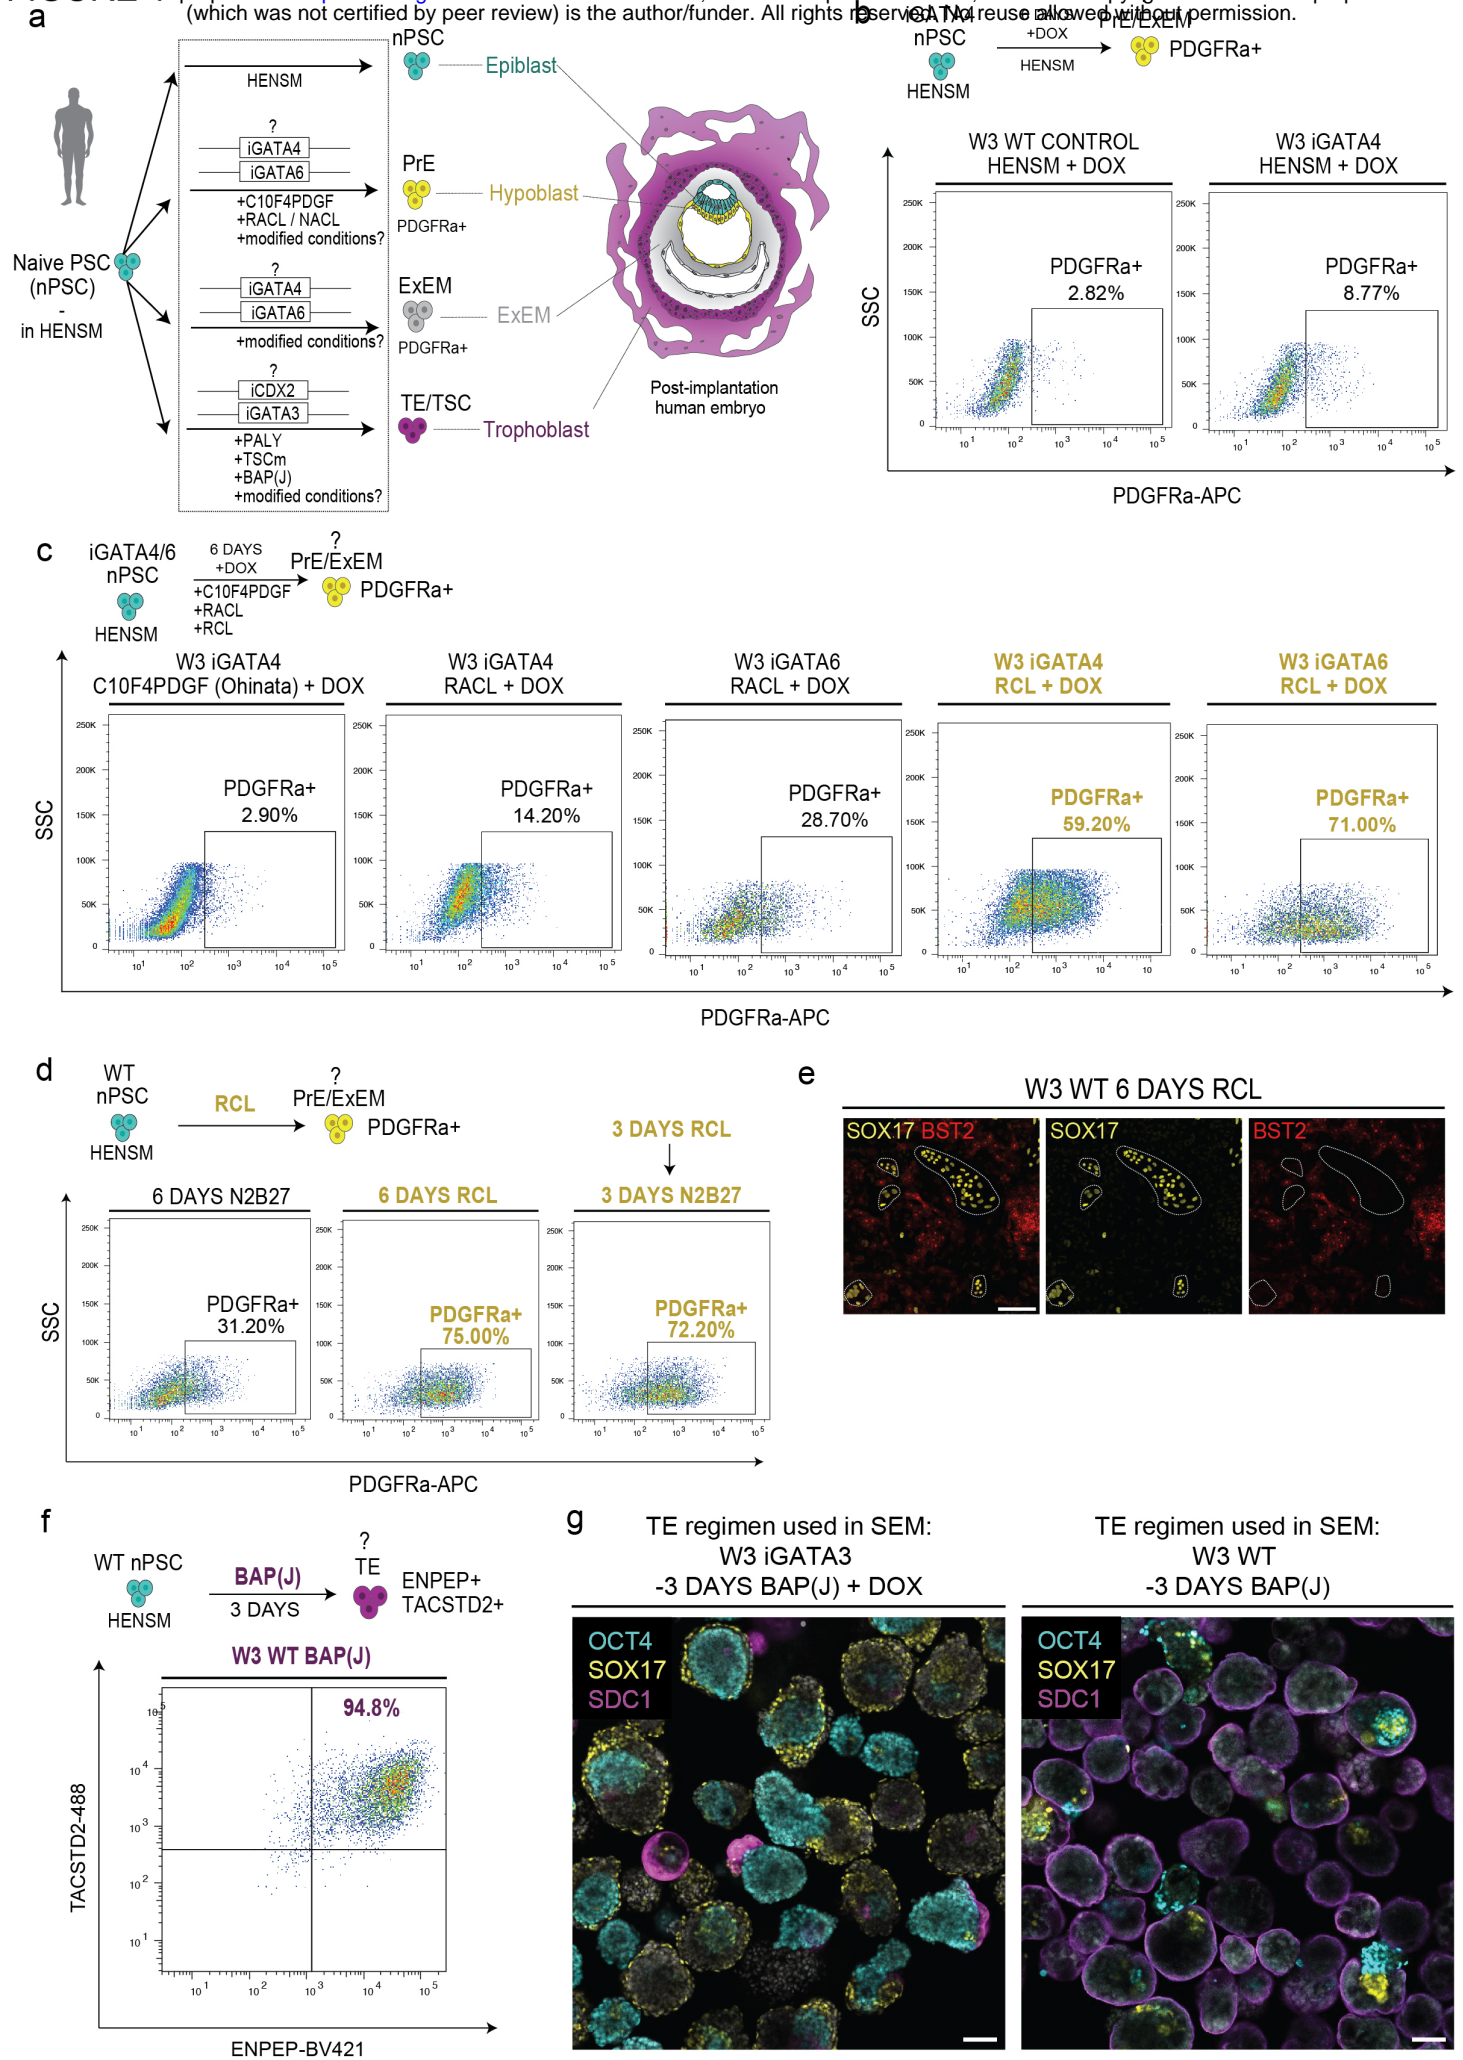



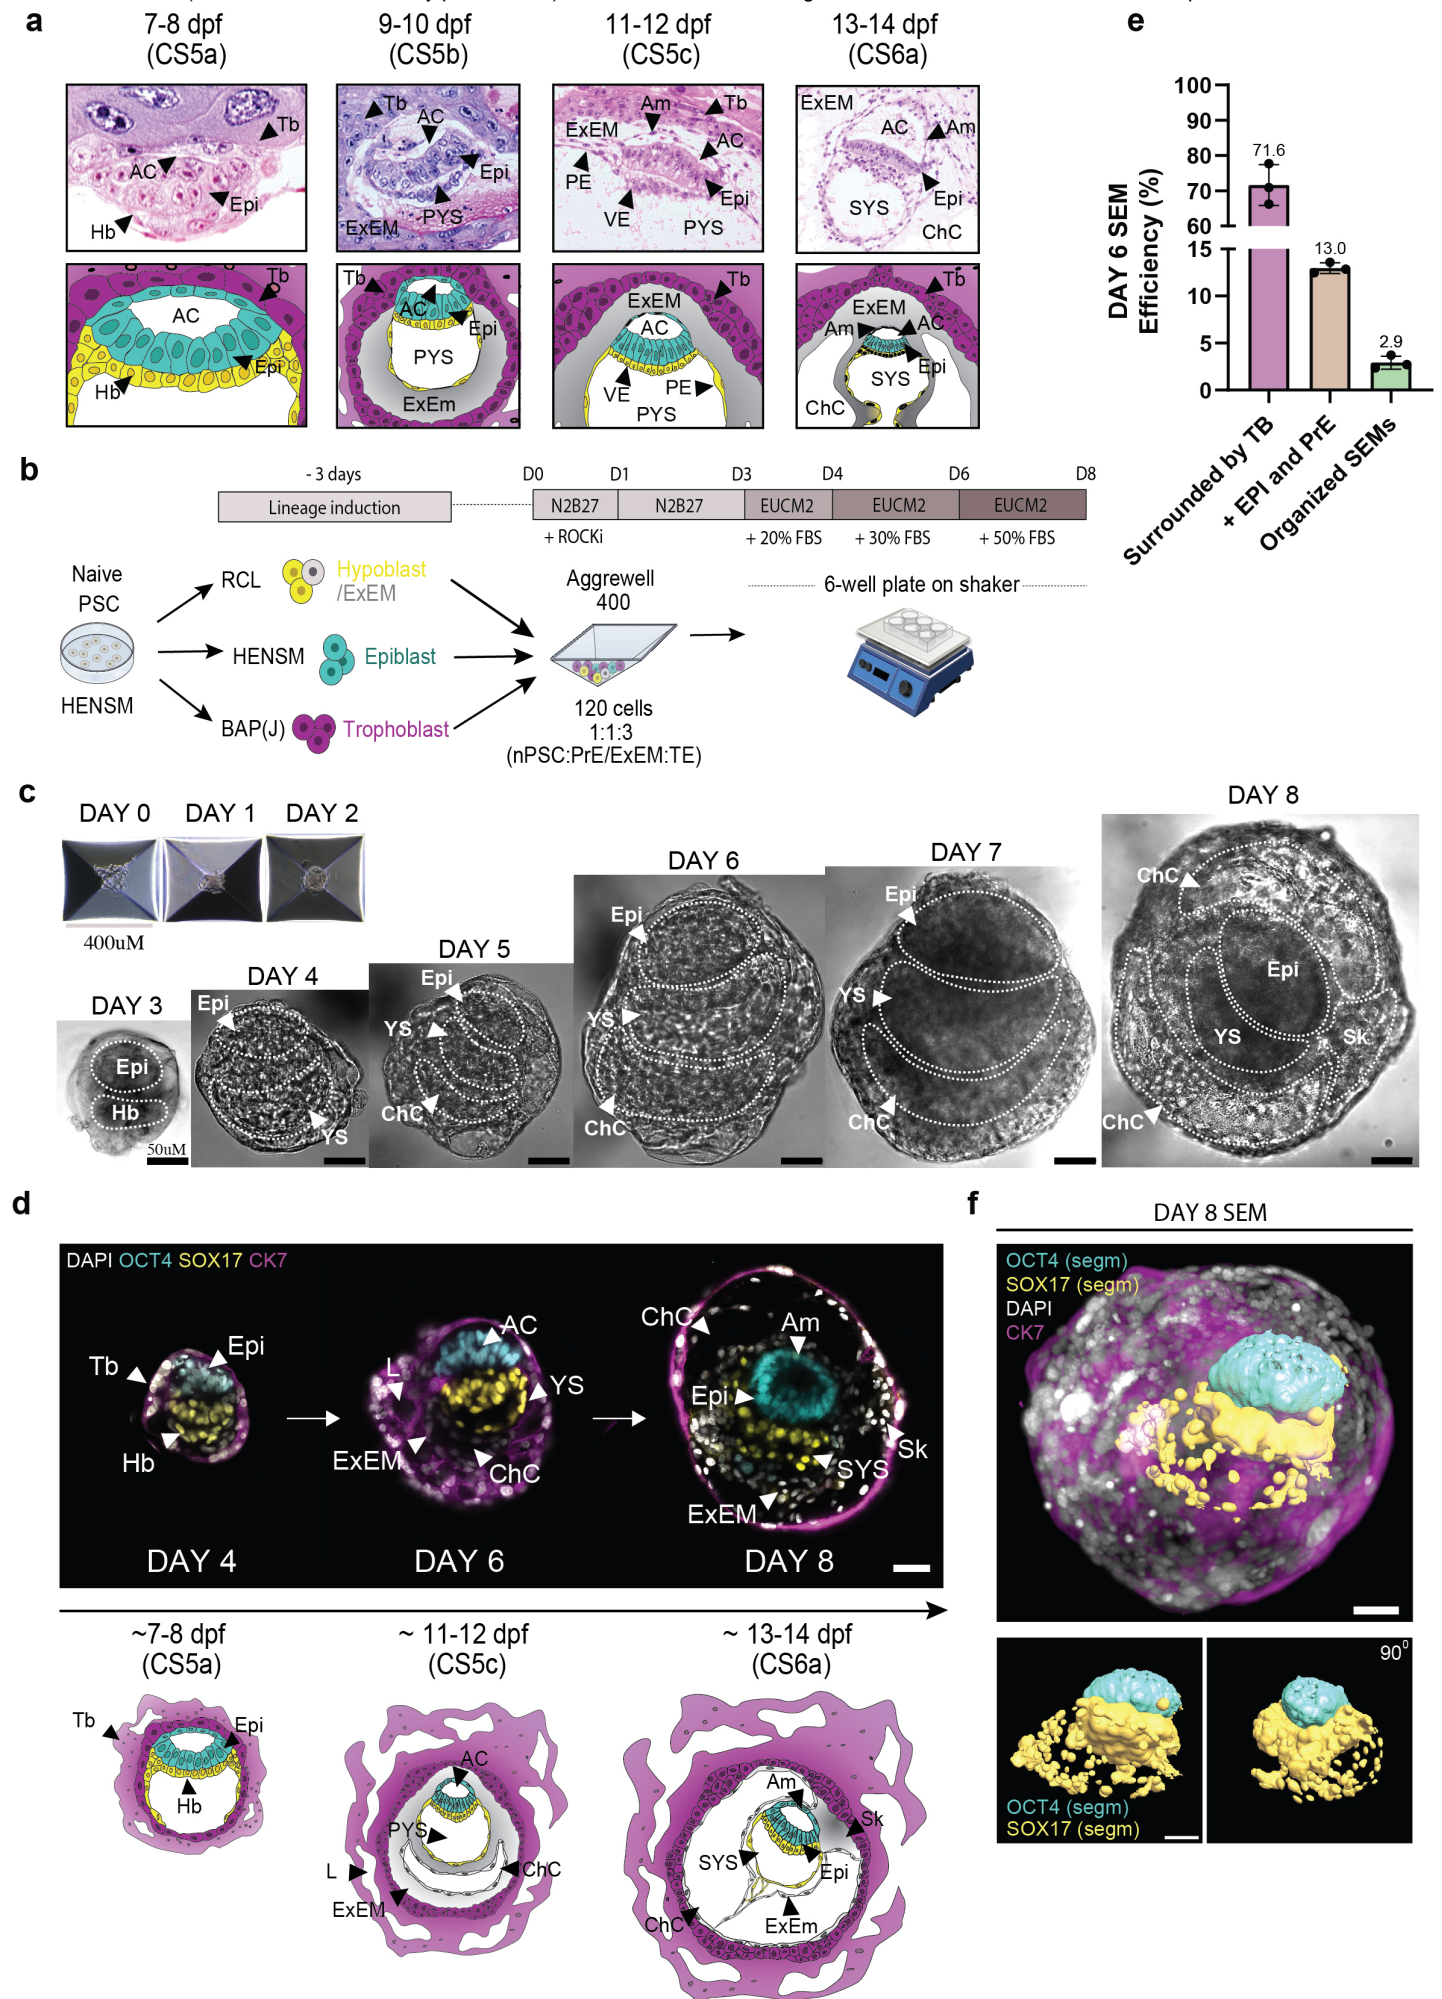



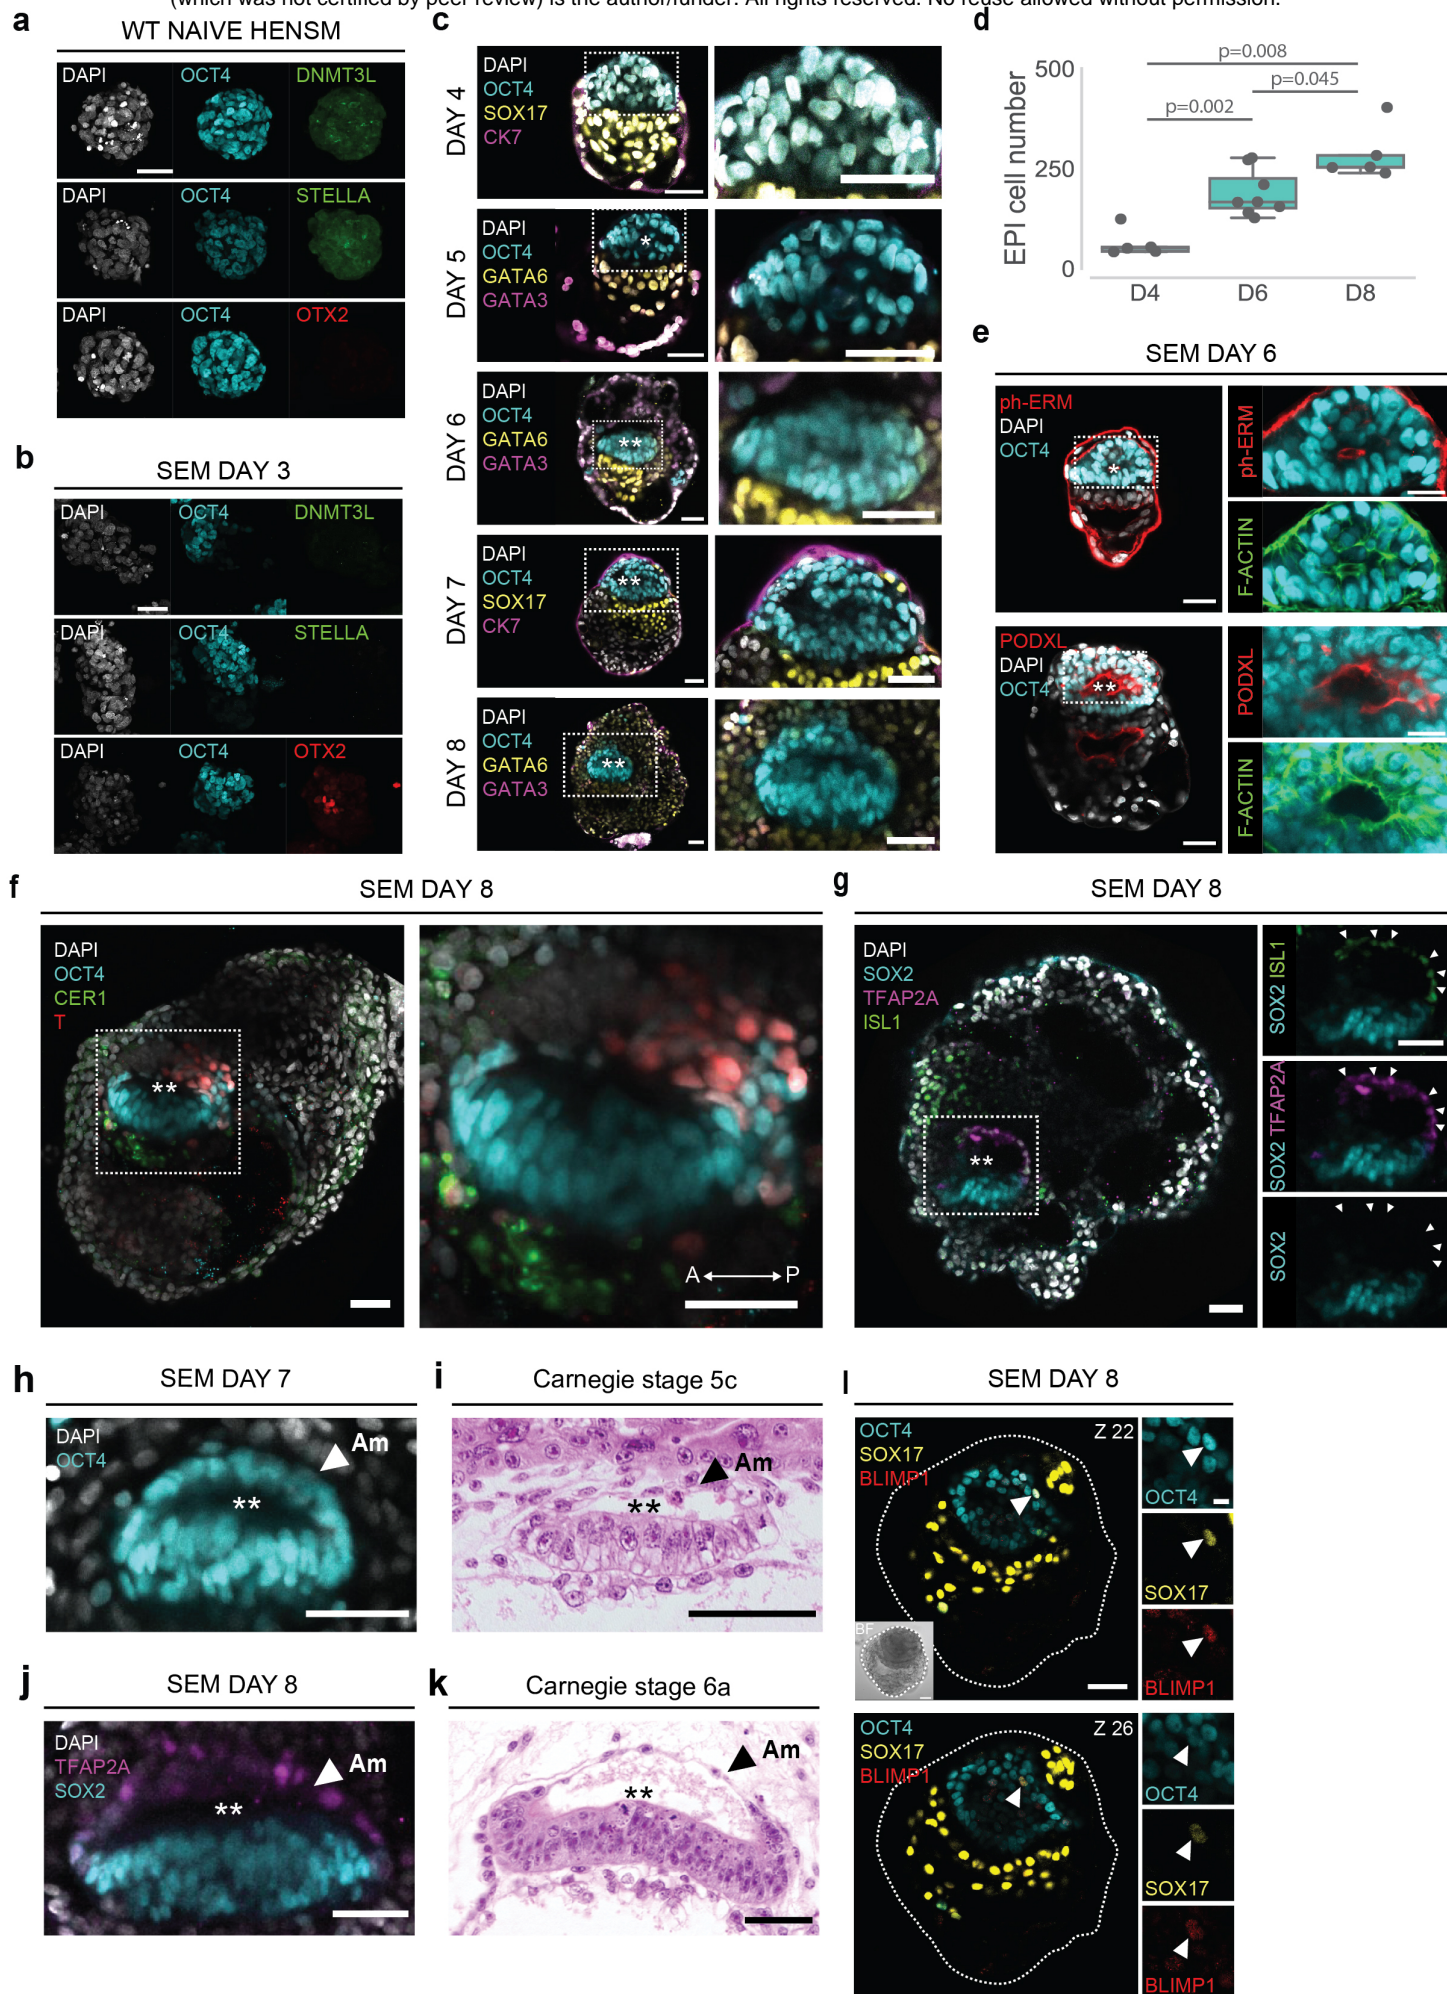



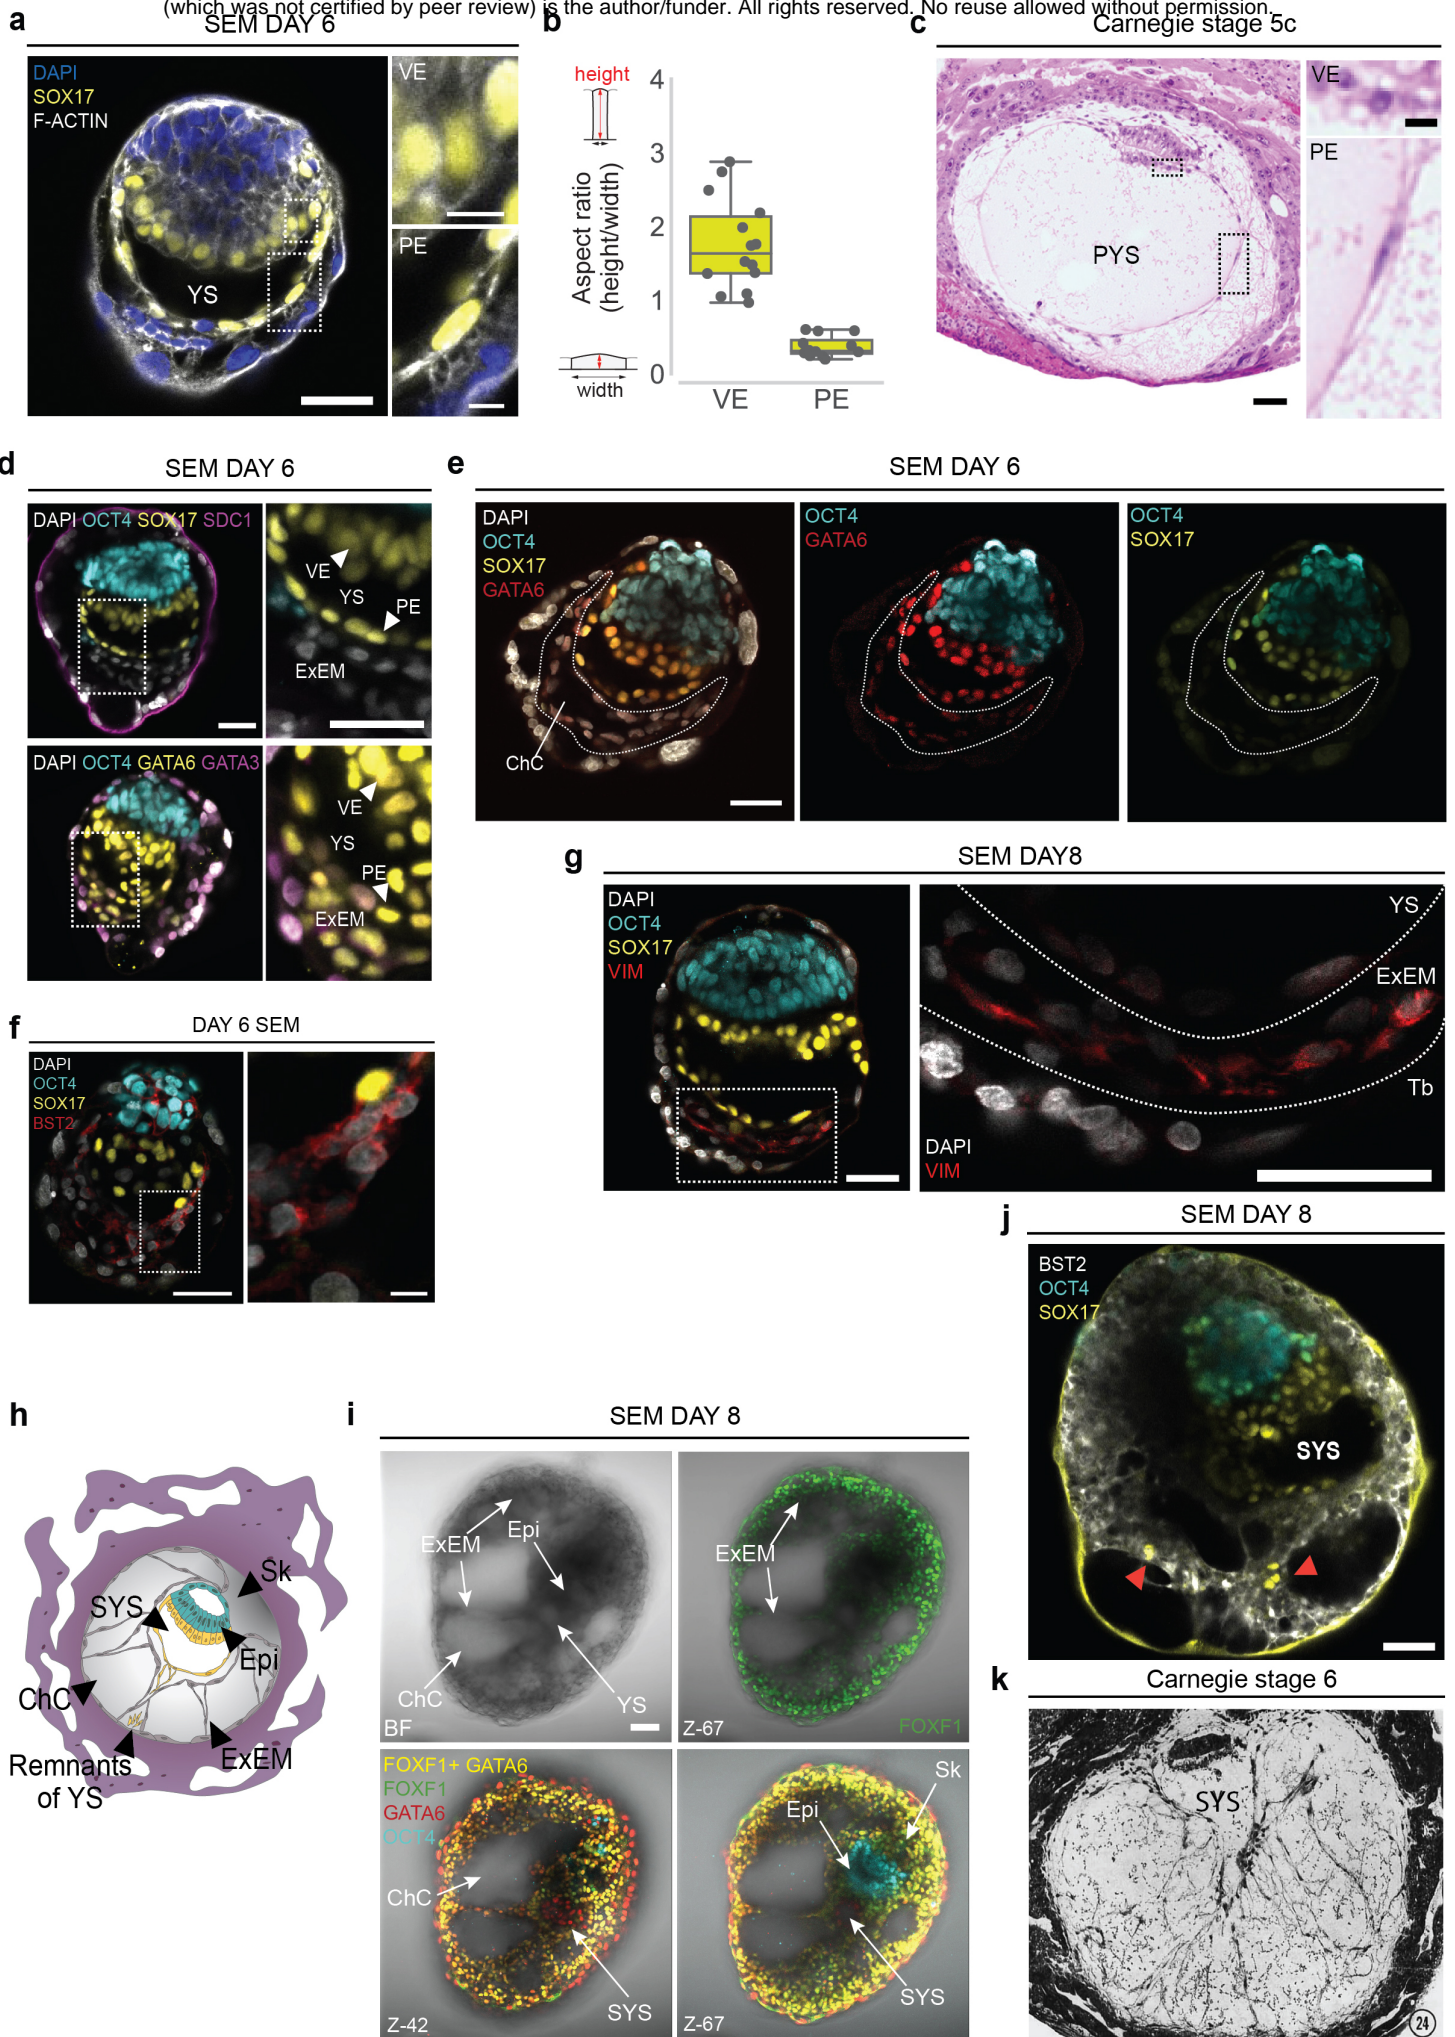



**a**

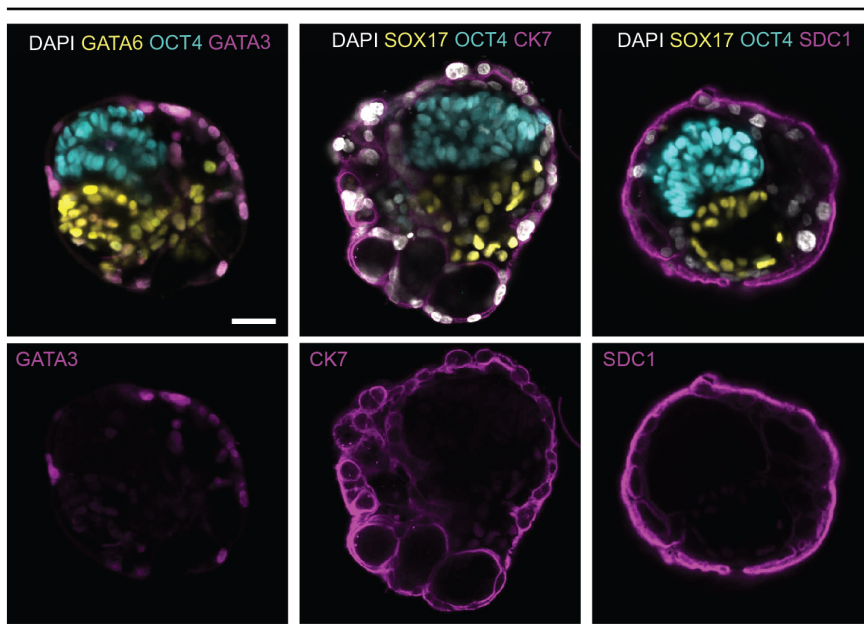

**b**

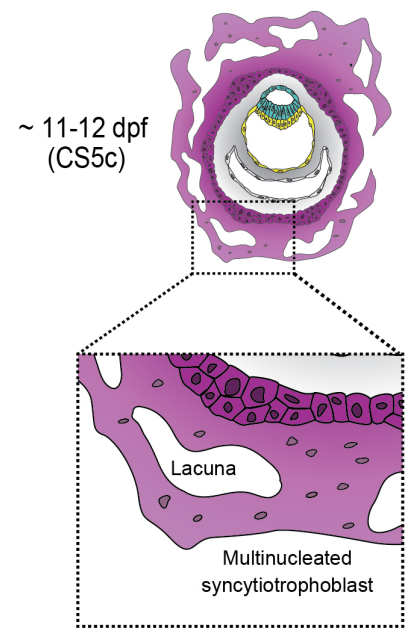

**c**

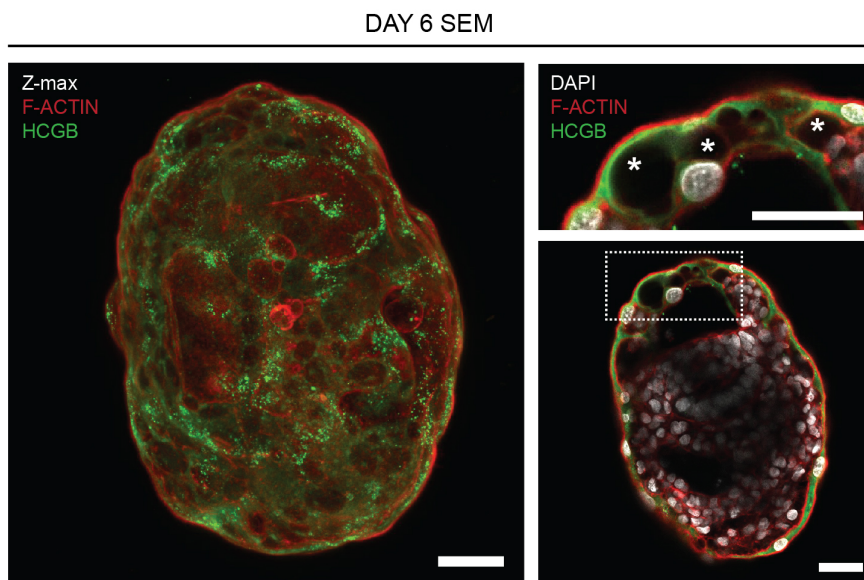

**d**

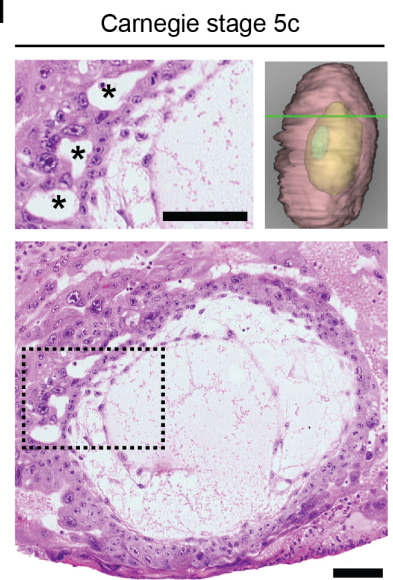

**e**

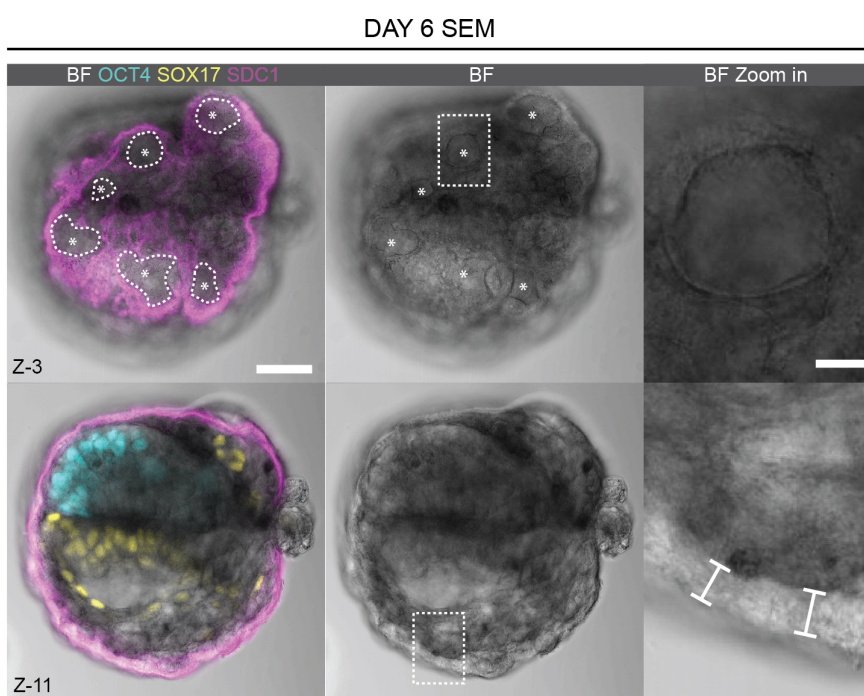

**f**

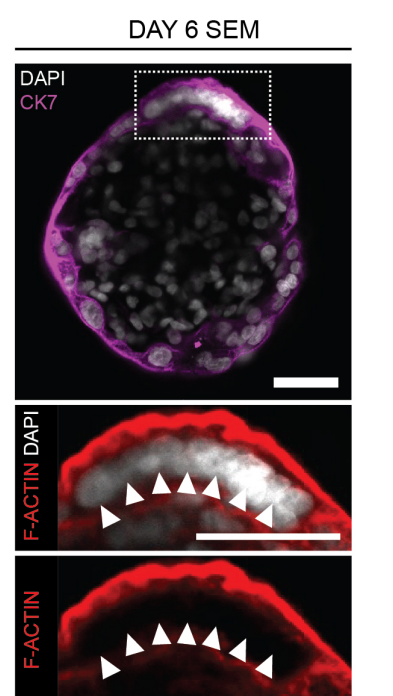

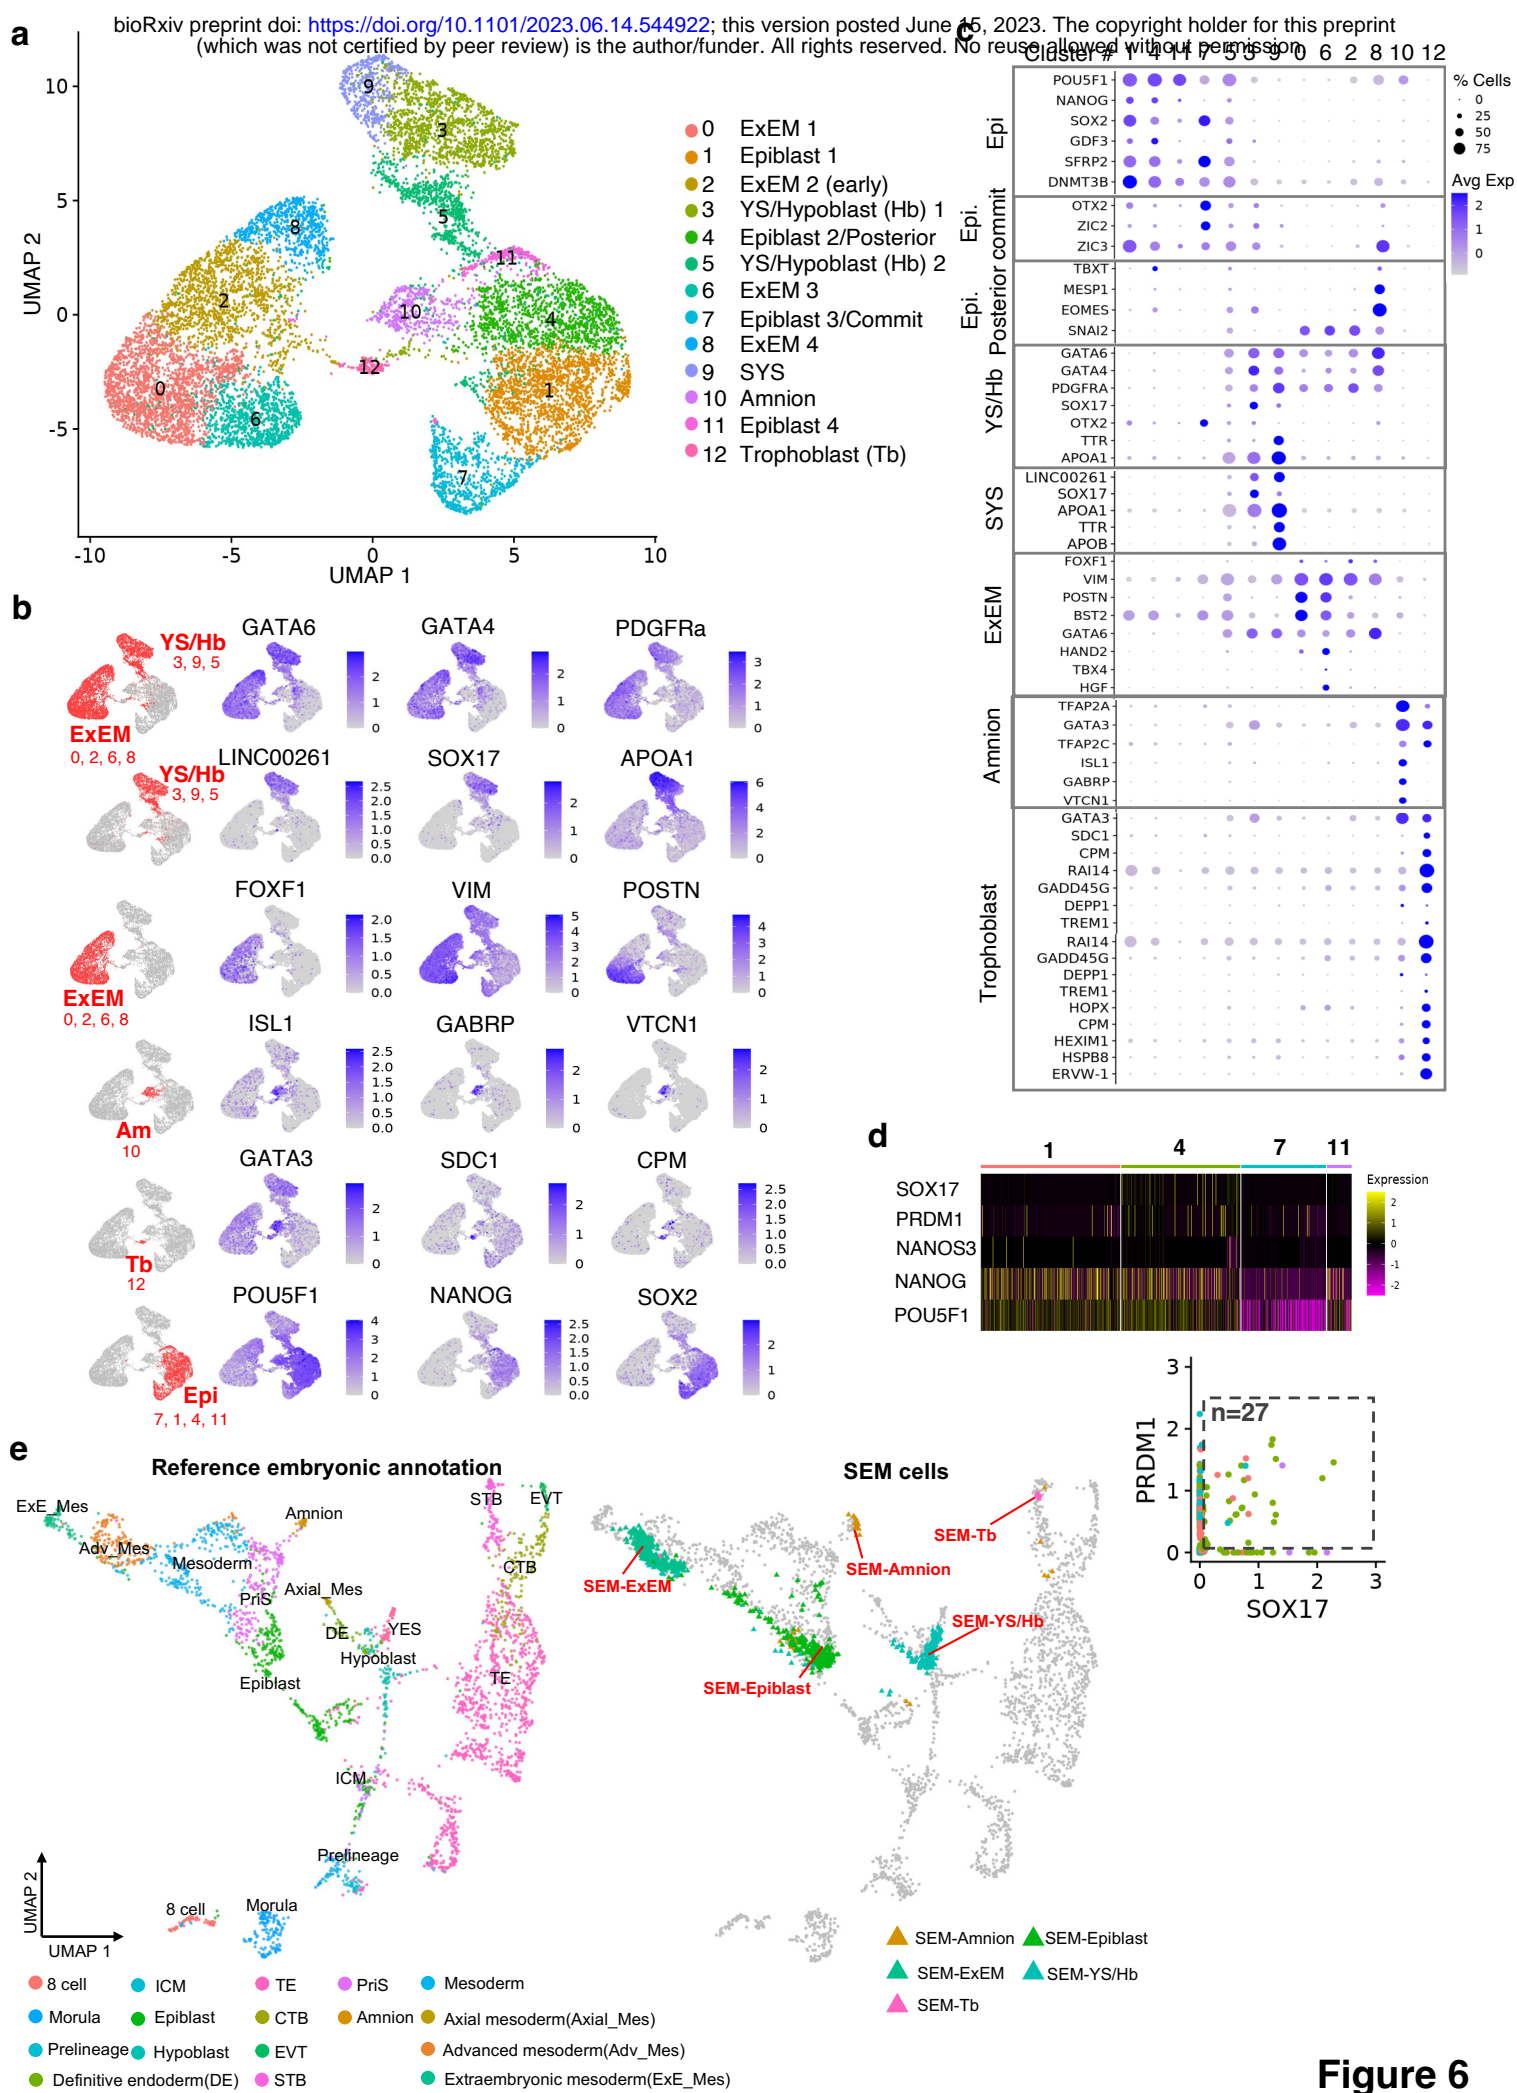

**Figure 6**



# Extended Data Figure 1

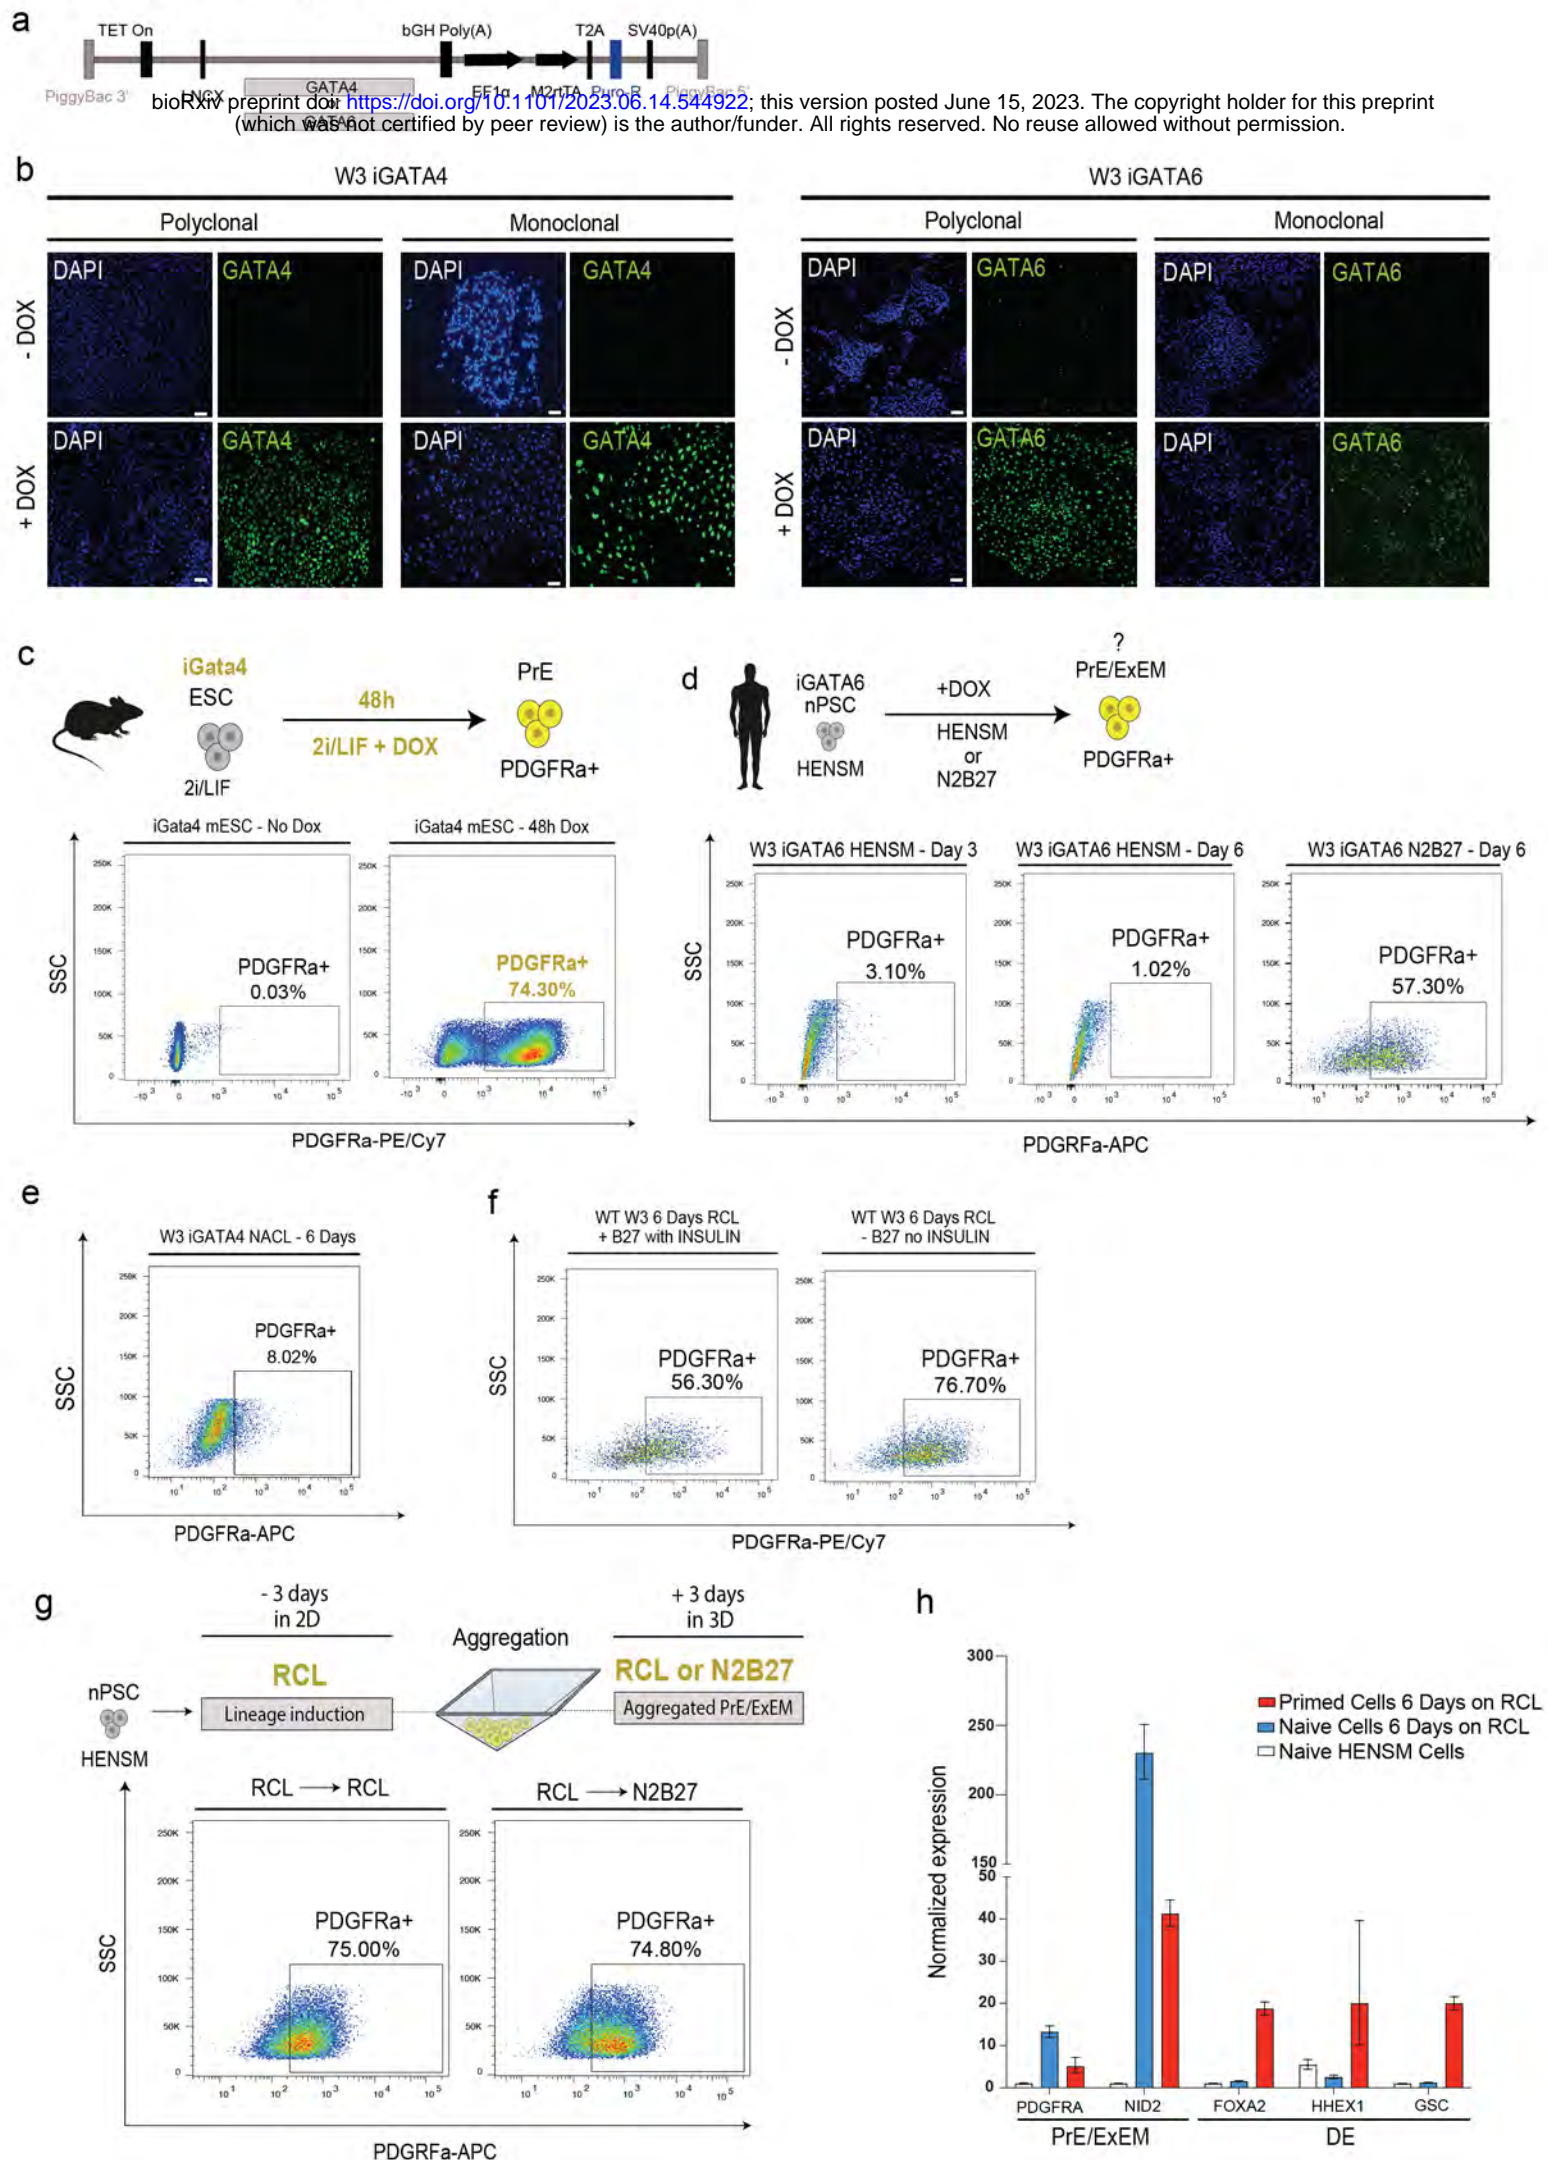



Extended Data Figure 2

a 3 DAYS RCL

b 6 DAYS RCL

W3 WT W3 iGATA6 - DOX W3 iGATA6 + DOX W3 WT W3 iGATA6 - DOX W3 iGATA6 + DOX

bioRxiv preprint doi: <https://doi.org/10.1101/2023.06.14.544922>; this version posted June 15, 2023. The copyright holder for this preprint (which was not certified by peer review) is the author/funder. All rights reserved. No reuse allowed without permission.

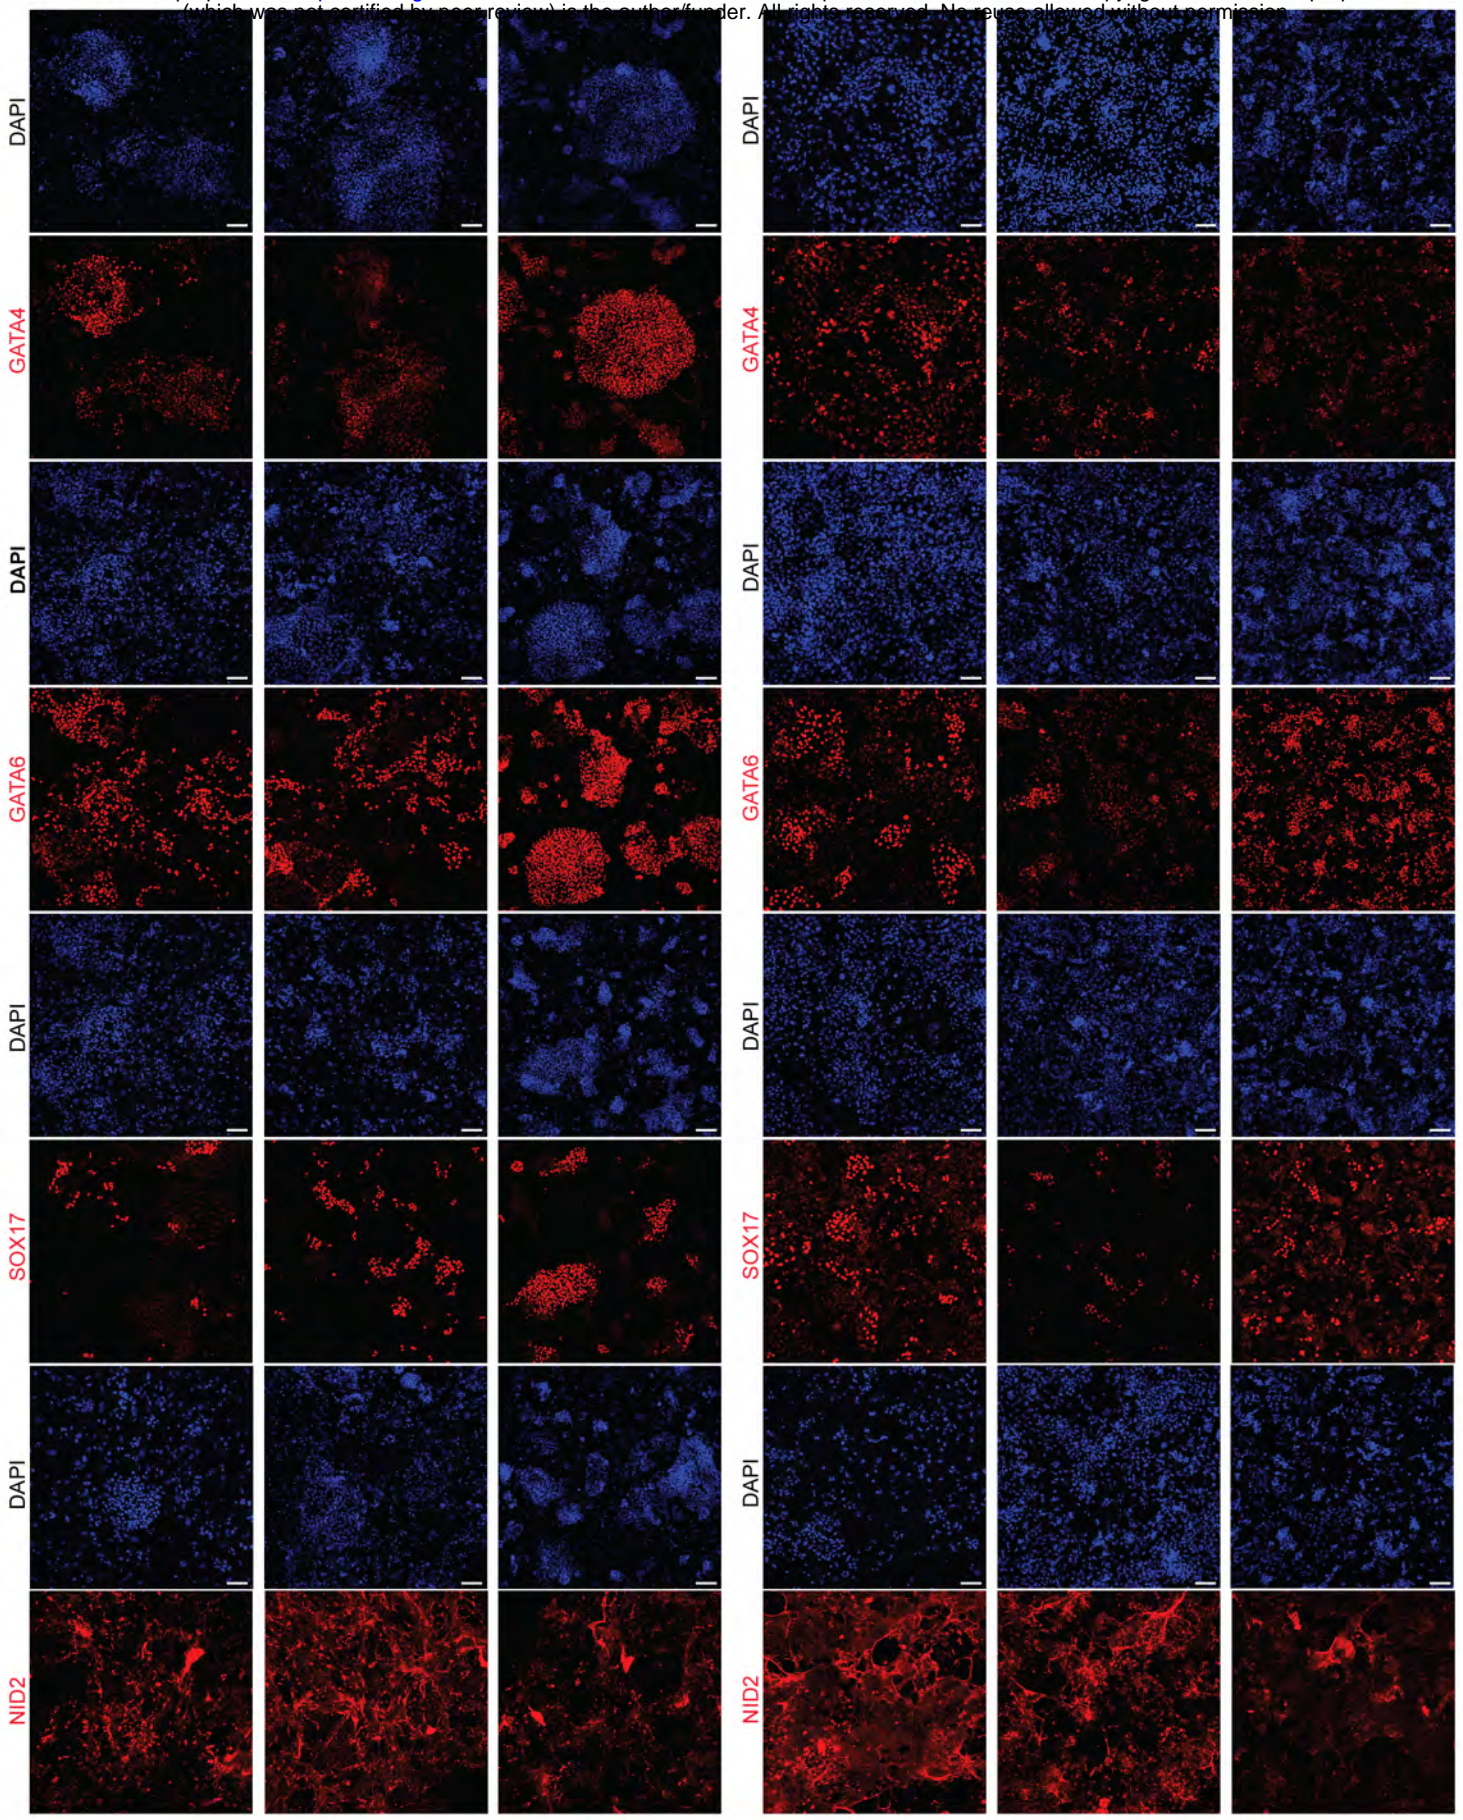



Extended Data Figure 3

a

bioRxiv preprint doi: <https://doi.org/10.1101/2023.06.14.544922>; this version posted June 14, 2023. The copyright holder for this preprint (which was not certified by peer review) is the author/funder. All rights reserved. No reuse allowed without permission.

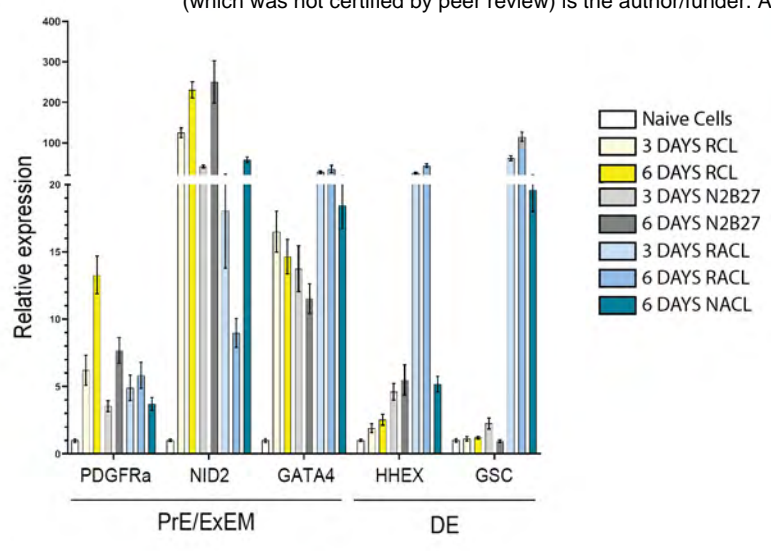

c

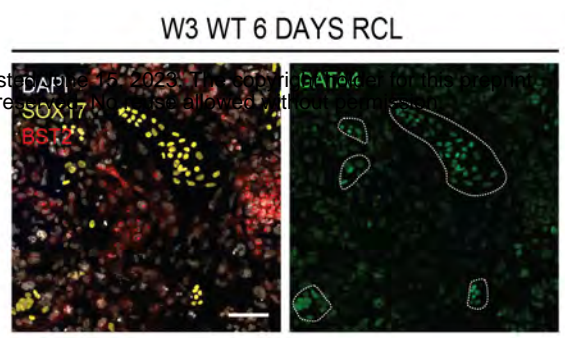

b

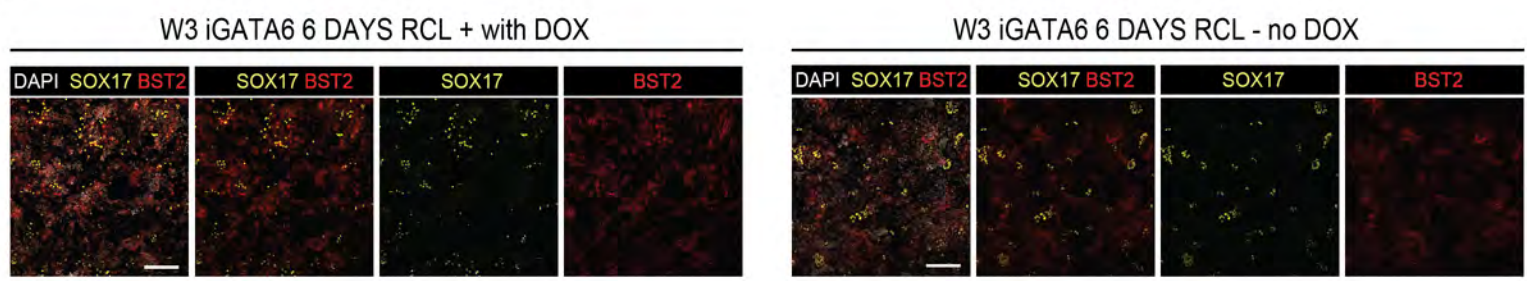

d

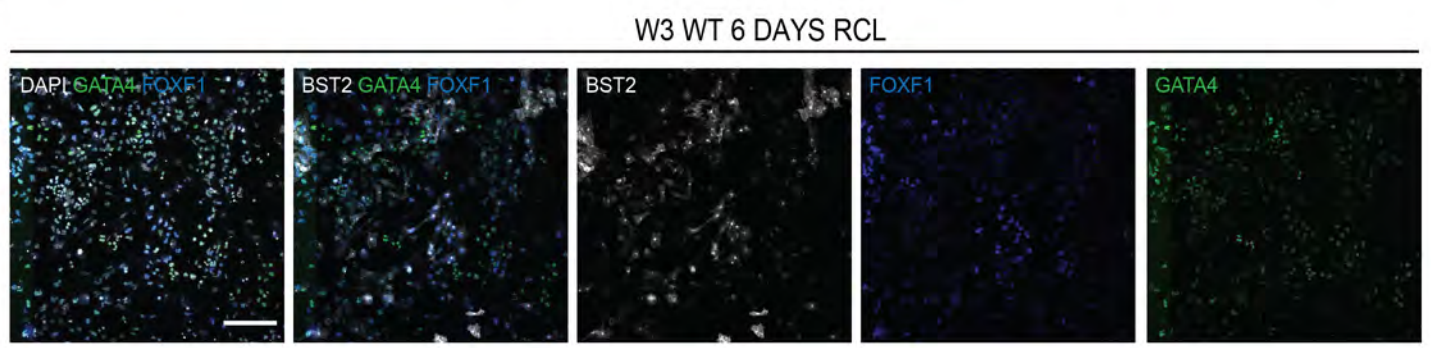



bioRxiv preprint doi: <https://doi.org/10.1101/2023.06.14.544922>; this version posted June 15, 2023. The copyright holder for this preprint (which was not certified by peer review) is the author/funder. All rights reserved. No reuse allowed without permission.

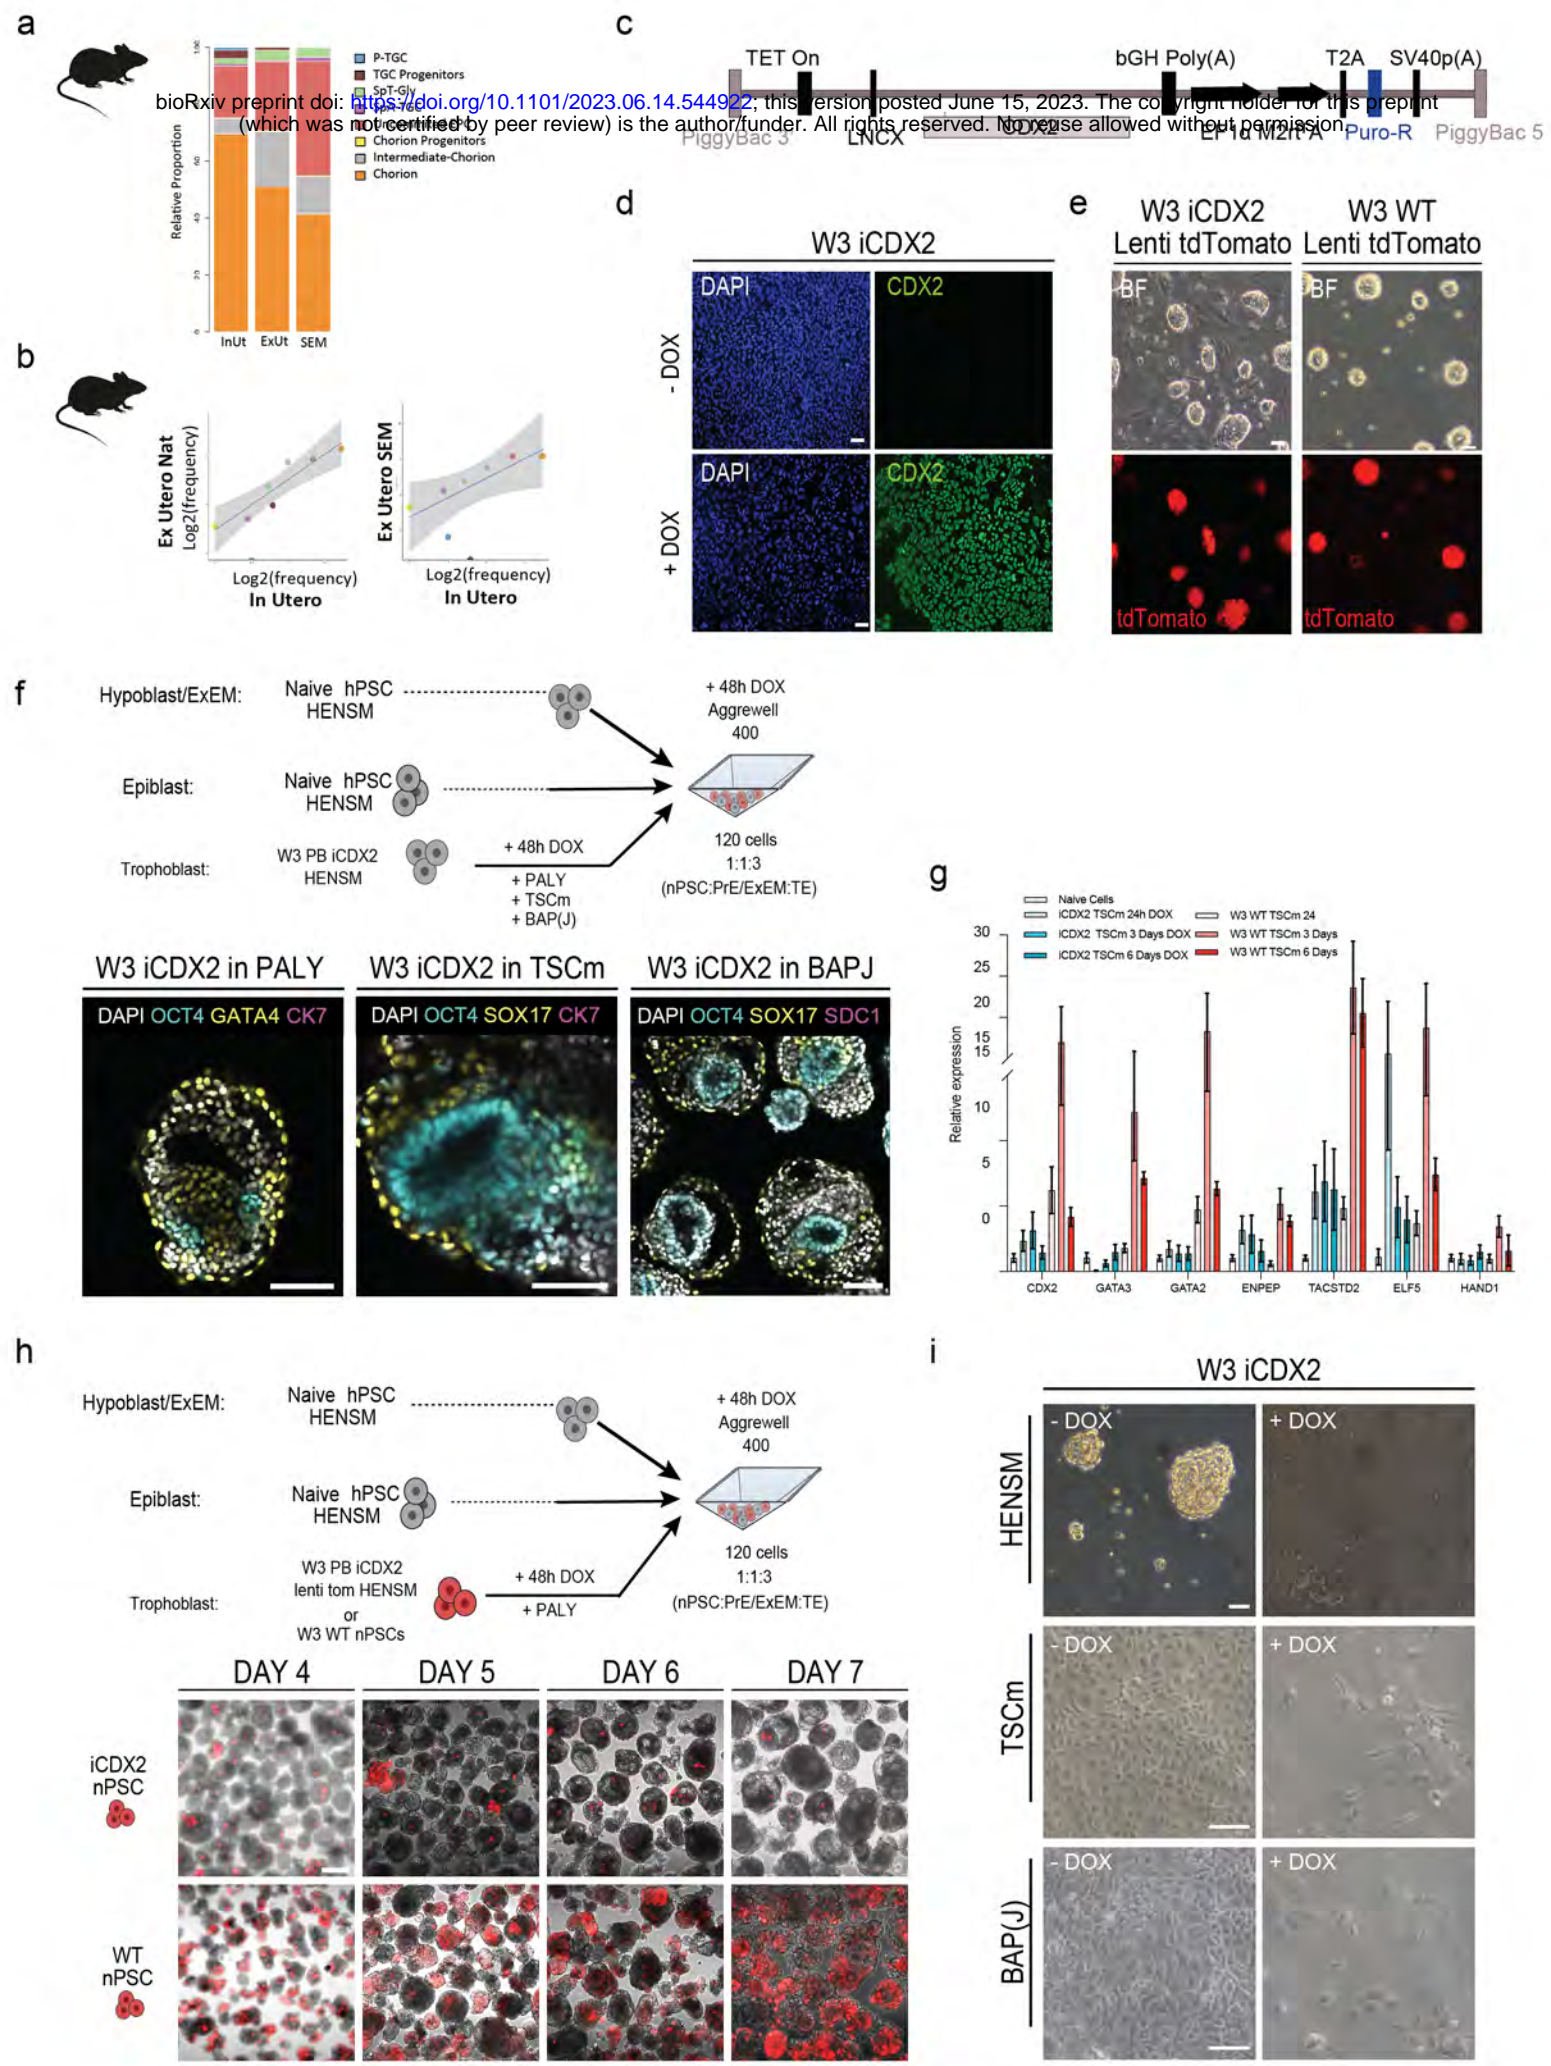



# Extended Data Figure 5

**a**

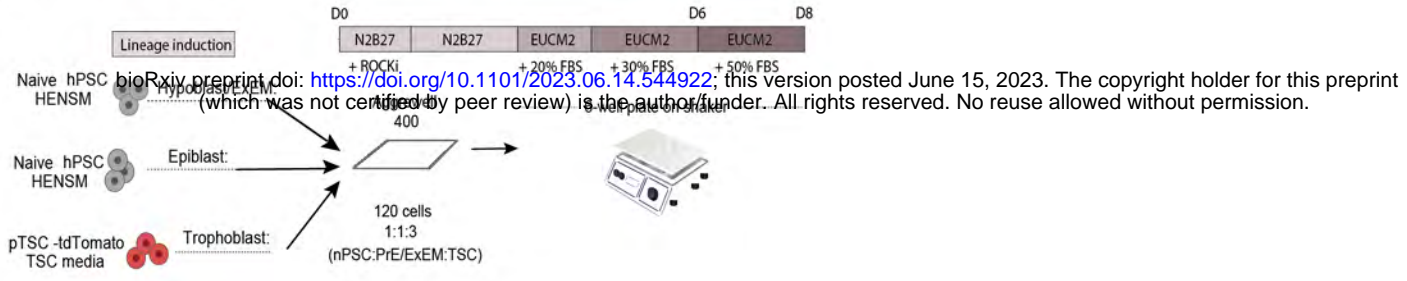

**b**

DAY 7

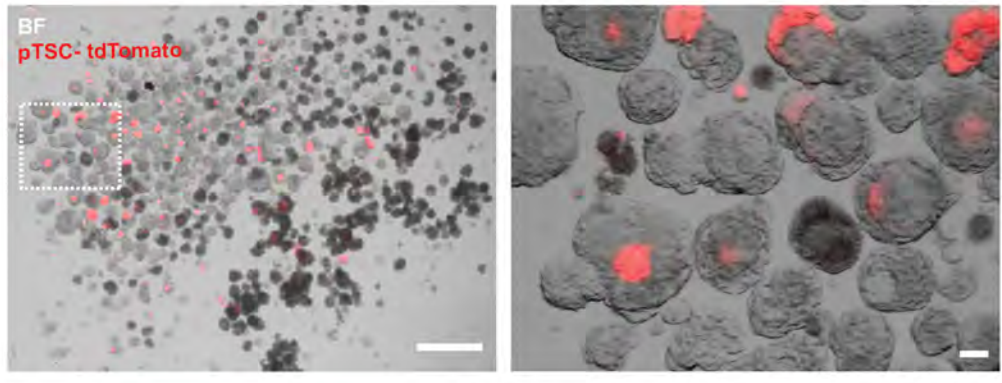

**c**

DAY 8

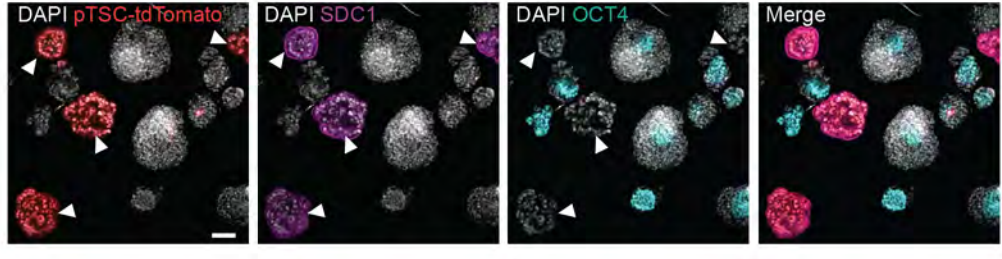

**d**

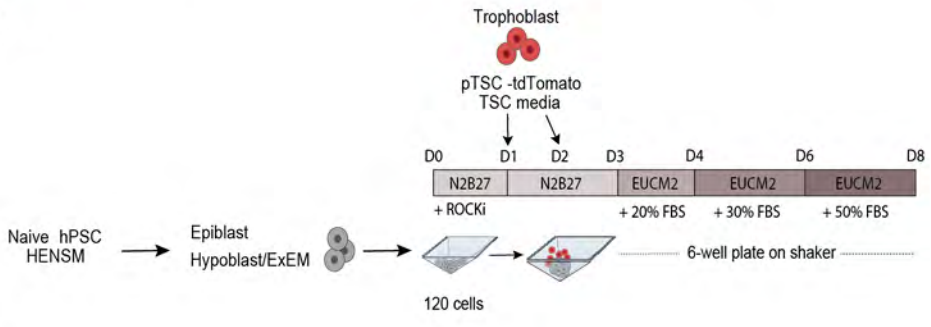

**e**

DAY 5

DAY 8

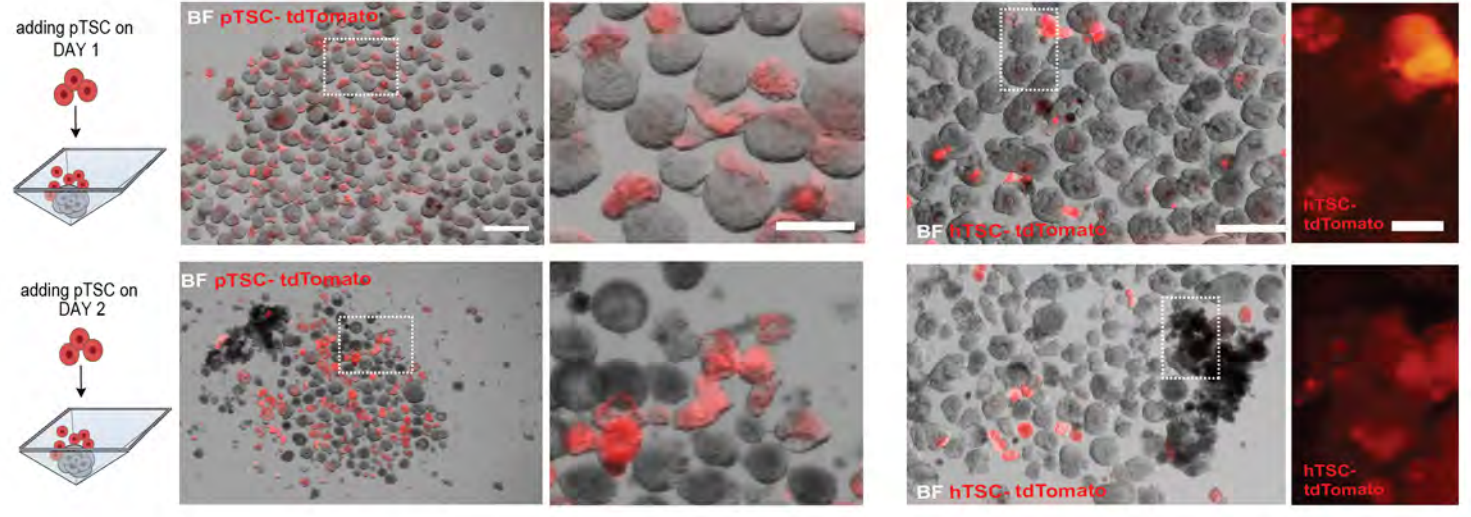



# Extended Data Figure 6

## W3 nTSC line

**a**

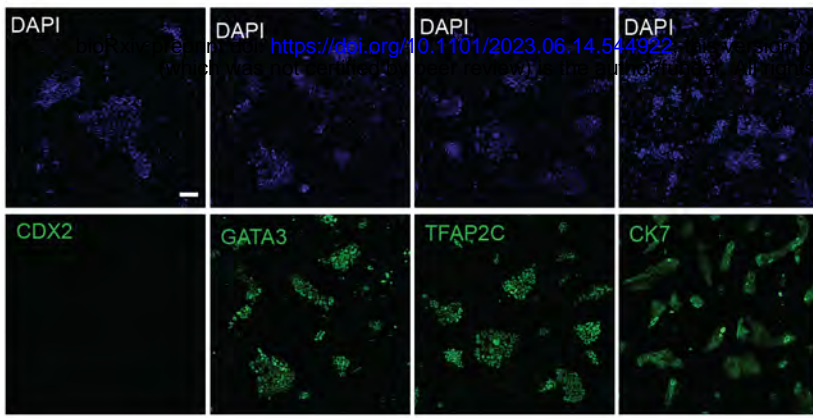

posted June 15, 2023. The copyright holder for this preprint reserved. No reuse allowed without permission.

**b**

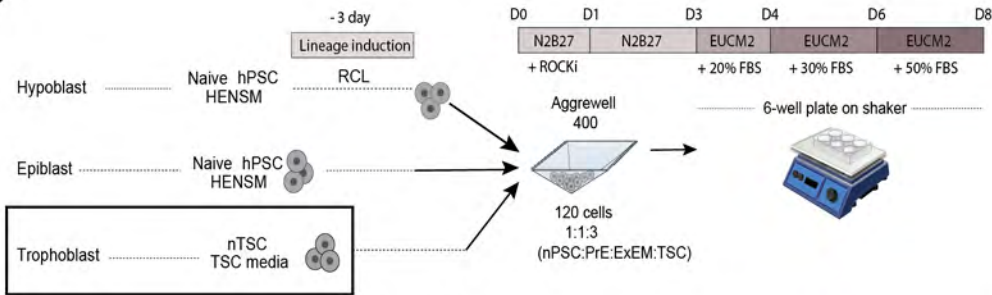

**c**

### SEM DAY 6

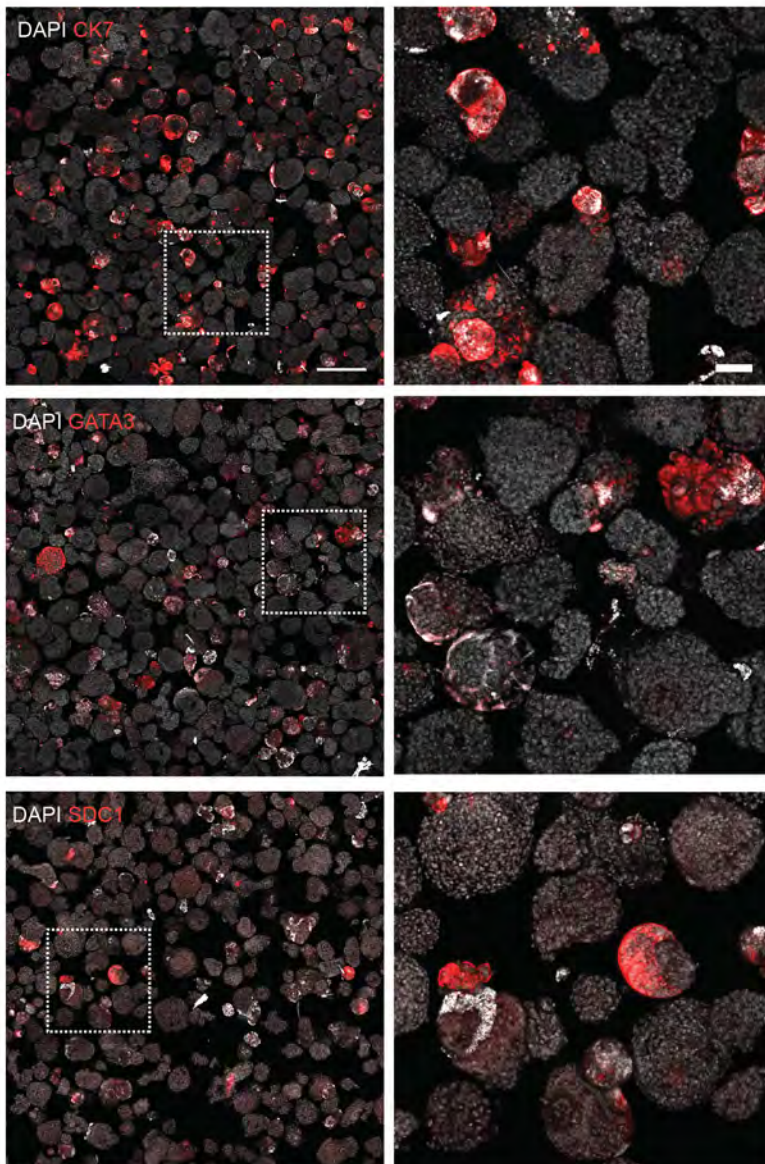

**d**

### SEM DAY 6

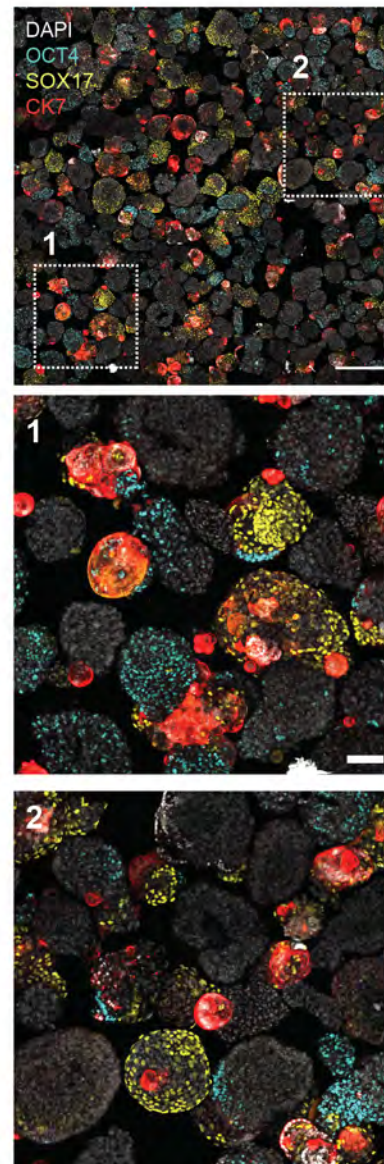



# Extended Data Figure 7

**a**

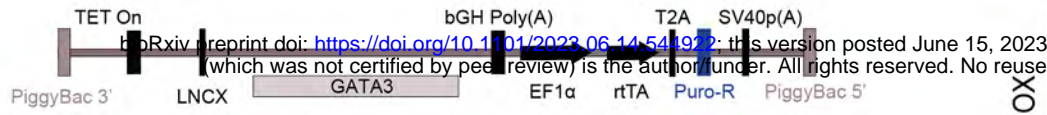

**c**

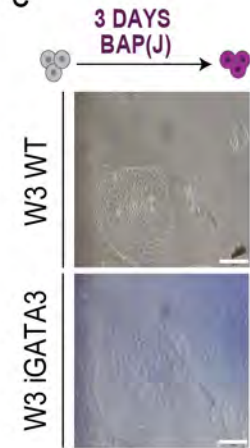

**d**

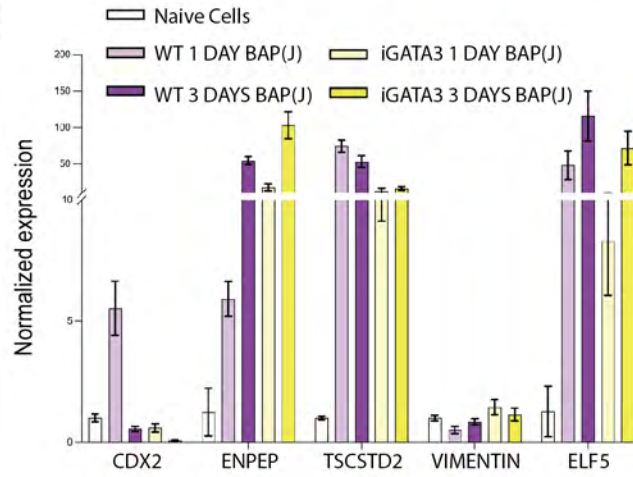

**b**

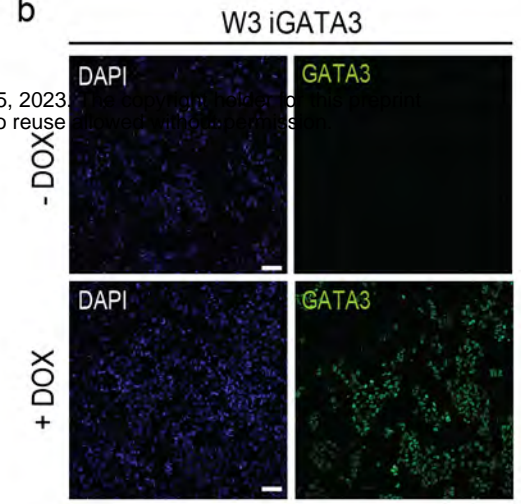

**e**

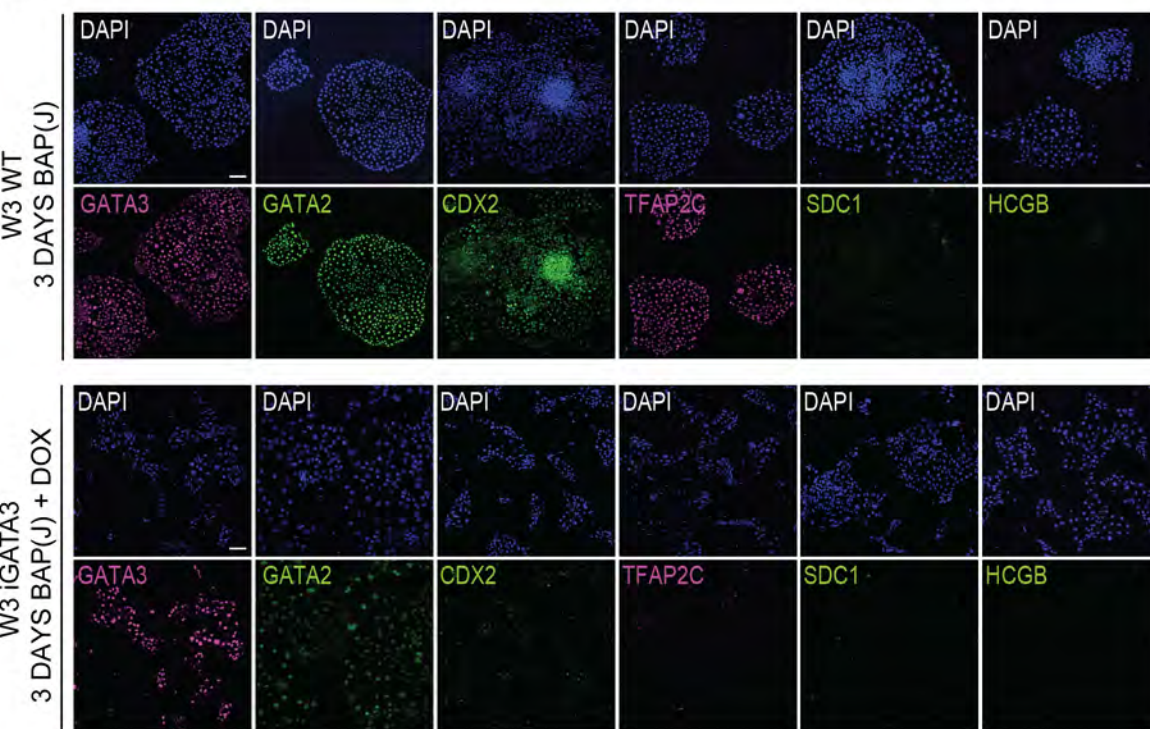

**f**

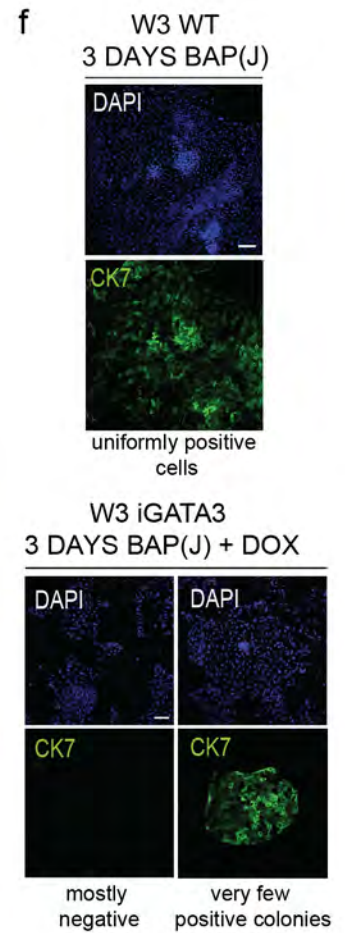

**g**

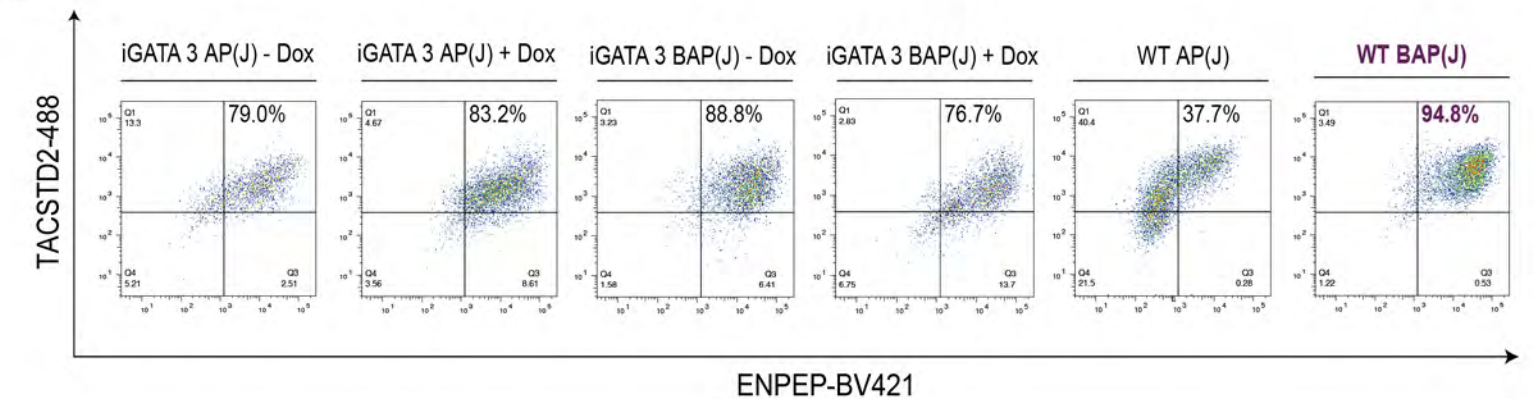

# Extended Data Figure 8

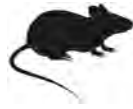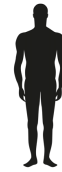

## Gata6

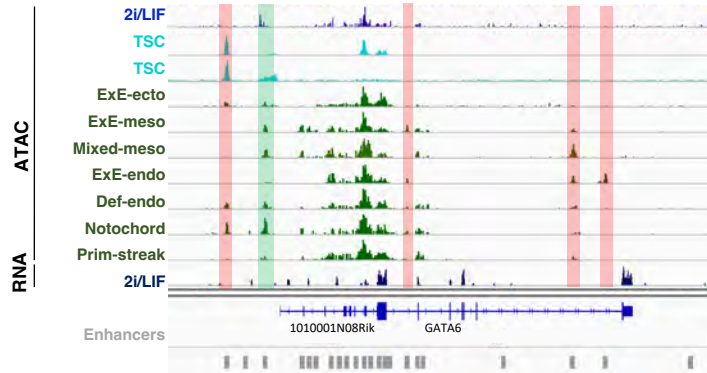

## GATA6

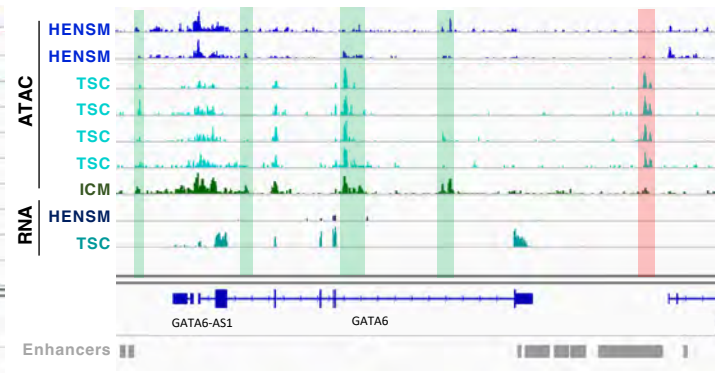

## Gata3

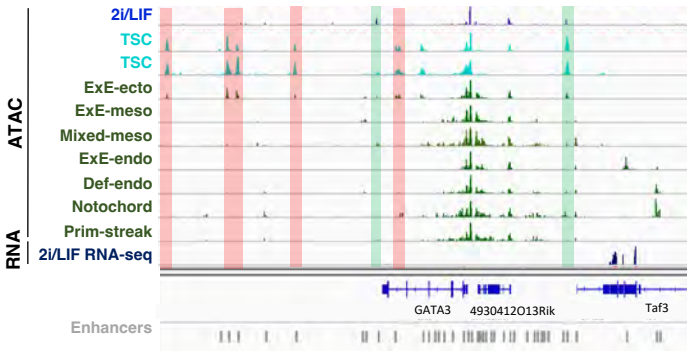

## GATA3

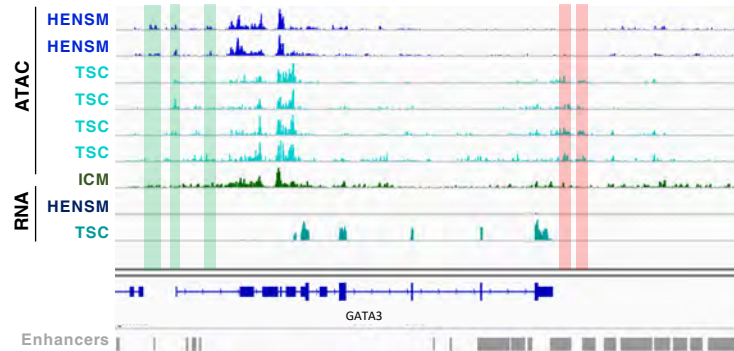

## Gata4

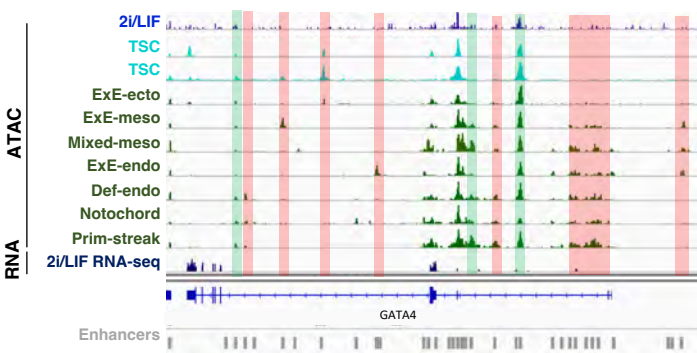

## GATA4

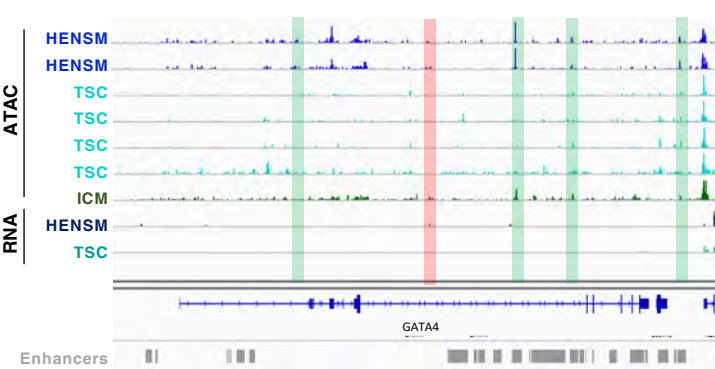



# Extended Data Figure 9

**a**

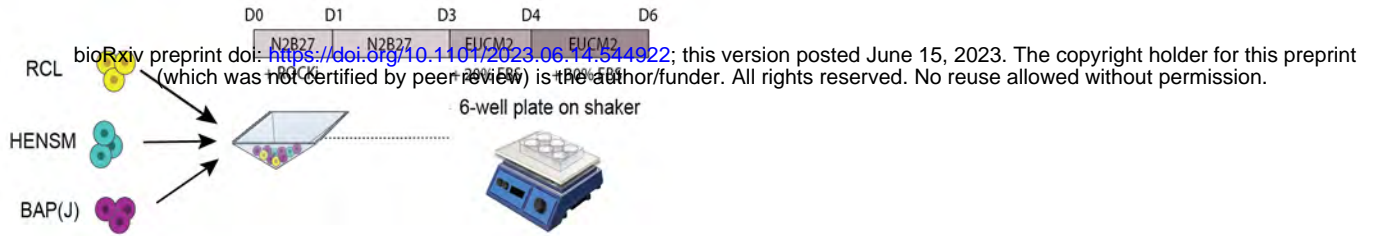

**b**

60 cells

1:1:3 (nPSC:PrE/ExEM:TE) SEM DAY6

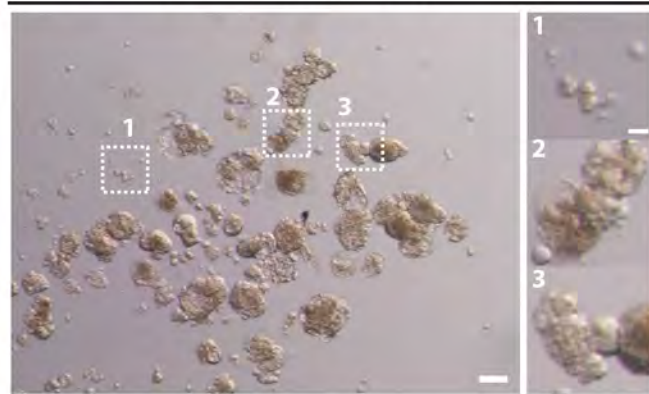

120 cells

1:1:3 (nPSC:PrE/ExEM:TE) SEM DAY6

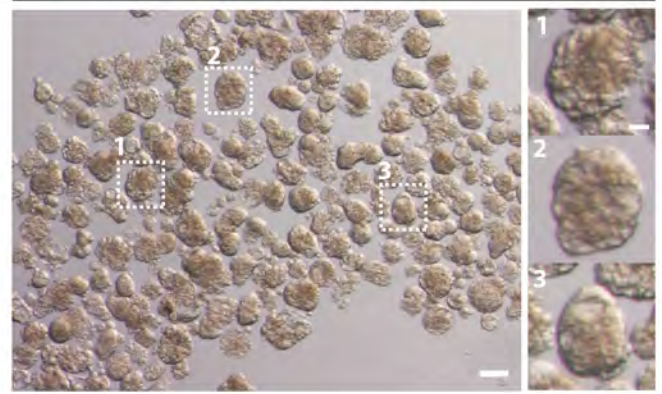

**c**

132 cells

4:2:7 (nPSC:PrE/ExEM:TE) SEM DAY6

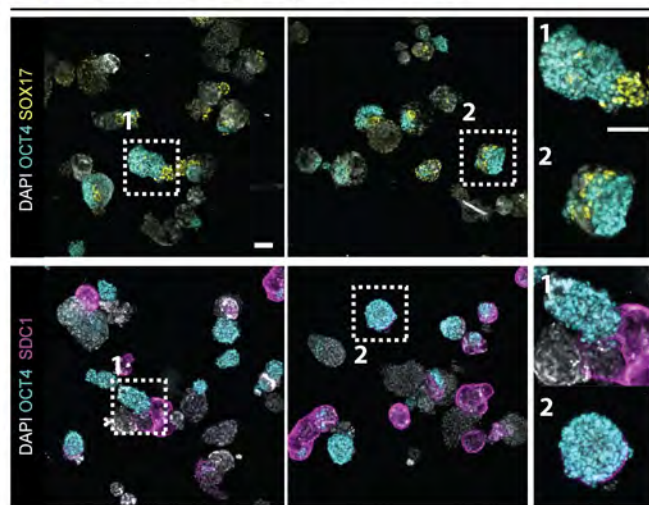

160 cells

2:1:5 (nPSC:PrE/ExEM:TE) SEM DAY6

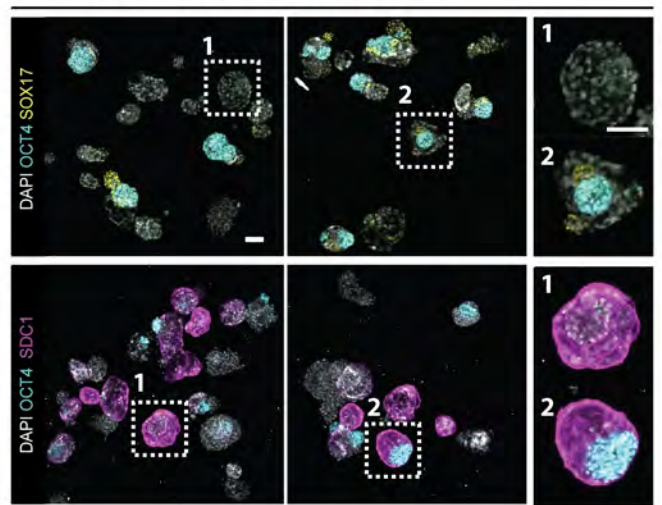

**d**

DAY 6 SEM

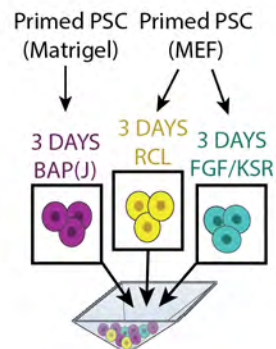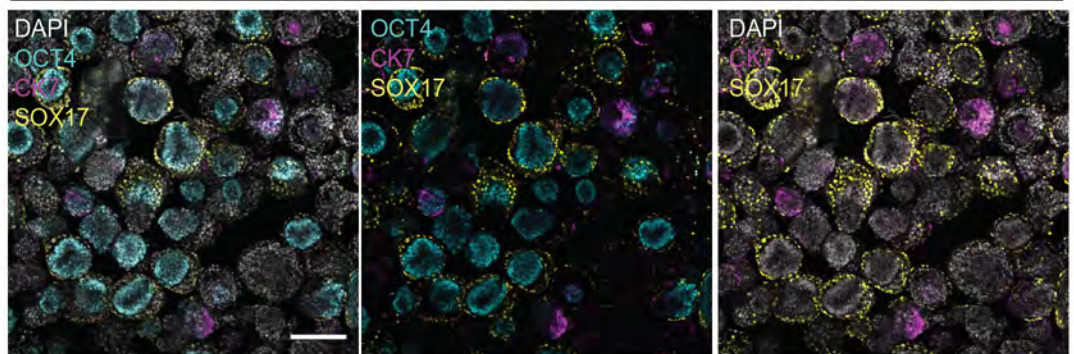



# Extended Data Figure 10

**a**

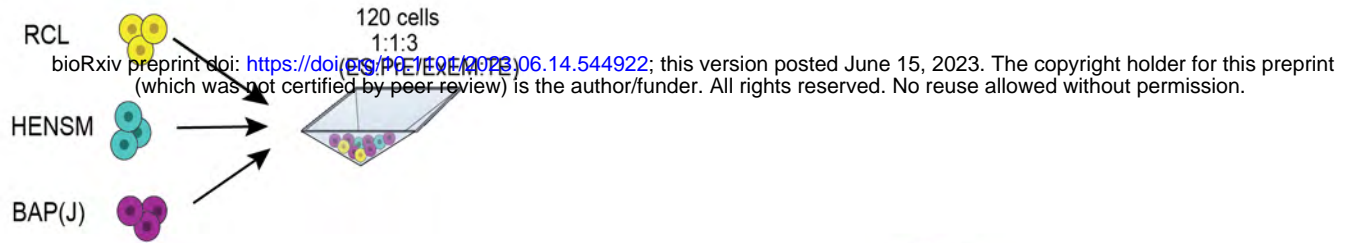

**b**

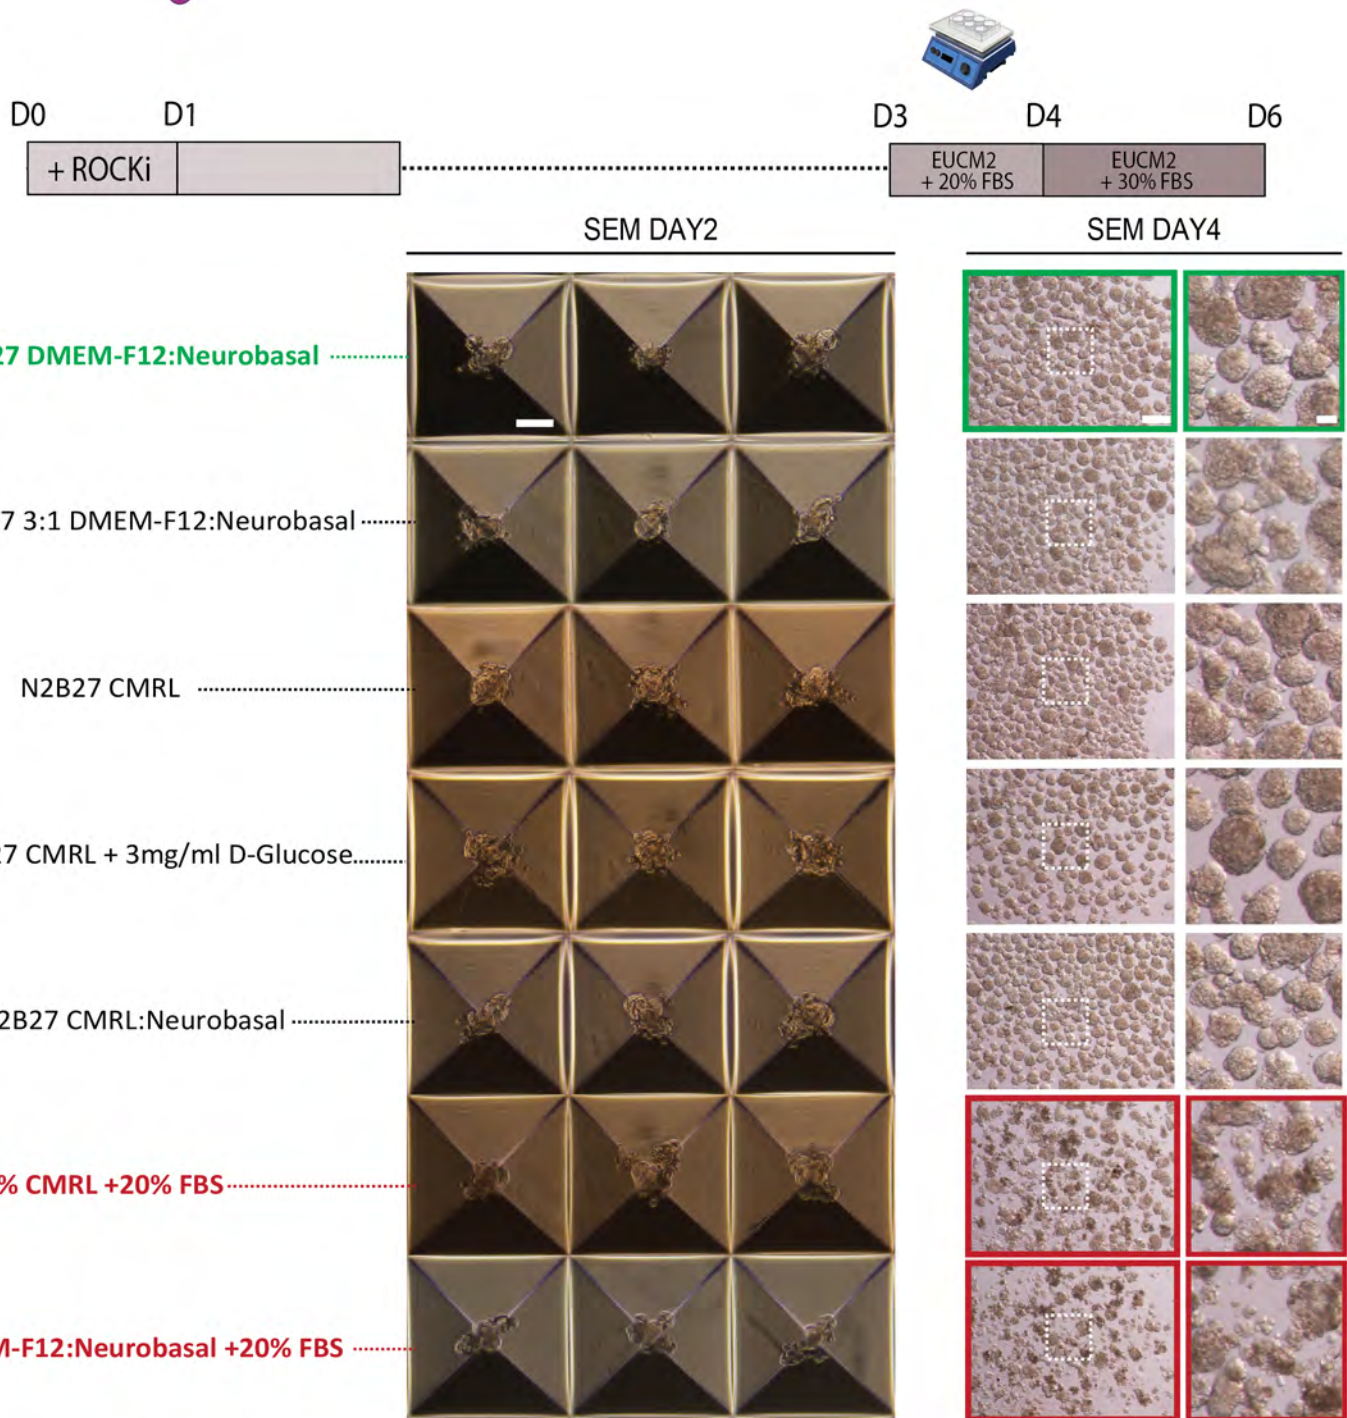

**c**

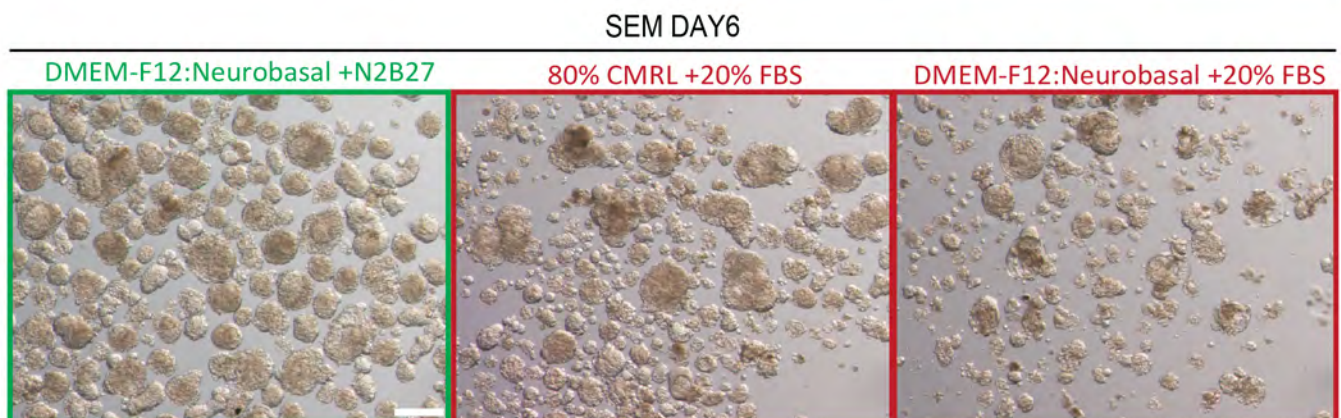



# Extended Data Figure 11

a

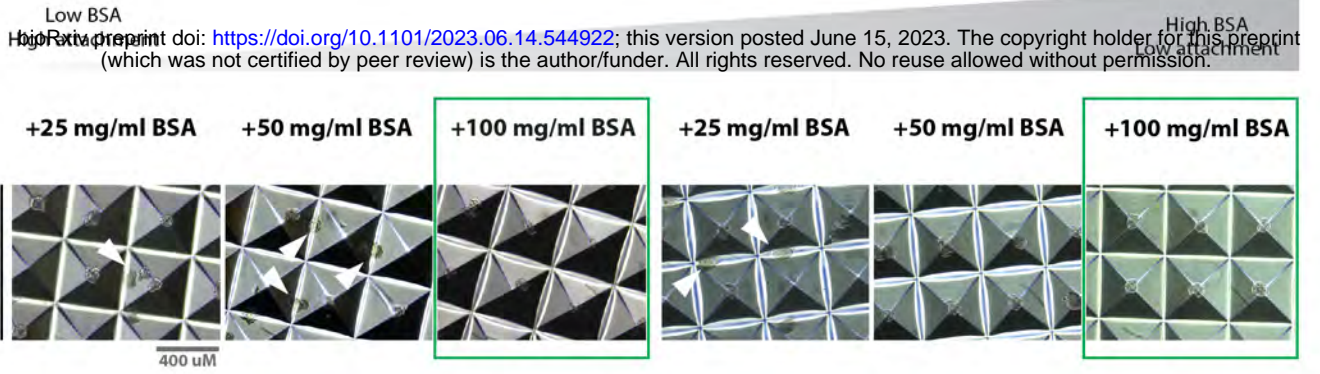

b

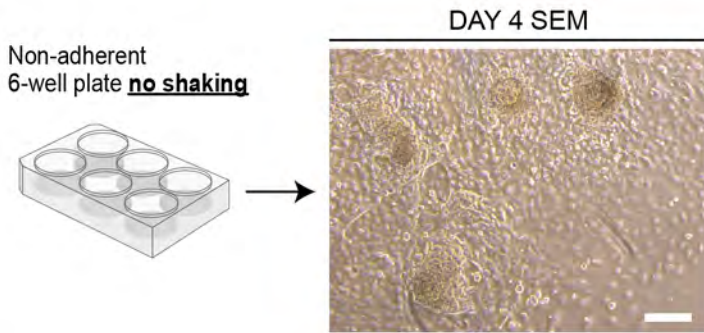

c

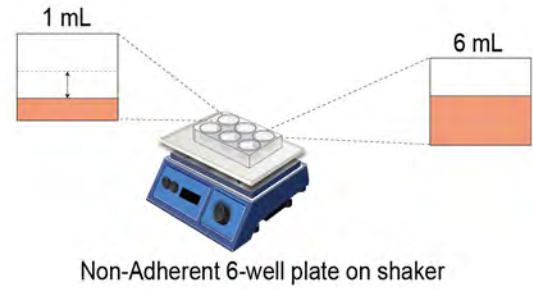

d

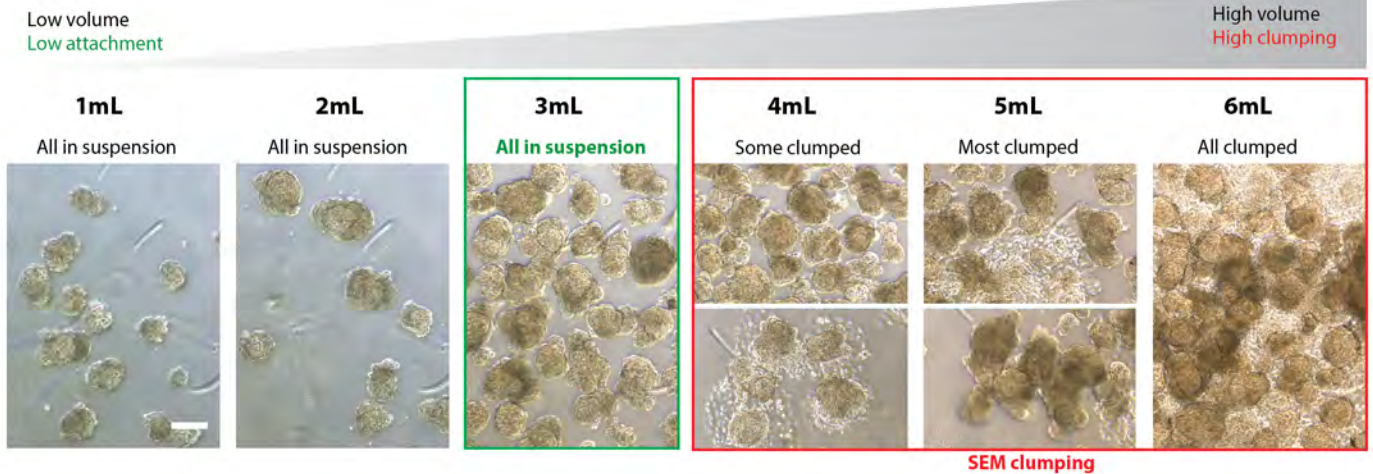

e

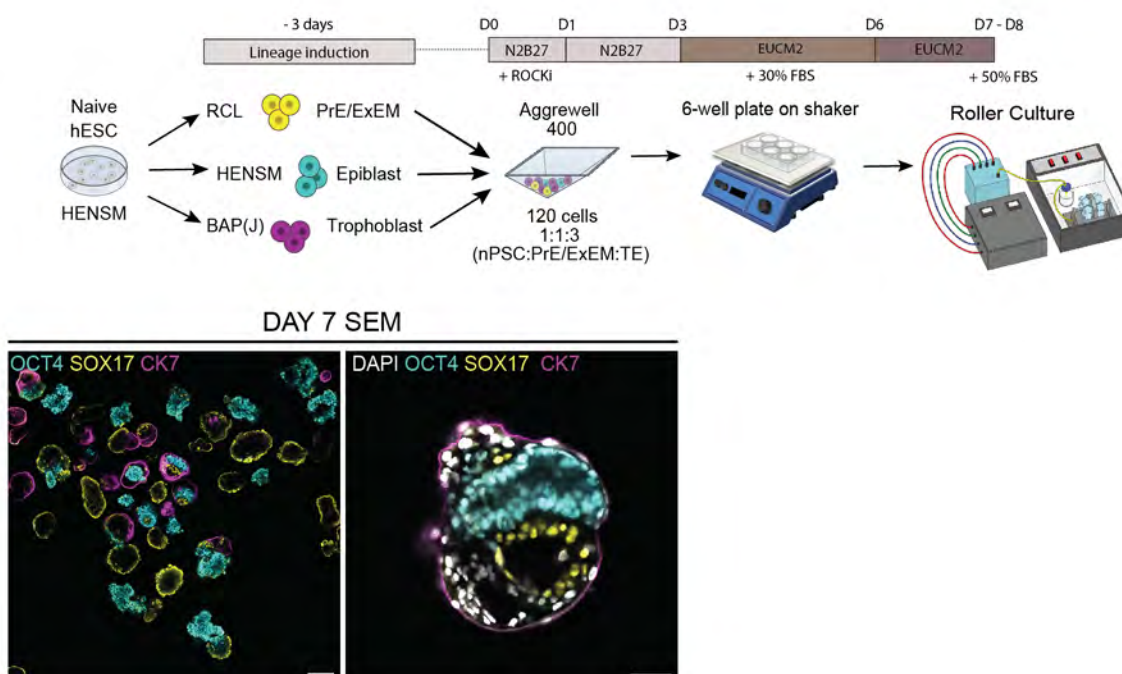



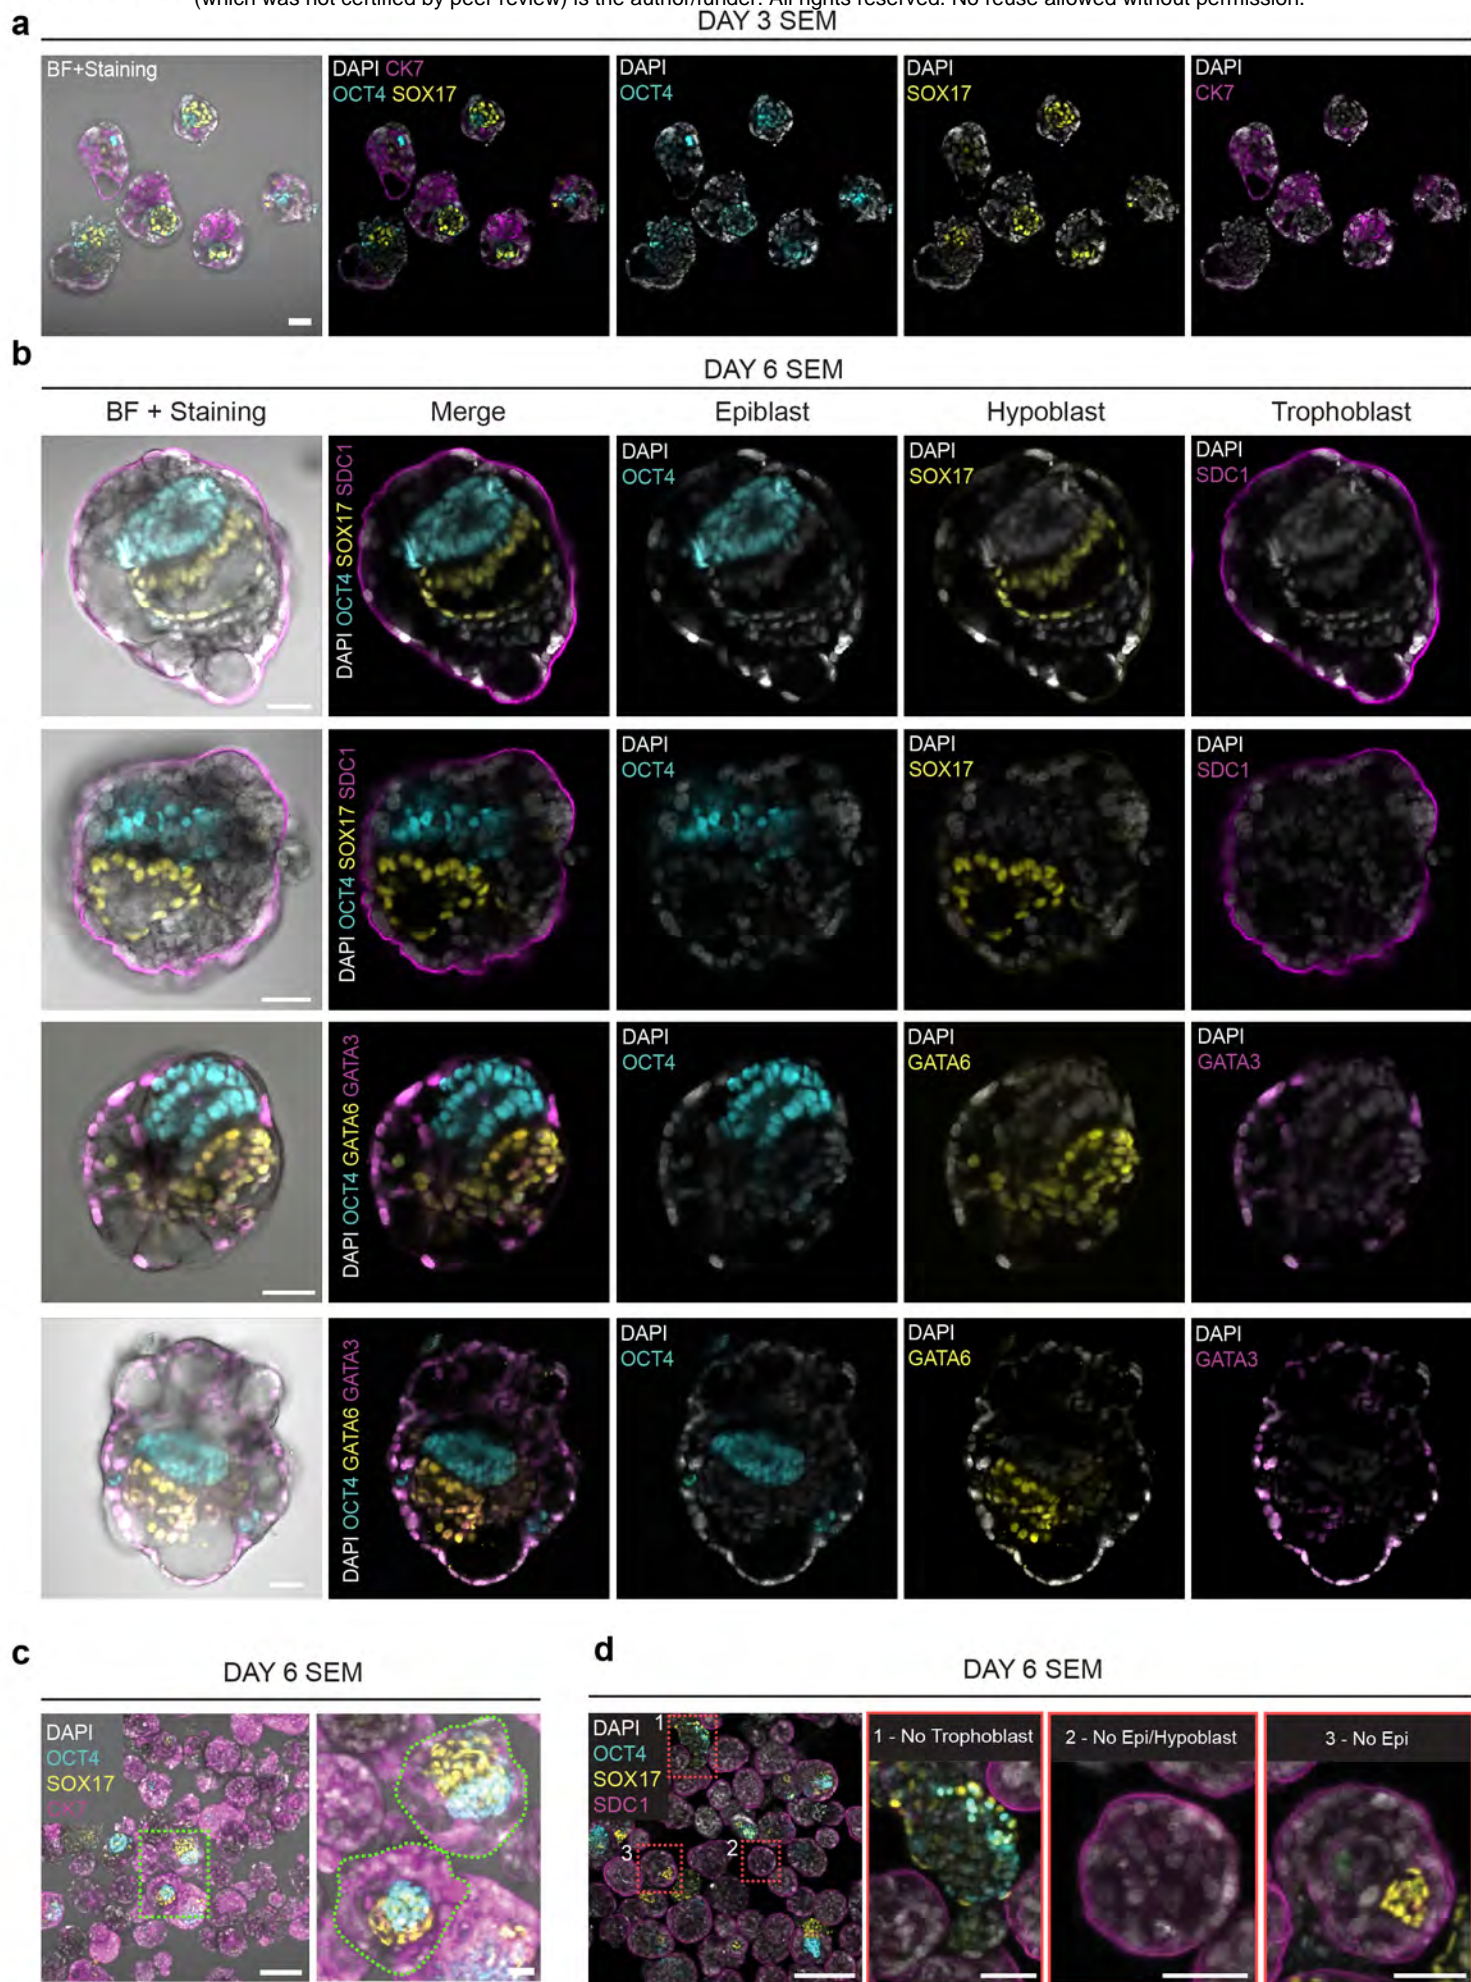



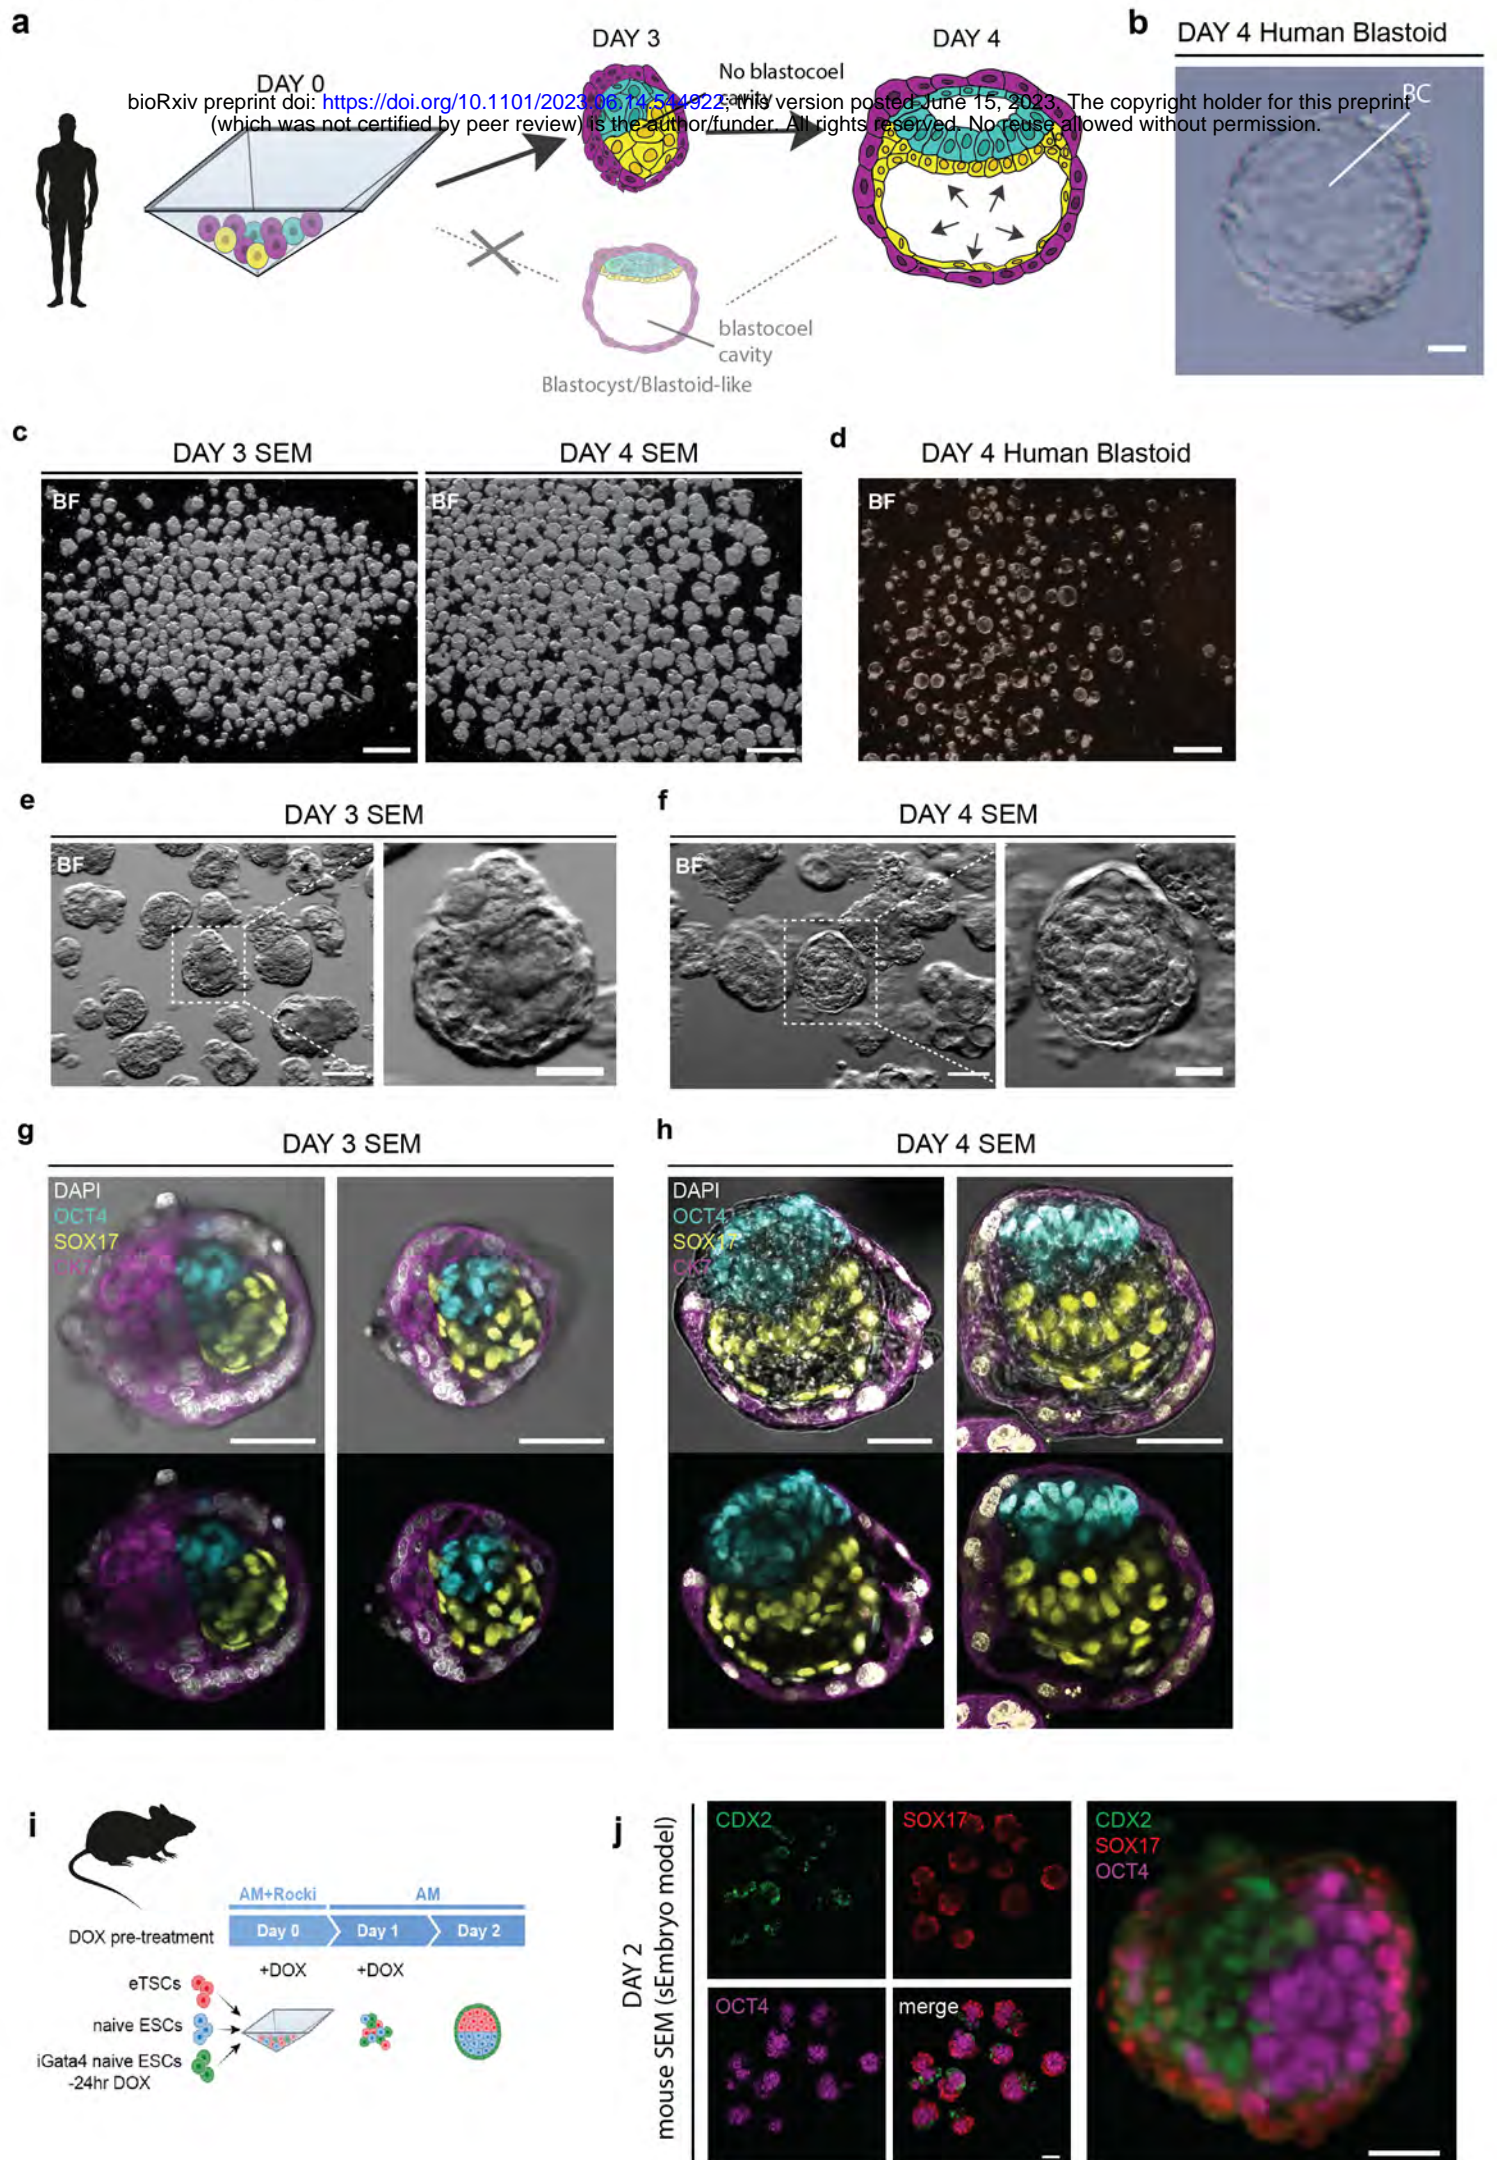



### SEM DAY 8

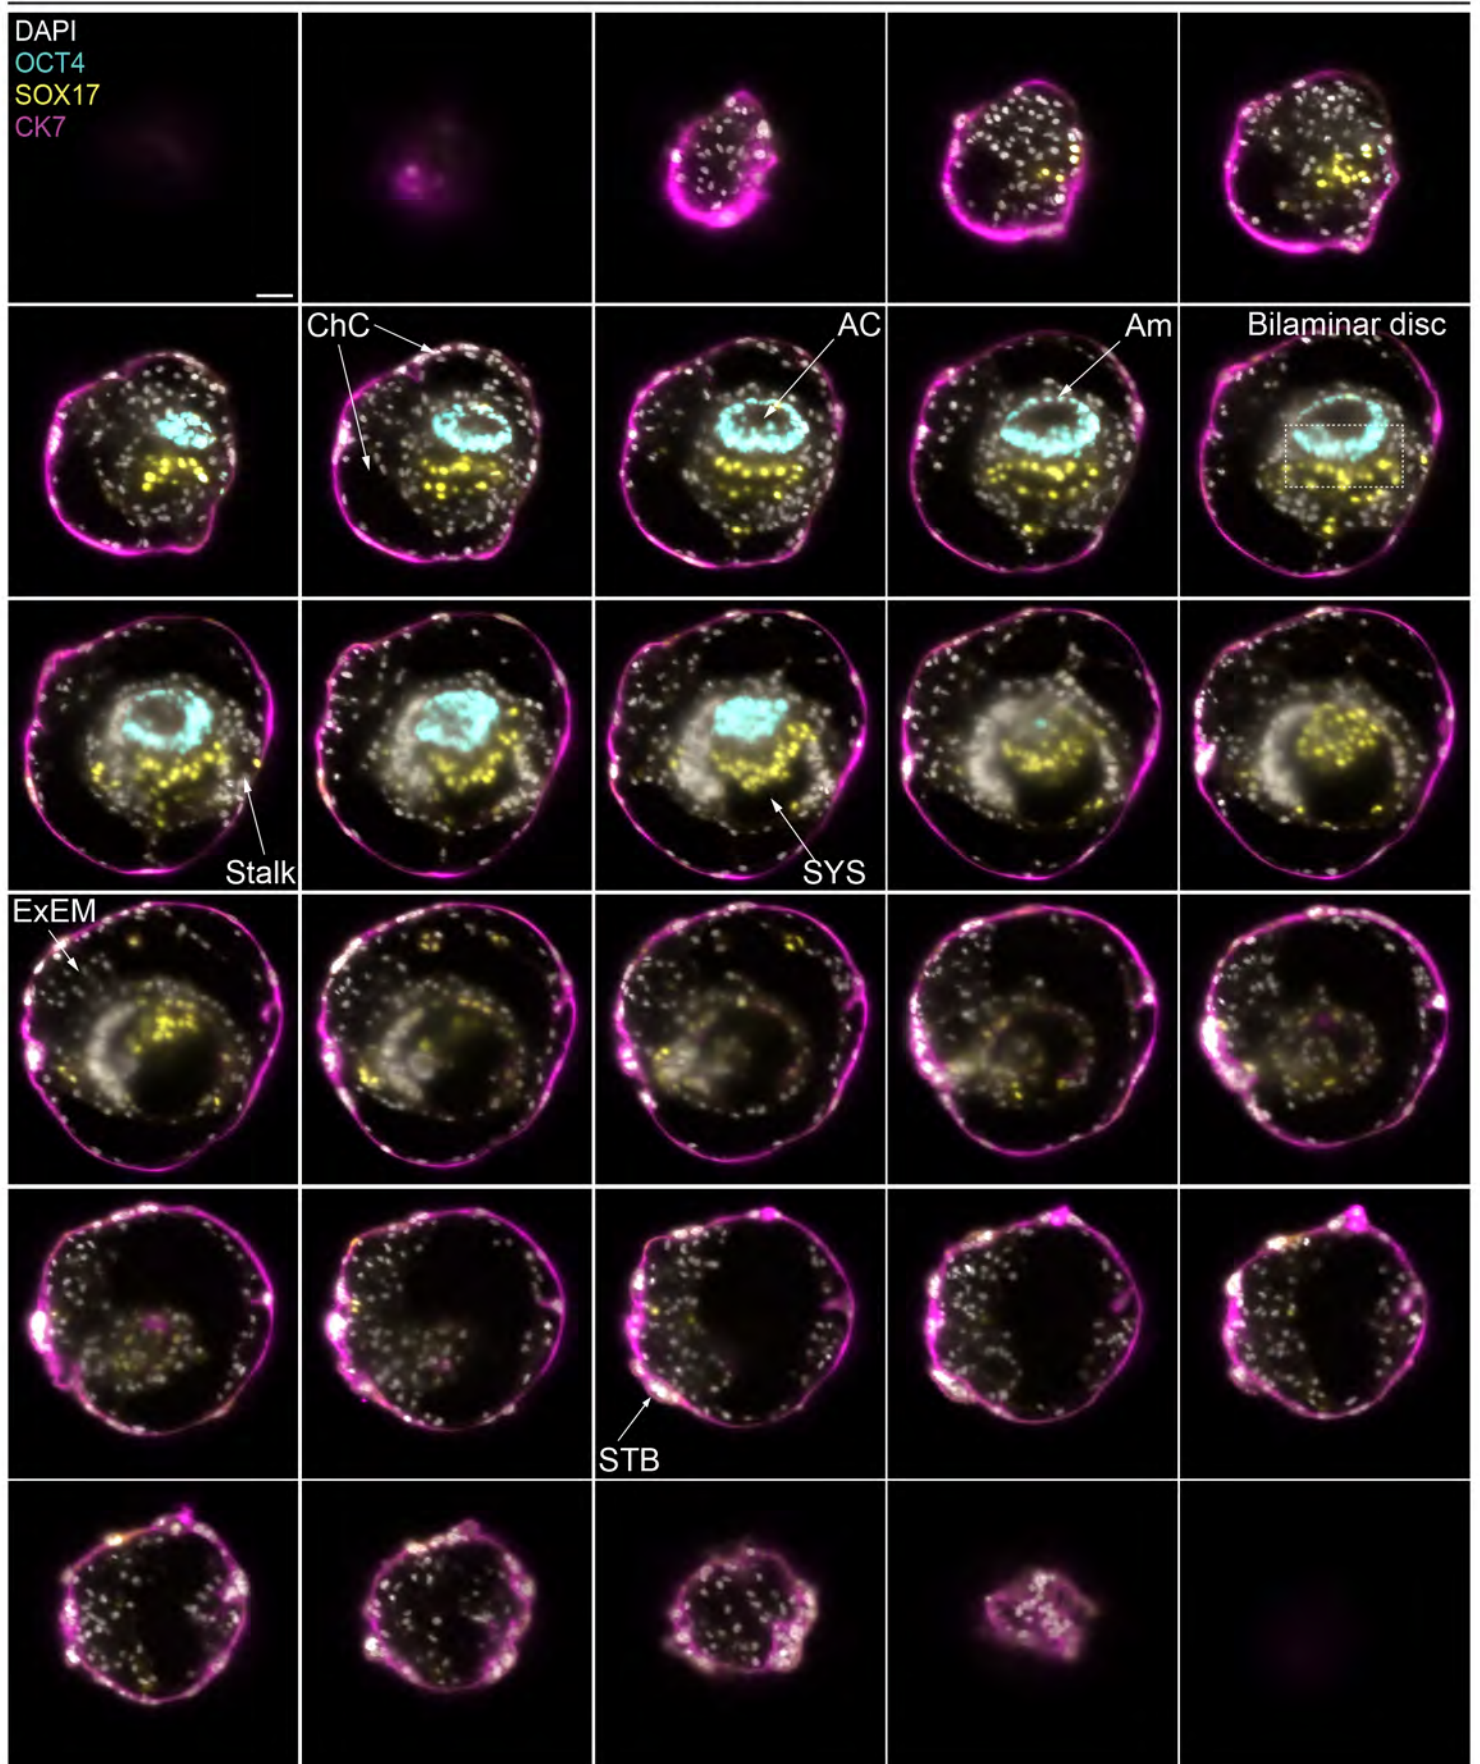



# Extended Data Figure 15

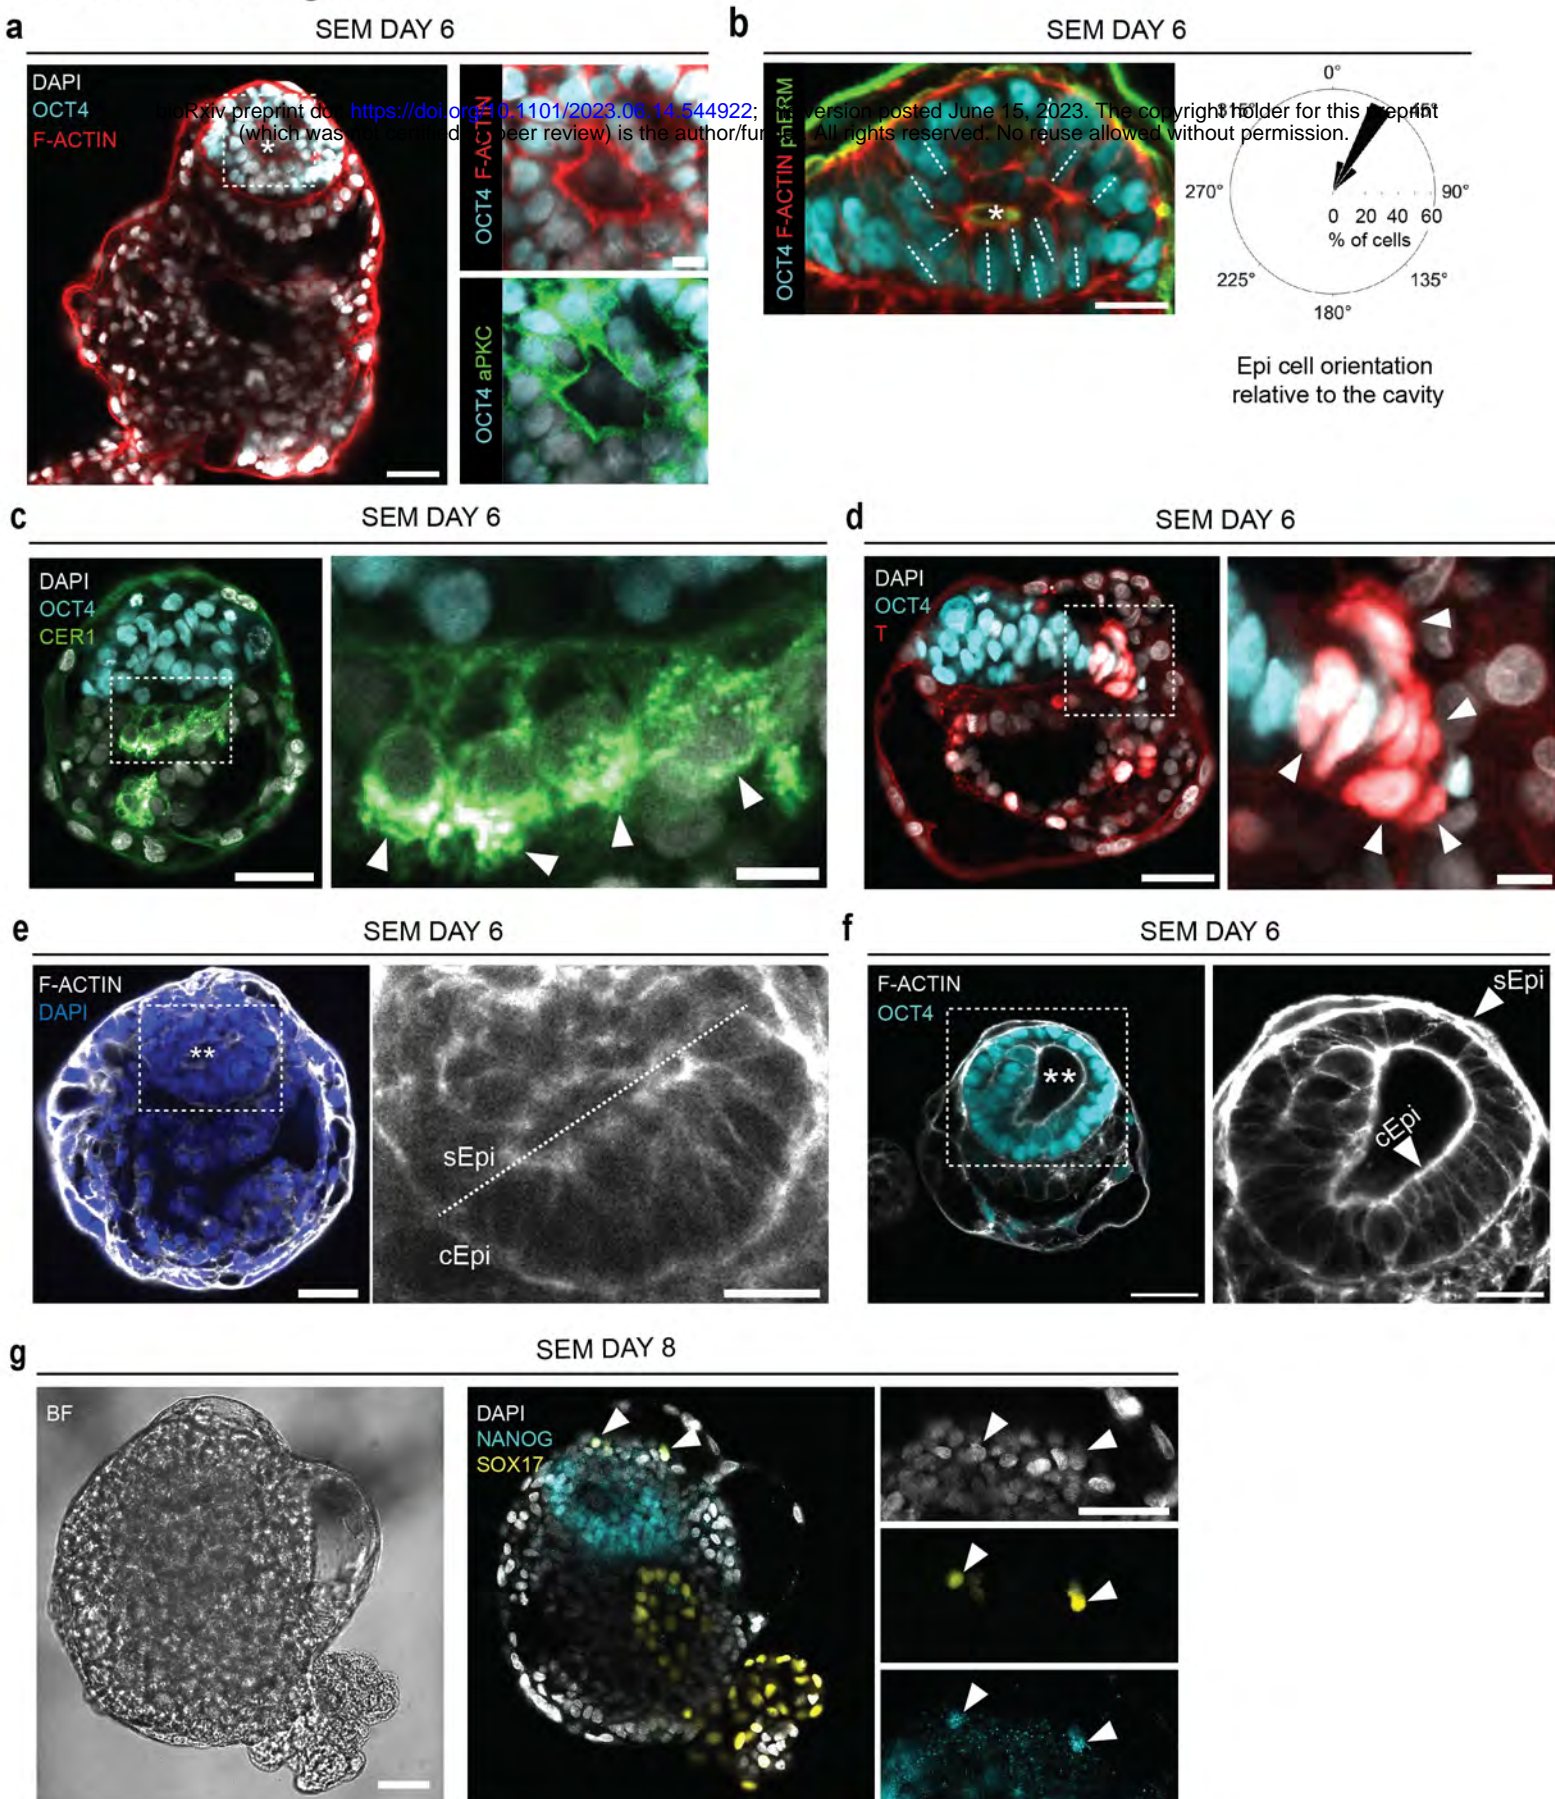



# Extended Data Figure 16

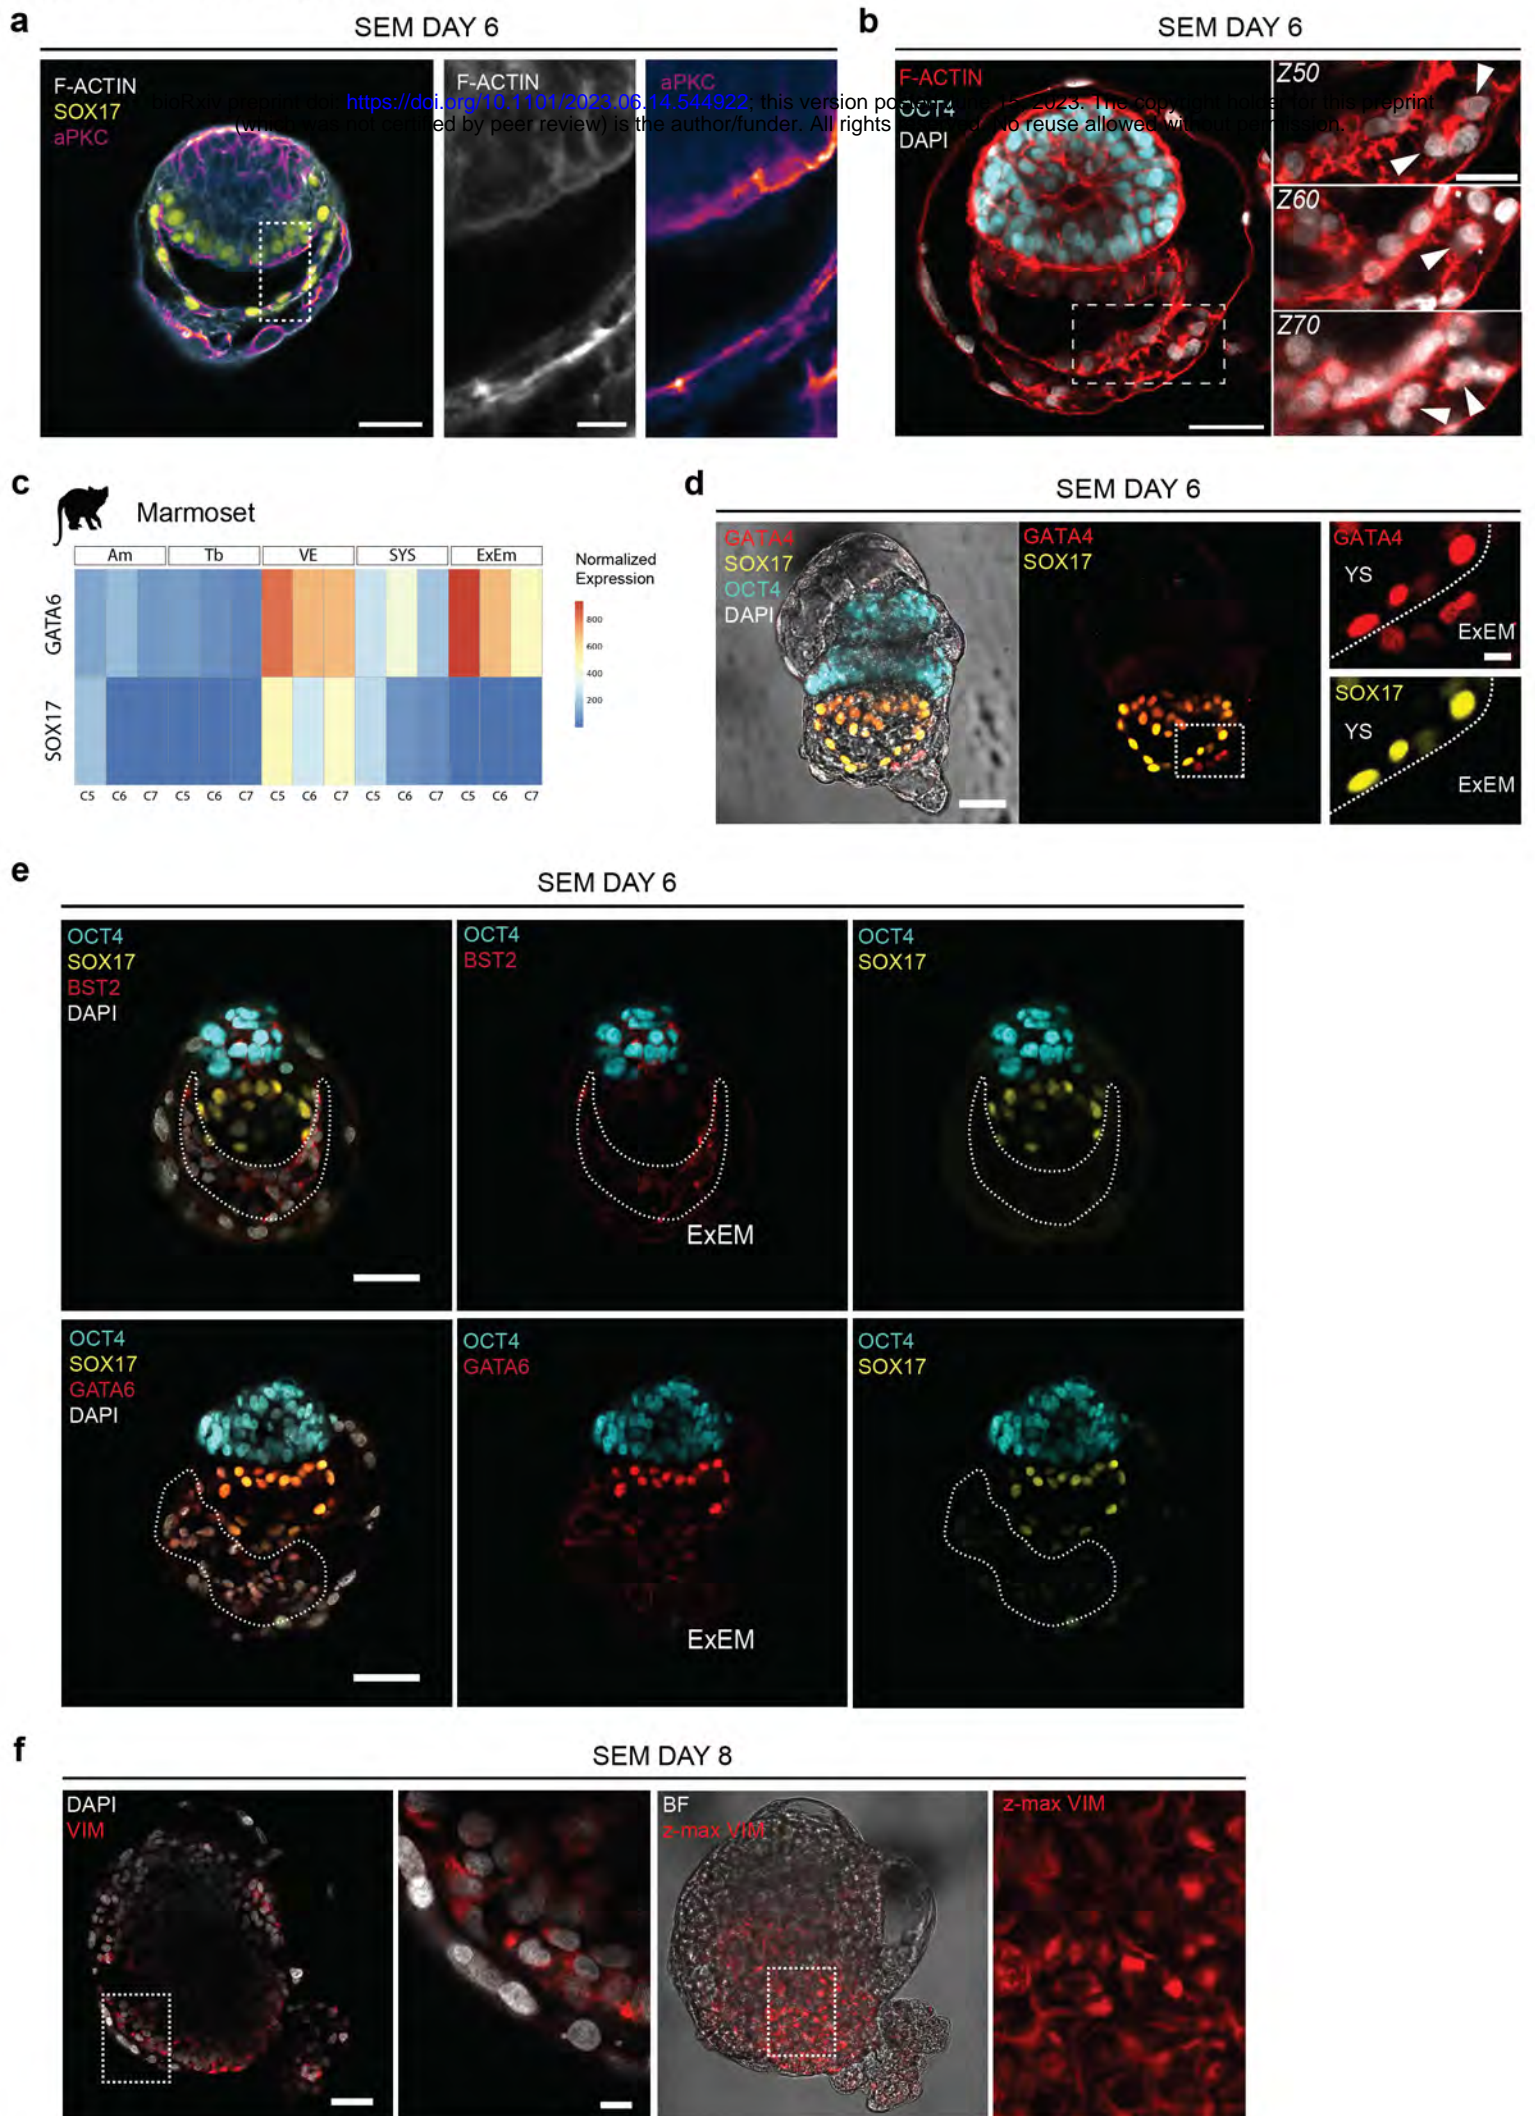



DAY 8 SEM

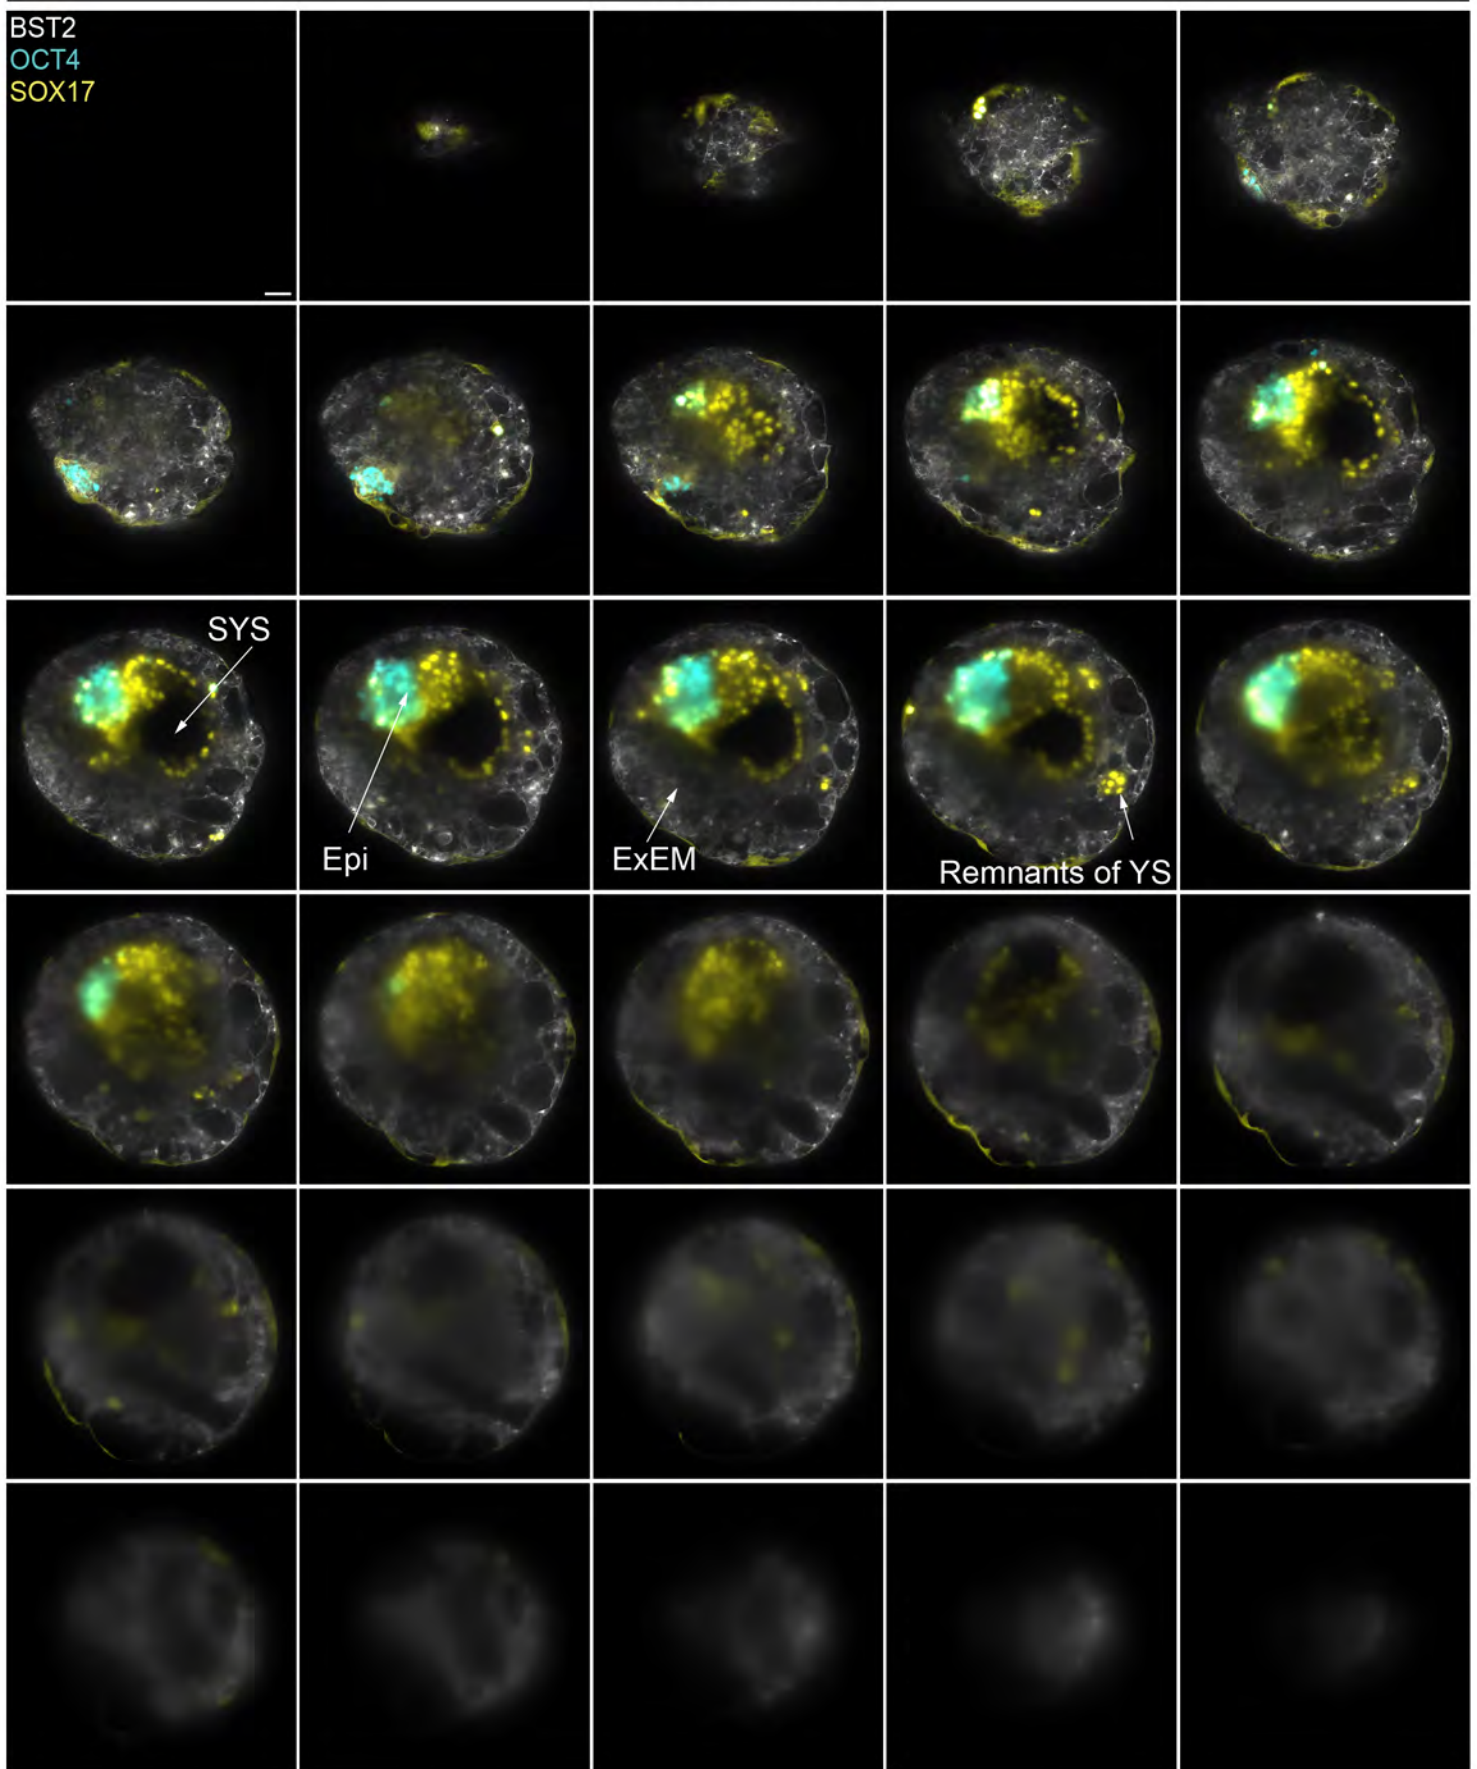

# Extended Data Figure 18

**a** SEM DAY 8

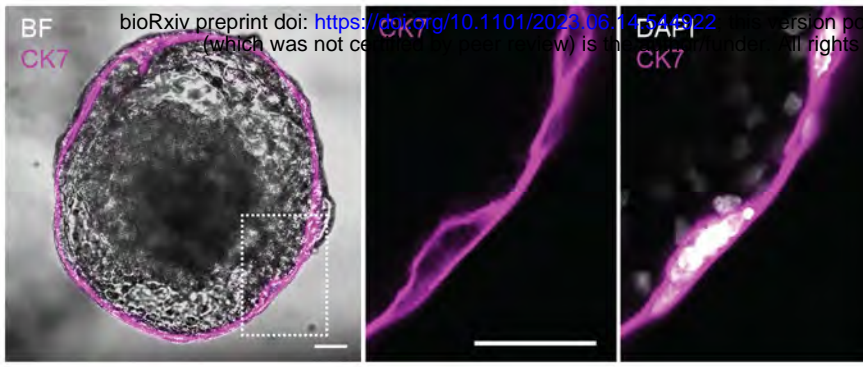

**g**

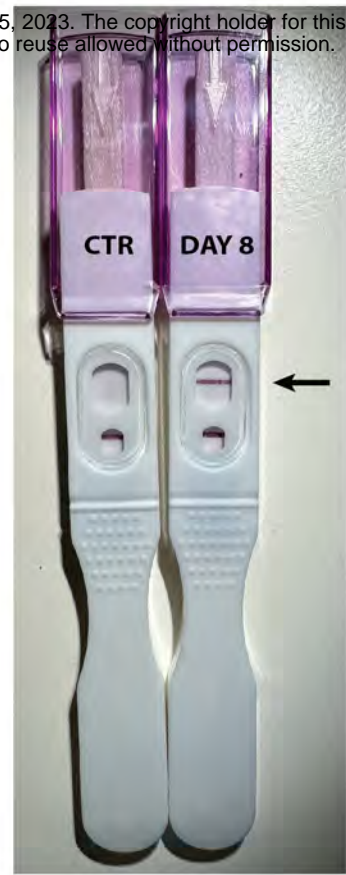

**b** SEM DAY 8

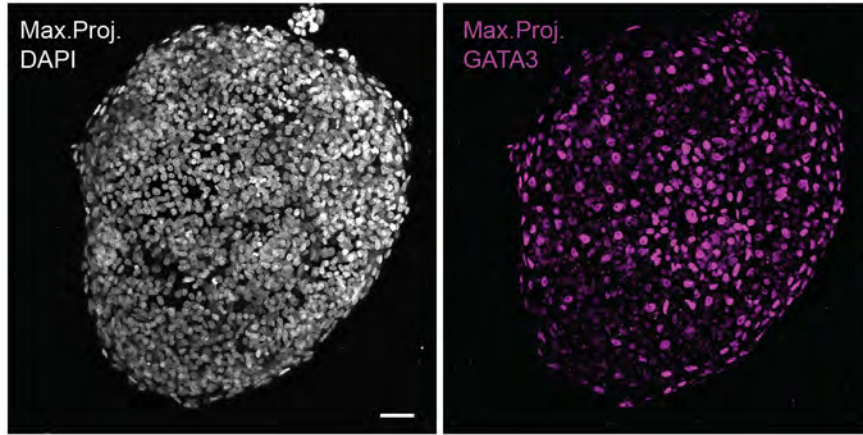

**c**

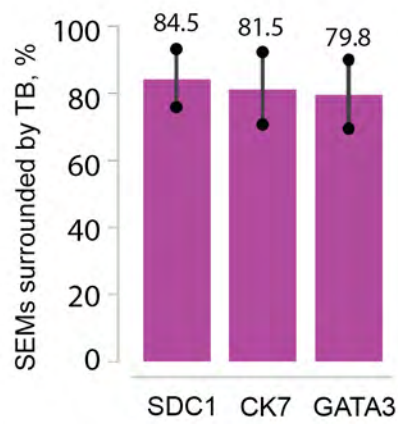

**d**

SEM DAY 6

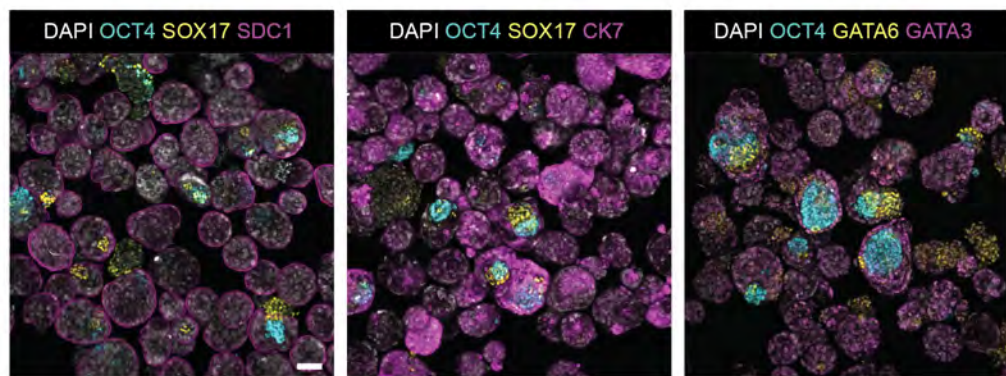

**e**

SEM DAY 6

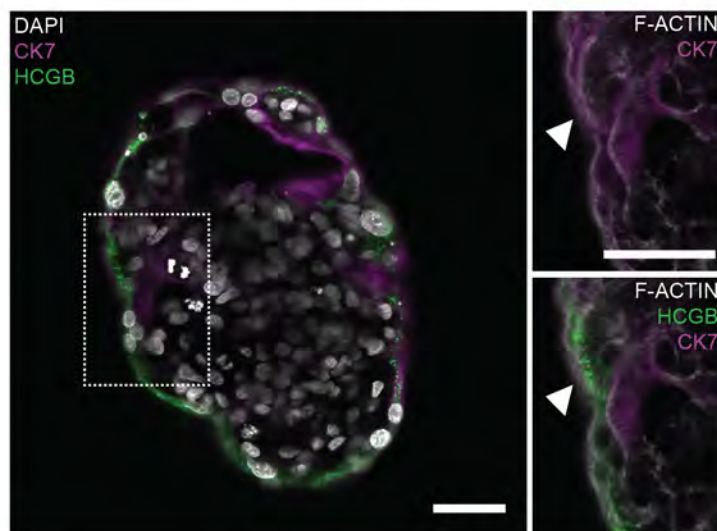

**f**

SEM DAY 6

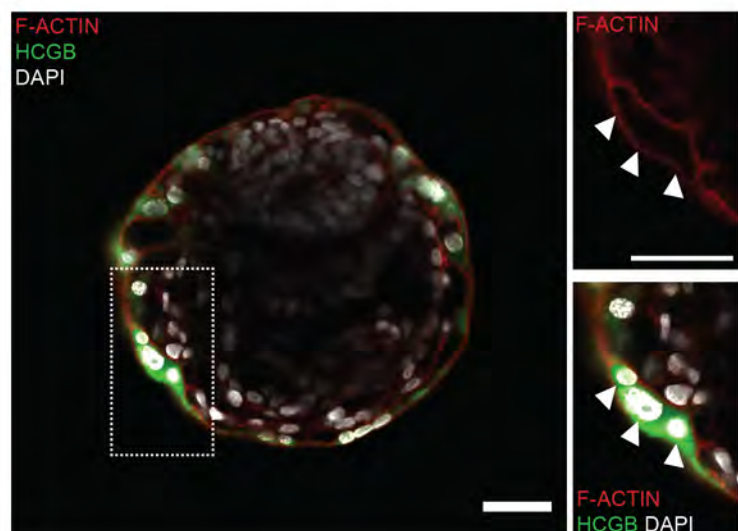



# Extended Data Figure 19

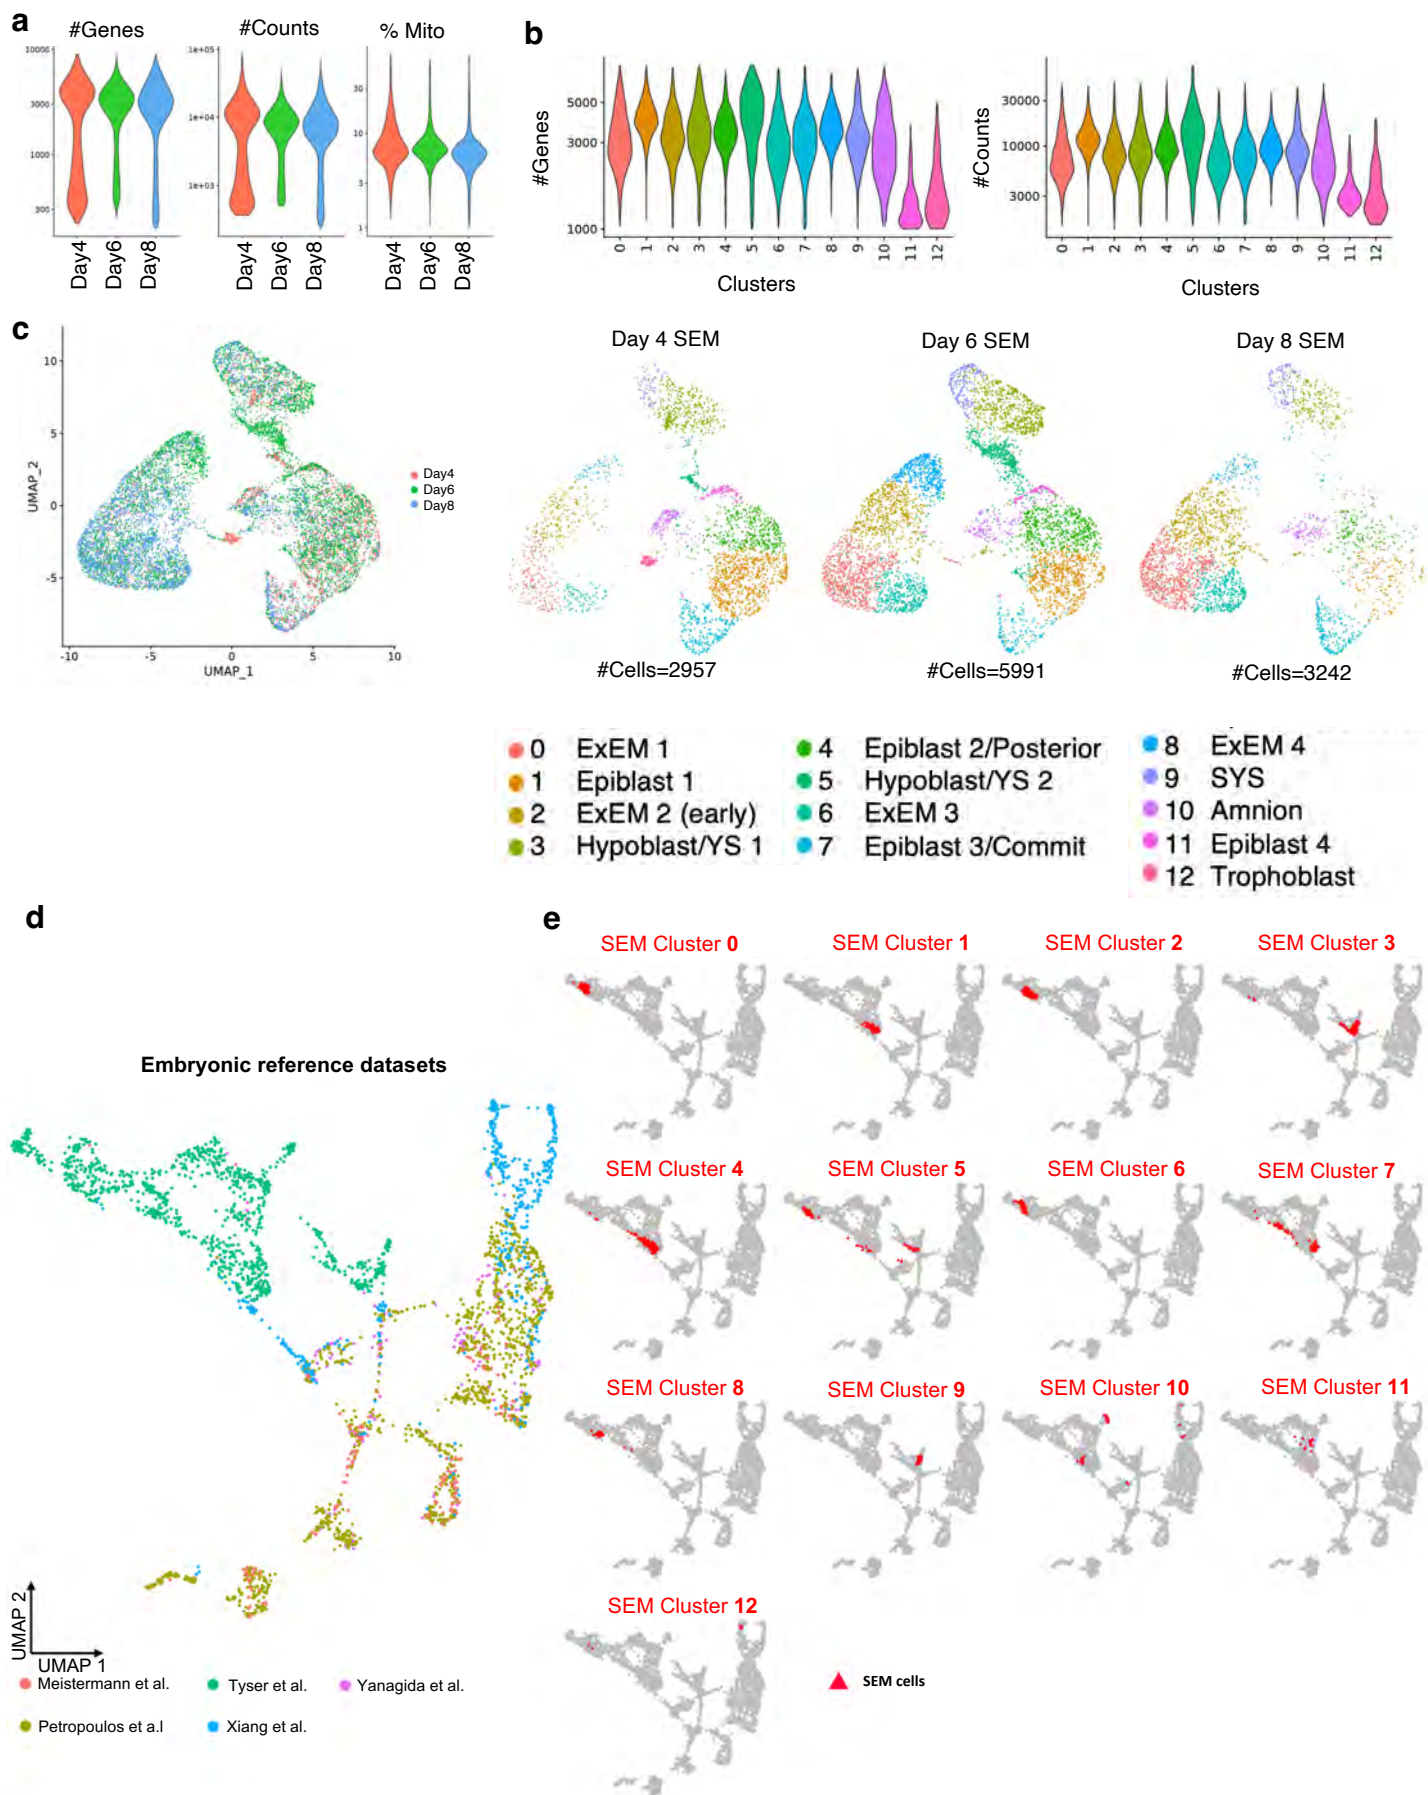

# Extended Data Figure 20

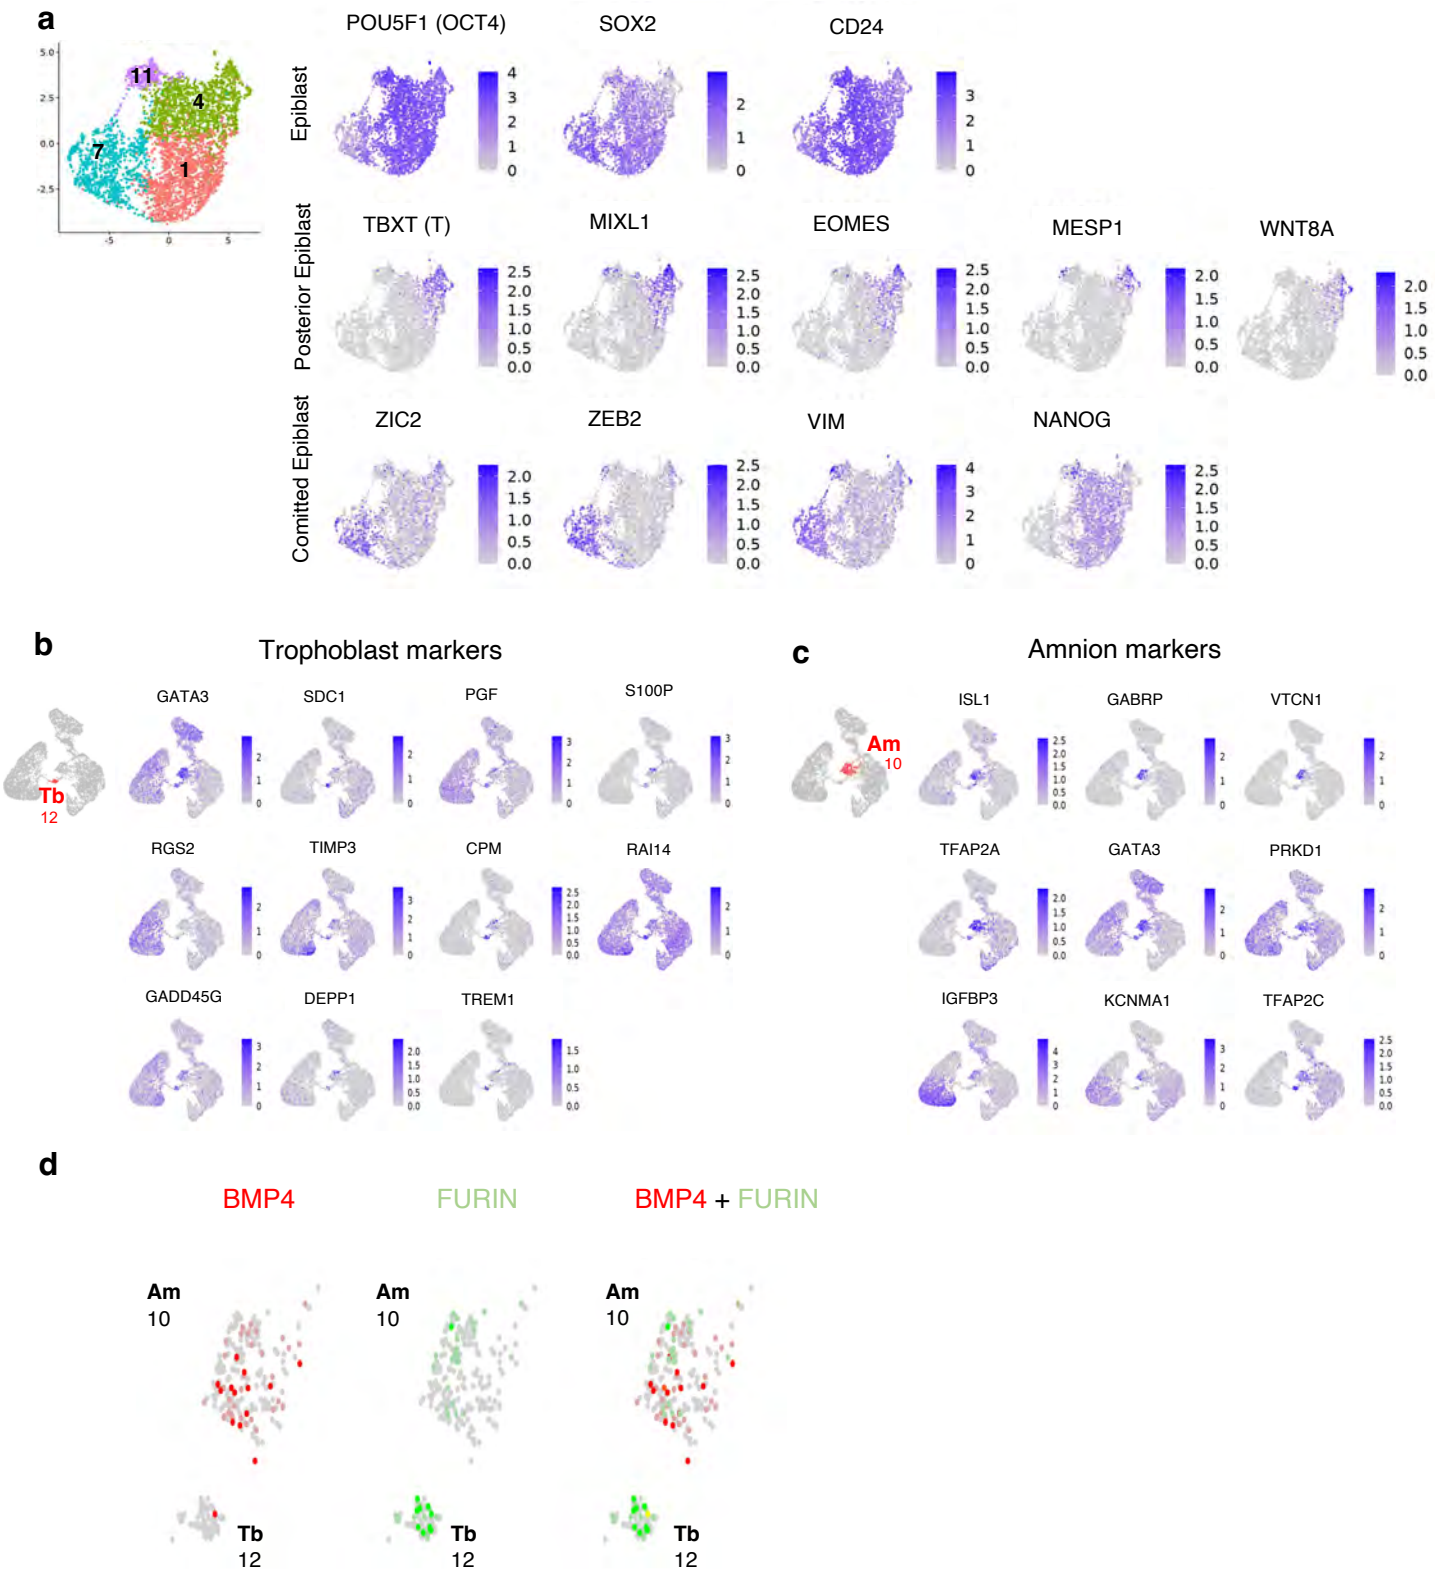

# Extended Data Figure 21

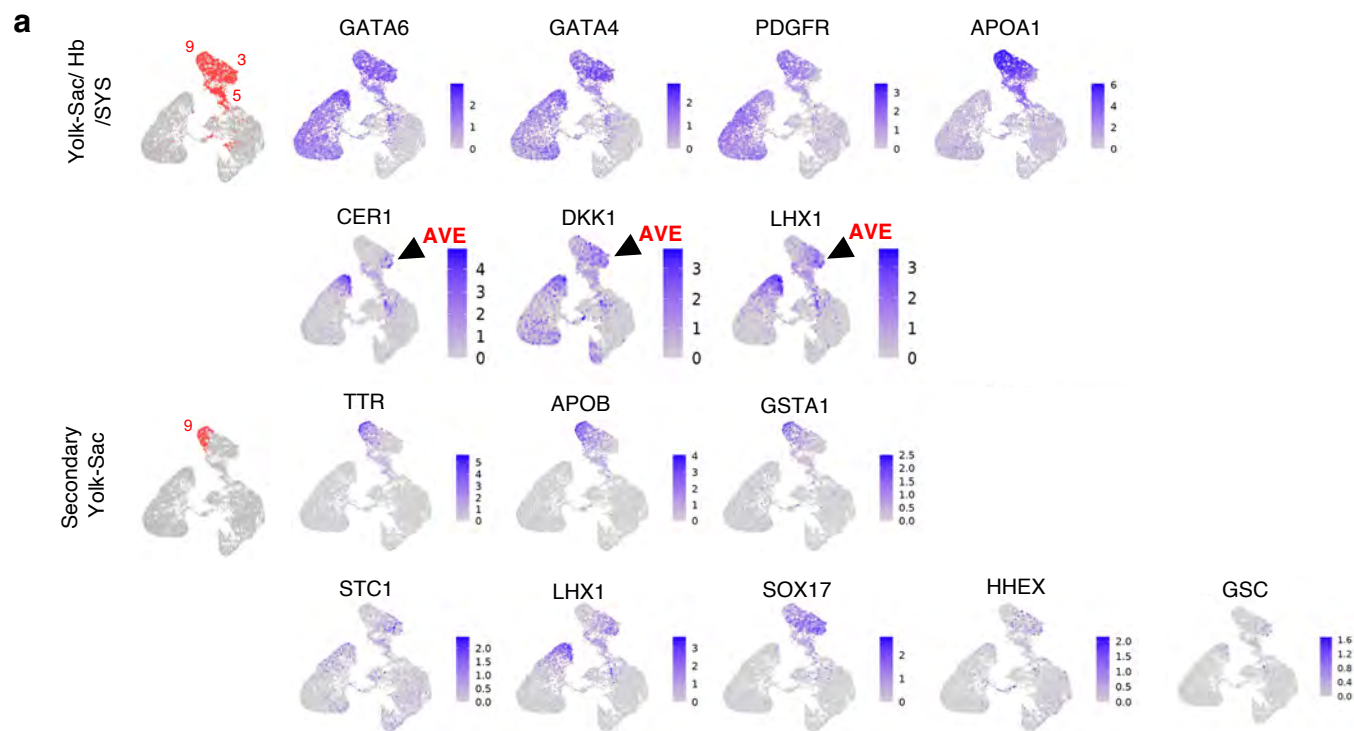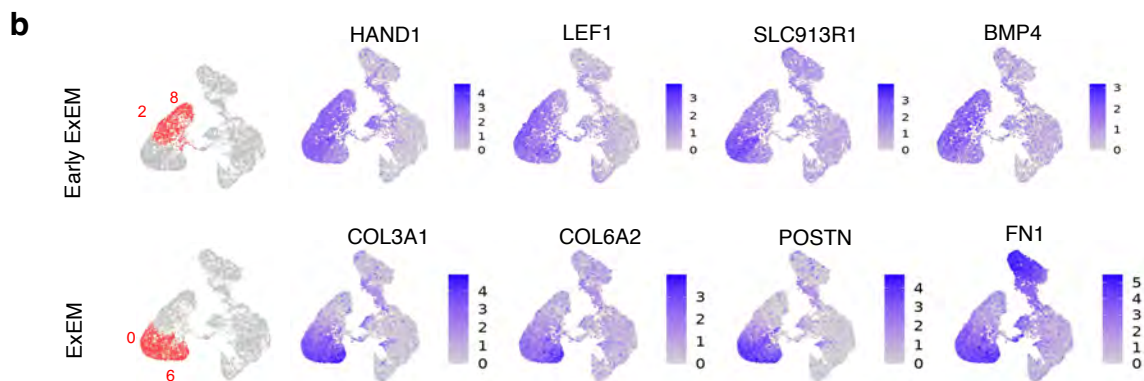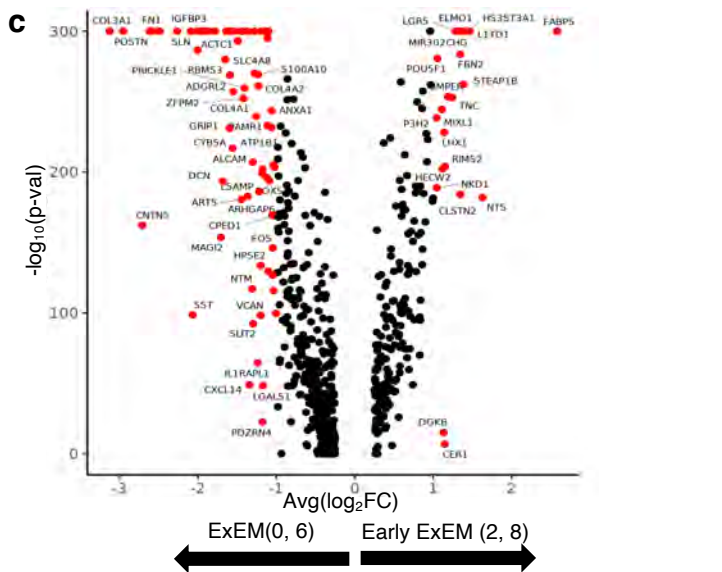

Source: https://www.biorxiv.org/content/10.1101/2023.06.14.544922v1.full.pdf
